# Supplementary material for: BRCA1/BRC-1 and SMC-5/6 regulate DNA repair pathway engagement during Caenorhabditis elegans meiosis
Source: eLife. 2024 Aug 8;13:e80687. doi: 10.7554/eLife.80687 (PMC11368404; doi:10.7554/eLife.80687)
Supplement: Figure 1—source data 1. — The total number of ICR assay progeny with GFP+ or non-GFP+ phenotypes are listed. Wild type data is shared with Figure 1—figure supplement 2, Figure 2, Figure 2—figure supplement 1, Figure 4, and Figure 4—figure supplement 1. [file elife-80687-fig1-data1.xlsx]

## Sheet: Sheet1
Experiment	Timepoint	Replicate	NR	myo-2::GFP+	myo-2+3::GFP+	myo-3::GFP+	Mitotic GFP+	NCO	CO	GFP+ Mutant	Total Progeny
Wild Type	10-22hr	1	873	5	5	1	13	10	1		897
Wild Type	10-22hr	2	525	0	0	2	77	0	2		604
Wild Type	10-22hr	3	1174	1	2	2	46	3	2		1225
Wild Type	10-22hr	5	1093	0	6	4	92	6	4		1195
Wild Type	10-22hr	SUM	3665	6	13	9	228	19	9		3921
Wild Type	22-34hr	1	518	1	1	1	6	2	1		527
Wild Type	22-34hr	2	927	0	4	2	54	4	2		987
Wild Type	22-34hr	3	749	0	7	0	17	7	0		773
Wild Type	22-34hr	5	1049	0	8	1	14	8	1		1072
Wild Type	22-34hr	SUM	3243	1	20	4	91	21	4		3359
Wild Type	34-46hr	1	493	0	4	1	6	4	1		504
Wild Type	34-46hr	2	602	0	2	3	25	2	3		632
Wild Type	34-46hr	3	248	0	0	0	2	0	0		250
Wild Type	34-46hr	4	1319	2	6	0	15	8	0		1342
Wild Type	34-46hr	5	918	0	4	0	14	4	0		936
Wild Type	34-46hr	SUM	3580	2	16	4	62	18	4		3664
Wild Type	46-58hr	1	224	0	1	0	1	1	0		226
Wild Type	46-58hr	2	213	0	2	0	9	2	0		224
Wild Type	46-58hr	3	106	0	0	0	1	0	0		107
Wild Type	46-58hr	4	1112	0	5	1	6	5	1		1124
Wild Type	46-58hr	5	685	0	6	0	11	6	0		702
Wild Type	46-58hr	SUM	2340	0	14	1	28	14	1		2383
brc-1(xoe4)	10-22hr	1	435	0	0	2	12	0	2		449
brc-1(xoe4)	10-22hr	2	549	0	2	5	19	2	5		575
brc-1(xoe4)	10-22hr	3	572	0	2	5	9	2	5		588
brc-1(xoe4)	10-22hr	4	408	0	4	4	14	4	4		430
brc-1(xoe4)	10-22hr	SUM	1964	0	8	16	54	8	16		2042
brc-1(xoe4)	22-34hr	1	450	1	1	6	1	2	6		459
brc-1(xoe4)	22-34hr	2	502	0	3	8	16	3	8		529
brc-1(xoe4)	22-34hr	3	569	0	1	12	5	2	12	1	588
brc-1(xoe4)	22-34hr	4	425	0	3	7	6	3	7		441
brc-1(xoe4)	22-34hr	SUM	1946	1	8	33	28	10	33	1	2017
brc-1(xoe4)	34-46hr	1	434	0	4	4	3	4	4		445
brc-1(xoe4)	34-46hr	2	542	0	4	8	6	4	8		560
brc-1(xoe4)	34-46hr	3	567	0	6	5	1	6	5		579
brc-1(xoe4)	34-46hr	4	413	0	2	3	3	2	3		421
brc-1(xoe4)	34-46hr	SUM	1956	0	16	20	13	16	20		2005
brc-1(xoe4)	46-58hr	1	127	0	1	3	1	1	3		132
brc-1(xoe4)	46-58hr	3	192	0	3	2	0	3	2		197
brc-1(xoe4)	46-58hr	4	137	0	0	0	1	0	0		138
brc-1(xoe4)	46-58hr	SUM	456	0	4	5	2	4	5		467
brc-1(tm1145);brd-1(dw1)	10-22hr	1	297	0	0	1	0	0	1		298
brc-1(tm1145);brd-1(dw1)	10-22hr	2	835	0	1	11	1	1	11		848
brc-1(tm1145);brd-1(dw1)	10-22hr	3	414	0	0	1	1	0	1		416
brc-1(tm1145);brd-1(dw1)	10-22hr	SUM	1546	0	1	13	2	1	13		1562
brc-1(tm1145);brd-1(dw1)	22-46hr	1	557	0	3	5	0	3	5		565
brc-1(tm1145);brd-1(dw1)	22-46hr	2	976	0	3	9	1	3	9		989
brc-1(tm1145);brd-1(dw1)	22-46hr	3	772	0	4	8	2	4	8		786
brc-1(tm1145);brd-1(dw1)	10-22hr	SUM	2305	0	10	22	3	10	22		2340
msh-2(ok2410)	10-22hr	1	196	0	1	0	0	1	0		197
msh-2(ok2410)	10-22hr	2	255	1	0	2	5	1	2		263
msh-2(ok2410)	10-22hr	SUM	451	1	1	2	5	2	2		460
msh-2(ok2410)	22-46hr	1	429	0	4	1	5	4	1		439
msh-2(ok2410)	22-46hr	2	272	0	0	0	0	0	0		272
msh-2(ok2410)	22-46hr	SUM	701	0	4	1	5	4	1		711
