# Supplementary material for: BRCA1/BRC-1 and SMC-5/6 regulate DNA repair pathway engagement during Caenorhabditis elegans meiosis
Source: eLife. 2024 Aug 8;13:e80687. doi: 10.7554/eLife.80687 (PMC11368404; doi:10.7554/eLife.80687)
Supplement: Figure 1—source data 2. — The number of scorable chromatid pairs with SCE or no SCE events (no_SCE) are listed for each image assessed in generating this dataset. Wild type data is shared with Figure 2. [file elife-80687-fig1-data2.xlsx]

## Sheet: Sheet1
Genotype	Image_Number	SCE	No_SCE	Source
brc-1(xoe4)	3	0	2	This manuscript
brc-1(xoe4)	9	0	2	This manuscript
brc-1(xoe4)	11	0	2	This manuscript
brc-1(xoe4)	14	0	2	This manuscript
brc-1(xoe4)	21	1	1	This manuscript
brc-1(xoe4)	23	1	3	This manuscript
brc-1(xoe4)	24	1	1	This manuscript
brc-1(xoe4)	25	0	0	This manuscript
brc-1(xoe4)	27	0	0	This manuscript
brc-1(xoe4)	28	0	0	This manuscript
brc-1(xoe4)	29	1	0	This manuscript
brc-1(xoe4)	30	0	2	This manuscript
brc-1(xoe4)	31	1	2	This manuscript
brc-1(xoe4)	35	0	2	This manuscript
brc-1(xoe4)	36	0	2	This manuscript
brc-1(xoe4)	37	0	0	This manuscript
N2		2	47	Almanzar et al. Curr. Biol. 2021
