# Supplementary material for: BRCA1/BRC-1 and SMC-5/6 regulate DNA repair pathway engagement during Caenorhabditis elegans meiosis
Source: eLife. 2024 Aug 8;13:e80687. doi: 10.7554/eLife.80687 (PMC11368404; doi:10.7554/eLife.80687)
Supplement: Figure 1—source data 3. — The total number of IH assay progeny with recombinant or mutant nonUnc phenotypes or Unc nonrecombinant phenotypes are listed. Wild type data is shared with Figure 1—figure supplement 3, Figure 2, and Figure 2—figure supplement 2. [file elife-80687-fig1-data3.xlsx]

## Sheet: Sheet1
Replicate	Geno	Timept	nDpyUnc	DpyUnc	Unc	CO	MUTANT	NCO	Undetermined non-Unc	Total non-Unc Recombinant	Total Progeny	Total non-Unc Progeny
1	brc-1(xoe4)	10-22hr	364	147	511	0	0	0	0	0	511	0
2	brc-1(xoe4)	10-22hr	167	80	247	0	0	0	0	0	247	0
SUM	brc-1(xoe4)	10-22hr	531	227	758	0	0	0	0	0	758	0
1	brc-1(xoe4)	22-34hr	355	141	496	3	2	13	2	16	516	20
2	brc-1(xoe4)	22-34hr	193	96	289	3	3	11	1	14	307	18
SUM	brc-1(xoe4)	22-34hr	548	237	785	6	5	24	3	30	823	38
1	brc-1(xoe4)	34-46hr	163	63	226	2	0	16	0	18	244	18
2	brc-1(xoe4)	34-46hr	134	66	200	2	0	22	0	24	224	24
SUM	brc-1(xoe4)	34-46hr	297	129	426	4	0	38	0	42	468	42
1	brc-1(xoe4)	46-58hr	33	13	46	0	0	2	0	2	48	2
2	brc-1(xoe4)	46-58hr	24	21	45	0	0	3	1	3	49	4
SUM	brc-1(xoe4)	46-58hr	57	34	91	0	0	5	1	5	97	6
1	WT	10-22hr	518	199	717	0	0	1	0	1	718	1
2	WT	10-22hr	421	167	588	0	0	2	0	2	590	2
SUM	WT	10-22hr	939	366	1305	0	0	3	0	3	1308	3
1	WT	22-34hr	570	219	789	1	0	12	0	13	802	13
2	WT	22-34hr	613	260	873	2	0	18	0	20	893	20
SUM	WT	22-34hr	1183	479	1662	3	0	30	0	33	1695	33
1	WT	34-46hr	594	176	770	7	0	45	1	52	823	53
2	WT	34-46hr	501	205	706	3	0	60	0	63	769	63
SUM	WT	34-46hr	1095	381	1476	10	0	105	1	115	1592	116
1	WT	46-58hr	194	62	256	2	0	19	1	21	278	22
2	WT	46-58hr	191	70	261	4	0	19	0	23	284	23
SUM	WT	46-58hr	385	132	517	6	0	38	1	44	562	45
