# Supplementary material for: BRCA1/BRC-1 and SMC-5/6 regulate DNA repair pathway engagement during Caenorhabditis elegans meiosis
Source: eLife. 2024 Aug 8;13:e80687. doi: 10.7554/eLife.80687 (PMC11368404; doi:10.7554/eLife.80687)
Supplement: Figure 2—source data 1. — The total number of ICR assay progeny with GFP+ or non-GFP+ phenotypes are listed. Wild type data is shared with Figure 1, Figure 1—figure supplement 2, Figure 2, Figure 2—figure supplement 1, Figure 4, and Figure 4—figure supplement 1. [file elife-80687-fig2-data1.xlsx]

## Sheet: Sheet1
Experiment	Timepoint	Replicate	NR	myo-2::GFP+	myo-2+3::GFP+	myo-3::GFP+	Mitotic GFP+	NCO	CO	GFP+ Mutant	Brood Size
Wild Type	10-22hr	1	873	5	5	1	13	10	1		897
Wild Type	10-22hr	2	525	0	0	2	77	0	2		604
Wild Type	10-22hr	3	1174	1	2	2	46	3	2		1225
Wild Type	10-22hr	5	1093	0	6	4	92	6	4		1195
Wild Type	10-22hr	SUM	3665	6	13	9	228	19	9		3921
Wild Type	22-34hr	1	518	1	1	1	6	2	1		527
Wild Type	22-34hr	2	927	0	4	2	54	4	2		987
Wild Type	22-34hr	3	749	0	7	0	17	7	0		773
Wild Type	22-34hr	5	1049	0	8	1	14	8	1		1072
Wild Type	22-34hr	SUM	3243	1	20	4	91	21	4		3359
Wild Type	34-46hr	1	493	0	4	1	6	4	1		504
Wild Type	34-46hr	2	602	0	2	3	25	2	3		632
Wild Type	34-46hr	3	248	0	0	0	2	0	0		250
Wild Type	34-46hr	4	1319	2	6	0	15	8	0		1342
Wild Type	34-46hr	5	918	0	4	0	14	4	0		936
Wild Type	34-46hr	SUM	3580	2	16	4	62	18	4		3664
Wild Type	46-58hr	1	224	0	1	0	1	1	0		226
Wild Type	46-58hr	2	213	0	2	0	9	2	0		224
Wild Type	46-58hr	3	106	0	0	0	1	0	0		107
Wild Type	46-58hr	4	1112	0	5	1	6	5	1		1124
Wild Type	46-58hr	5	685	0	6	0	11	6	0		702
Wild Type	46-58hr	SUM	2340	0	14	1	28	14	1		2383
smc-5(ok2421)	10-22hr	1	199	0	1	1	34	1	1		235
smc-5(ok2421)	10-22hr	2	406	0	4	4	53	4	4		467
smc-5(ok2421)	10-22hr	3	278	0	4	1	23	4	1		306
smc-5(ok2421)	10-22hr	4	306	0	1	2	33	1	2		342
smc-5(ok2421)	10-22hr	SUM	1189	0	10	8	143	10	8		1350
smc-5(ok2421)	22-34hr	1	308	0	3	3	49	3	3		363
smc-5(ok2421)	22-34hr	2	563	0	11	4	15	11	4		593
smc-5(ok2421)	22-34hr	3	278	0	4	2	9	4	2		293
smc-5(ok2421)	22-34hr	4	482	0	5	5	30	5	5		522
smc-5(ok2421)	22-34hr	SUM	1631	0	23	14	103	23	14		1771
smc-5(ok2421)	34-46hr	1	163	0	1	0	8	1	0		172
smc-5(ok2421)	34-46hr	2	470	0	7	2	15	7	2		494
smc-5(ok2421)	34-46hr	3	259	0	3	1	6	3	1		269
smc-5(ok2421)	34-46hr	4	484	0	6	1	24	6	1		515
smc-5(ok2421)	34-46hr	SUM	1376	0	17	4	53	17	4		1450
smc-5(ok2421)	46-58hr	1	39	0	1	0	2	1	0		42
smc-5(ok2421)	46-58hr	2	125	0	0	0	1	0	0		126
smc-5(ok2421)	46-58hr	3	65	0	3	0	1	3	0		69
smc-5(ok2421)	46-58hr	4	206	0	2	2	2	2	2		212
smc-5(ok2421)	46-58hr	SUM	435	0	6	2	6	6	2		449
smc-6(ok3294)	10-22hr	1	522	0	0	0	0	0	0		522
smc-6(ok3294)	10-22hr	2	399	0	3	0	1	3	0		403
smc-6(ok3294)	10-22hr	3	920	0	6	1	3	6	1		930
smc-6(ok3294)	10-22hr	SUM	1841	0	9	1	4	9	1		1855
smc-6(ok3294)	22-46hr	1	433	0	2	1	4	2	1		440
smc-6(ok3294)	22-46hr	2	918	0	16	1	3	16	1		938
smc-6(ok3294)	22-46hr	3	740	2	5	0	4	7	0		751
smc-6(ok3294)	10-22hr	SUM	2091	2	23	2	11	25	2		2129
