# Supplementary material for: BRCA1/BRC-1 and SMC-5/6 regulate DNA repair pathway engagement during Caenorhabditis elegans meiosis
Source: eLife. 2024 Aug 8;13:e80687. doi: 10.7554/eLife.80687 (PMC11368404; doi:10.7554/eLife.80687)
Supplement: Figure 2—source data 2. — The number of scorable chromatid pairs with SCE or no SCE events are listed for each image assessed in generating this dataset. Wild type data is shared with Figure 1C. [file elife-80687-fig2-data2.xlsx]

## Sheet: Sheet1
Genotype	SCE	No_SCE	Source
smc-5(ok2421)	3	2	This manuscript
smc-5(ok2421)	0	1	This manuscript
smc-5(ok2421)	2	4	This manuscript
smc-5(ok2421)	0	2	This manuscript (univalents)
N2	2	47	Almanzar et al. Curr. Biol. 2021
