# Supplementary material for: BRCA1/BRC-1 and SMC-5/6 regulate DNA repair pathway engagement during Caenorhabditis elegans meiosis
Source: eLife. 2024 Aug 8;13:e80687. doi: 10.7554/eLife.80687 (PMC11368404; doi:10.7554/eLife.80687)
Supplement: Figure 2—source data 3. — The total number of IH assay nonrecombinant, recombinant, mutant, or undetermined non-Unc progeny are listed. Wild type data is shared with Figure 1, Figure 1—figure supplement 3, and Figure 2—figure supplement 2. [file elife-80687-fig2-data3.xlsx]

## Sheet: Sheet1
Replicate	Genotype	Timept	nDpyUnc	DpyUnc	Unc	CO	MUTANT	NCO	Undetermined non-Unc	Total non-Unc Recombinant	Total Progeny	Total non-Unc Progeny
1	smc-5(ok2421)	10-22hr	99	37	136	0	0	0	0	0	136	0
2	smc-5(ok2421)	10-22hr	258	144	402	0	0	1	0	1	403	1
3	smc-5(ok2421)	10-22hr	345	145	490	0	0	2	0	2	492	2
SUM	smc-5(ok2421)	10-22hr	702	326	1028	0	0	3	0	3	1031	3
1	smc-5(ok2421)	22-34hr	180	49	229	2	0	7	0	9	238	9
2	smc-5(ok2421)	22-34hr	362	118	480	0	0	20	0	20	500	20
3	smc-5(ok2421)	22-34hr	489	192	681	2	1	42	2	44	728	47
SUM	smc-5(ok2421)	22-34hr	1031	359	1390	4	1	69	2	73	1466	76
1	smc-5(ok2421)	34-46hr	116	38	154	0	0	19	0	19	173	19
2	smc-5(ok2421)	34-46hr	351	109	460	2	0	41	3	43	506	46
3	smc-5(ok2421)	34-46hr	477	155	632	8	0	45	5	53	690	58
SUM	smc-5(ok2421)	34-46hr	944	302	1246	10	0	105	8	115	1369	123
1	smc-5(ok2421)	46-58hr	46	13	59	0	0	2	2	2	63	4
2	smc-5(ok2421)	46-58hr	162	63	225	1	0	13	2	14	241	16
3	smc-5(ok2421)	46-58hr	195	72	267	3	0	20	2	23	292	25
SUM	smc-5(ok2421)	46-58hr	403	148	551	4	0	35	6	39	596	45
1	WT	10-22hr	518	199	717	0	0	1	0	1	718	1
2	WT	10-22hr	421	167	588	0	0	2	0	2	590	2
SUM	WT	10-22hr	939	366	1305	0	0	3	0	3	1308	3
1	WT	22-34hr	570	219	789	1	0	12	0	13	802	13
2	WT	22-34hr	613	260	873	2	0	18	0	20	893	20
SUM	WT	22-34hr	1183	479	1662	3	0	30	0	33	1695	33
1	WT	34-46hr	594	176	770	7	0	45	1	52	823	53
2	WT	34-46hr	501	205	706	3	0	60	0	63	769	63
SUM	WT	34-46hr	1095	381	1476	10	0	105	1	115	1592	116
1	WT	46-58hr	194	62	256	2	0	19	1	21	278	22
2	WT	46-58hr	191	70	261	4	0	19	0	23	284	23
SUM	WT	46-58hr	385	132	517	6	0	38	1	44	562	45
