# Supplementary material for: BRCA1/BRC-1 and SMC-5/6 regulate DNA repair pathway engagement during Caenorhabditis elegans meiosis
Source: eLife. 2024 Aug 8;13:e80687. doi: 10.7554/eLife.80687 (PMC11368404; doi:10.7554/eLife.80687)
Supplement: Figure 3—source data 1. — The polymorphism conversions scored in individual sequenced ICR assay conversion tracts are listed. [file elife-80687-fig3-data1.xlsx]

## Sheet: Sheet1
					Polymorphisms (in bp 3' from Mos1 excision, 1 = converted, 0.5 = heteroduplex, 0 = unconverted)
DNA ID#	Genotype	GFP Phenotype	Recombination Outcome	Timepoint	12	107	209	543	546	547	548	561	562	565	566	567	Source
58	Wild Type	pmyo2/3	NCO	22-34 hrs.	1	0	0	0	0	0	0	0	0	0	0	0	Toraason et al. Curr Biol 2021
59	Wild Type	pmyo2/3	NCO	10-22 hrs.	1	0	0	0	0	0	0	0	0	0	0	0	Toraason et al. Curr Biol 2021
60	Wild Type	pmyo2	NCO	10-22 hrs.	1	1	1	0	0	0	0	0	0	0	0	0	Toraason et al. Curr Biol 2021
61	Wild Type	pmyo2/3	NCO	10-22 hrs.	1	1	1	0	0	0	0	0	0	0	0	0	Toraason et al. Curr Biol 2021
62	Wild Type	pmyo2/3	NCO	10-22 hrs.	1	1	0	0	0	0	0	0	0	0	0	0	Toraason et al. Curr Biol 2021
63	Wild Type	pmyo2/3	NCO	10-22 hrs.	1	0	0	0	0	0	0	0	0	0	0	0	Toraason et al. Curr Biol 2021
64	Wild Type	pmyo2/3	NCO	10-22 hrs.	1	0	0	0	0	0	0	0	0	0	0	0	Toraason et al. Curr Biol 2021
65	Wild Type	pmyo2/3	NCO	10-22 hrs.	1	0	0	0	0	0	0	0	0	0	0	0	Toraason et al. Curr Biol 2021
82	Wild Type	pmyo2/3	NCO	10-22 hrs.	1	0	0	0	0	0	0	0	0	0	0	0	Toraason et al. Curr Biol 2021
84	Wild Type	pmyo2/3	NCO	34-46 hrs.	1	0	0	0	0	0	0	0	0	0	0	0	Toraason et al. Curr Biol 2021
89	Wild Type	pmyo2/3	NCO	34-46 hrs.	1	1	1	0	0	0	0	0	0	0	0	0	Toraason et al. Curr Biol 2021
92	Wild Type	pmyo3	CO	10-22 hrs.	1	1	1	0	0	0	0	0	0	0	0	0	Toraason et al. Curr Biol 2021
93	Wild Type	pmyo2/3	NCO	10-22 hrs.	1	1	1	1	1	1	1	1	1	1	1	1	Toraason et al. Curr Biol 2021
94	Wild Type	pmyo2/3	NCO	10-22 hrs.	1	0	0	0	0	0	0	0	0	0	0	0	Toraason et al. Curr Biol 2021
96	Wild Type	pmyo2/3	NCO	22-34 hrs.	1	0	0	0	0	0	0	0	0	0	0	0	Toraason et al. Curr Biol 2021
97	Wild Type	pmyo2/3	NCO	22-34 hrs.	1	1	0	0	0	0	0	0	0	0	0	0	Toraason et al. Curr Biol 2021
100	Wild Type	pmyo2	NCO	22-34 hrs.	1	0	0	0	0	0	0	0	0	0	0	0	Toraason et al. Curr Biol 2021
101	Wild Type	pmyo2/3	NCO	22-34 hrs.	1	1	0	0	0	0	0	0	0	0	0	0	Toraason et al. Curr Biol 2021
103	Wild Type	pmyo2	NCO	34-46 hrs.	1	1	1	1	1	1	1	1	1	1	1	1	Toraason et al. Curr Biol 2021
104	Wild Type	pmyo2/3	NCO	34-46 hrs.	1	0	0	0	0	0	0	0	0	0	0	0	Toraason et al. Curr Biol 2021
105	Wild Type	pmyo2/3	NCO	34-46 hrs.	1	0	0	0	0	0	0	0	0	0	0	0	Toraason et al. Curr Biol 2021
106	Wild Type	pmyo2	NCO	34-46 hrs.	1	0	0	0	0	0	0	0	0	0	0	0	Toraason et al. Curr Biol 2021
108	Wild Type	pmyo2/3	NCO	34-46 hrs.	1	0	0	0	0	0	0	0	0	0	0	0	Toraason et al. Curr Biol 2021
109	Wild Type	pmyo2/3	NCO	34-46 hrs.	1	0	0	0	0	0	0	0	0	0	0	0	Toraason et al. Curr Biol 2021
110	Wild Type	pmyo2/3	NCO	34-46 hrs.	1	0	0	0	0	0	0	0	0	0	0	0	Toraason et al. Curr Biol 2021
111	Wild Type	pmyo2/3	NCO	34-46 hrs.	1	1	1	0	0	0	0	0	0	0	0	0	Toraason et al. Curr Biol 2021
113	Wild Type	pmyo2/3	NCO	46-58 hrs.	1	1	1	0	0	0	0	0	0	0	0	0	Toraason et al. Curr Biol 2021
114	Wild Type	pmyo2/3	NCO	46-58 hrs.	1	0	0	0	0	0	0	0	0	0	0	0	Toraason et al. Curr Biol 2021
115	Wild Type	pmyo2/3	NCO	46-58 hrs.	1	0	0	0	0	0	0	0	0	0	0	0	Toraason et al. Curr Biol 2021
116	Wild Type	pmyo2/3	NCO	46-58 hrs.	1	0	0	0	0	0	0	0	0	0	0	0	Toraason et al. Curr Biol 2021
117	Wild Type	pmyo2/3	NCO	46-58 hrs.	1	0	0	0	0	0	0	0	0	0	0	0	Toraason et al. Curr Biol 2021
182	Wild Type	pmyo2/3	NCO	10-22 hrs.	1	1	0	0	0	0	0	0	0	0	0	0	Toraason et al. Curr Biol 2021
183	Wild Type	pmyo3	CO	10-22 hrs.	1	1	1	0	0	0	0	0	0	0	0	0	Toraason et al. Curr Biol 2021
184	Wild Type	pmyo3	CO	10-22 hrs.	1	1	1	1	1	1	1	1	1	1	1	1	Toraason et al. Curr Biol 2021
185	Wild Type	pmyo2/3	NCO	10-22 hrs.	1	0	0	0	0	0	0	0	0	0	0	0	Toraason et al. Curr Biol 2021
186	Wild Type	pmyo2/3	NCO	10-22 hrs.	1	0	0	0	0	0	0	0	0	0	0	0	Toraason et al. Curr Biol 2021
187	Wild Type	pmyo2/3	NCO	10-22 hrs.	1	0	0	0	0	0	0	0	0	0	0	0	Toraason et al. Curr Biol 2021
188	Wild Type	pmyo3	CO	10-22 hrs.	1	1	1	1	1	1	1	1	1	1	1	1	Toraason et al. Curr Biol 2021
189	Wild Type	pmyo2/3	NCO	10-22 hrs.	1	0	0	0	0	0	0	0	0	0	0	0	Toraason et al. Curr Biol 2021
190	Wild Type	pmyo2/3	NCO	10-22 hrs.	1	0	0	0	0	0	0	0	0	0	0	0	Toraason et al. Curr Biol 2021
191	Wild Type	pmyo2/3	NCO	22-34 hrs.	1	0	0	0	0	0	0	0	0	0	0	0	Toraason et al. Curr Biol 2021
193	Wild Type	pmyo2/3	NCO	22-34 hrs.	1	0	0	0	0	0	0	0	0	0	0	0	Toraason et al. Curr Biol 2021
194	Wild Type	pmyo2/3	NCO	22-34 hrs.	1	0	0	0	0	0	0	0	0	0	0	0	Toraason et al. Curr Biol 2021
195	Wild Type	pmyo2/3	NCO	22-34 hrs.	1	0	0	0	0	0	0	0	0	0	0	0	Toraason et al. Curr Biol 2021
196	Wild Type	pmyo2/3	NCO	22-34 hrs.	1	0	0	0	0	0	0	0	0	0	0	0	Toraason et al. Curr Biol 2021
200	Wild Type	pmyo2/3	NCO	34-46 hrs.	1	0	0	0	0	0	0	0	0	0	0	0	Toraason et al. Curr Biol 2021
201	Wild Type	pmyo2/3	NCO	34-46 hrs.	1	1	0	0	0	0	0	0	0	0	0	0	Toraason et al. Curr Biol 2021
202	Wild Type	pmyo2/3	NCO	34-46 hrs.	1	1	1	0	0	0	0	0	0	0	0	0	Toraason et al. Curr Biol 2021
203	Wild Type	pmyo2/3	NCO	46-58 hrs.	1	0	0	0	0	0	0	0	0	0	0	0	Toraason et al. Curr Biol 2021
204	Wild Type	pmyo2/3	NCO	46-58 hrs.	1	1	0	0	0	0	0	0	0	0	0	0	Toraason et al. Curr Biol 2021
205	Wild Type	pmyo2/3	NCO	46-58 hrs.	1	0	0	0	0	0	0	0	0	0	0	0	Toraason et al. Curr Biol 2021
206	Wild Type	pmyo2/3	NCO	46-58 hrs.	1	0	0	0	0	0	0	0	0	0	0	0	Toraason et al. Curr Biol 2021
207	Wild Type	pmyo2/3	NCO	46-58 hrs.	1	0	0	0	0	0	0	0	0	0	0	0	Toraason et al. Curr Biol 2021
208	Wild Type	pmyo2/3	NCO	46-58 hrs.	1	0	0	0	0	0	0	0	0	0	0	0	Toraason et al. Curr Biol 2021
354	Wild Type	pmyo2/3	NCO	10-22 hrs.	1	1	1	1	1	1	1	1	1	1	1	1	Toraason et al. Curr Biol 2021
355	Wild Type	pmyo2/3	NCO	10-22 hrs.	1	0	0	0	0	0	0	0	0	0	0	0	Toraason et al. Curr Biol 2021
357	Wild Type	pmyo2/3	NCO	10-22 hrs.	1	0	0	0	0	0	0	0	0	0	0	0	Toraason et al. Curr Biol 2021
358	Wild Type	pmyo3	CO	10-22 hrs.	1	1	1	0	0	0	0	0	0	0	0	0	Toraason et al. Curr Biol 2021
359	Wild Type	pmyo2/3	NCO	22-34 hrs.	1	0	0	0	0	0	0	0	0	0	0	0	Toraason et al. Curr Biol 2021
360	Wild Type	pmyo2/3	NCO	22-34 hrs.	1	0	0	0	0	0	0	0	0	0	0	0	Toraason et al. Curr Biol 2021
361	Wild Type	pmyo2/3	NCO	22-34 hrs.	1	0	0	0	0	0	0	0	0	0	0	0	Toraason et al. Curr Biol 2021
363	Wild Type	pmyo2/3	NCO	22-34 hrs.	1	0	0	0	0	0	0	0	0	0	0	0	Toraason et al. Curr Biol 2021
365	Wild Type	pmyo2/3	NCO	34-46 hrs.	1	0	0	0	0	0	0	0	0	0	0	0	Toraason et al. Curr Biol 2021
367	Wild Type	pmyo2/3	NCO	34-46 hrs.	1	0	0	0	0	0	0	0	0	0	0	0	Toraason et al. Curr Biol 2021
368	Wild Type	pmyo2/3	NCO	34-46 hrs.	1	0	0	0	0	0	0	0	0	0	0	0	Toraason et al. Curr Biol 2021
371	Wild Type	pmyo2/3	NCO	22-34 hrs.	1	1	0	0	0	0	0	0	0	0	0	0	Toraason et al. Curr Biol 2021
372	Wild Type	pmyo2/3	NCO	34-46 hrs.	1	0	0	0	0	0	0	0	0	0	0	0	Toraason et al. Curr Biol 2021
373	Wild Type	pmyo2/3	NCO	46-58 hrs.	1	0	0	0	0	0	0	0	0	0	0	0	Toraason et al. Curr Biol 2021
395	Wild Type	pmyo2/3	NCO	10-22 hrs.	1	0	0	0	0	0	0	0	0	0	0	0	Toraason et al. Curr Biol 2021
396	Wild Type	pmyo2/3	NCO	10-22 hrs.	1	0	0	0	0	0	0	0	0	0	0	0	Toraason et al. Curr Biol 2021
397	Wild Type	pmyo2/3	NCO	10-22 hrs.	1	0	0	0	0	0	0	0	0	0	0	0	Toraason et al. Curr Biol 2021
418	Wild Type	pmyo2/3	NCO	22-34 hrs.	1	1	1	0	0	0	0	0	0	0	0	0	Toraason et al. Curr Biol 2021
425	Wild Type	pmyo2/3	NCO	46-58 hrs.	1	0	0	0	0	0	0	0	0	0	0	0	Toraason et al. Curr Biol 2021
473	smc-5(ok2421)	pmyo2/3	NCO	10-22 hrs.	1	1	1	0	0	0	0	0	0	0	0	0	This study
474	smc-5(ok2421)	pmyo3	CO	10-22 hrs.	1	1	1	0	0	0	0	0	0	0	0	0	This study
475	smc-5(ok2421)	pmyo2/3	NCO	22-34 hrs.	1	0	0	0	0	0	0	0	0	0	0	0	This study
476	smc-5(ok2421)	pmyo2/3	NCO	22-34 hrs.	1	1	1	0	0	0	0	0	0	0	0	0	This study
477	smc-5(ok2421)	pmyo2/3	NCO	22-34 hrs.	1	0	0	0	0	0	0	0	0	0	0	0	This study
478	smc-5(ok2421)	pmyo3	CO	22-34 hrs.	1	1	1	1	1	1	1	1	1	1	1	1	This study
479	smc-5(ok2421)	pmyo3	CO	22-34 hrs.	1	1	1	0	0	0	0	0	0	0	0	0	This study
480	smc-5(ok2421)	pmyo3	CO	22-34 hrs.	1	1	1	1	1	1	1	1	1	1	1	1	This study
481	smc-5(ok2421)	pmyo2/3	NCO	34-46 hrs.	1	0	0	0	0	0	0	0	0	0	0	0	This study
482	smc-5(ok2421)	pmyo2/3	NCO	46-58 hrs.	1	1	1	0	0	0	0	0	0	0	0	0	This study
483	smc-5(ok2421)	pmyo2/3	NCO	10-22 hrs.	1	0	0	0	0	0	0	0	0	0	0	0	This study
484	smc-5(ok2421)	pmyo2/3	NCO	10-22 hrs.	1	0	0	0	0	0	0	0	0	0	0	0	This study
485	smc-5(ok2421)	pmyo2/3	NCO	10-22 hrs.	1	0	0	0	0	0	0	0	0	0	0	0	This study
486	smc-5(ok2421)	pmyo2/3	NCO	10-22 hrs.	1	0	0	0	0	0	0	0	0	0	0	0	This study
487	smc-5(ok2421)	pmyo3	CO	10-22 hrs.	1	1	1	1	1	1	1	1	1	1	1	1	This study
488	smc-5(ok2421)	pmyo3	CO	10-22 hrs.	1	1	1	0	0	0	0	0	0	0	0	0	This study
489	smc-5(ok2421)	pmyo3	CO	10-22 hrs.	1	1	1	0	0	0	0	0	0	0	0	0	This study
490	smc-5(ok2421)	pmyo3	CO	10-22 hrs.	1	1	1	1	1	1	1	1	1	1	1	1	This study
491	smc-5(ok2421)	pmyo2/3	NCO	22-34 hrs.	1	1	1	0	0	0	0	0	0	0	0	0	This study
492	smc-5(ok2421)	pmyo2/3	NCO	22-34 hrs.	1	0	0	0	0	0	0	0	0	0	0	0	This study
493	smc-5(ok2421)	pmyo2/3	NCO	22-34 hrs.	1	0	0	0	0	0	0	0	0	0	0	0	This study
494	smc-5(ok2421)	pmyo2/3	NCO	22-34 hrs.	1	1	1	0	0	0	0	0	0	0	0	0	This study
495	smc-5(ok2421)	pmyo2/3	NCO	22-34 hrs.	1	0	0	0	0	0	0	0	0	0	0	0	This study
496	smc-5(ok2421)	pmyo2/3	NCO	22-34 hrs.	1	0	0	0	0	0	0	0	0	0	0	0	This study
497	smc-5(ok2421)	pmyo2/3	NCO	22-34 hrs.	1	1	1	0	0	0	0	0	0	0	0	0	This study
498	smc-5(ok2421)	pmyo2/3	NCO	22-34 hrs.	1	0	0	0	0	0	0	0	0	0	0	0	This study
499	smc-5(ok2421)	pmyo2/3	NCO	22-34 hrs.	1	0	0	0	0	0	0	0	0	0	0	0	This study
500	smc-5(ok2421)	pmyo2/3	NCO	22-34 hrs.	1	0	0	0	0	0	0	0	0	0	0	0	This study
501	smc-5(ok2421)	pmyo2/3	NCO	22-34 hrs.	1	0	0	0	0	0	0	0	0	0	0	0	This study
502	smc-5(ok2421)	pmyo3	CO	22-34 hrs.	1	1	1	0	0	0	0	0	0	0	0	0	This study
503	smc-5(ok2421)	pmyo3	CO	22-34 hrs.	1	1	1	1	1	1	1	1	1	1	1	1	This study
504	smc-5(ok2421)	pmyo3	CO	22-34 hrs.	1	1	1	1	1	1	1	1	1	1	1	1	This study
505	smc-5(ok2421)	pmyo3	CO	22-34 hrs.	1	1	1	0	0	0	0	0	0	0	0	0	This study
506	smc-5(ok2421)	pmyo2/3	NCO	34-46 hrs.	1	0	0	0	0	0	0	0	0	0	0	0	This study
507	smc-5(ok2421)	pmyo2/3	NCO	34-46 hrs.	1	0	0	0	0	0	0	0	0	0	0	0	This study
508	smc-5(ok2421)	pmyo2/3	NCO	34-46 hrs.	1	0	0	0	0	0	0	0	0	0	0	0	This study
509	smc-5(ok2421)	pmyo2/3	NCO	34-46 hrs.	1	0	0	0	0	0	0	0	0	0	0	0	This study
510	smc-5(ok2421)	pmyo2/3	NCO	34-46 hrs.	1	0	0	0	0	0	0	0	0	0	0	0	This study
511	smc-5(ok2421)	pmyo2/3	NCO	34-46 hrs.	1	0	0	0	0	0	0	0	0	0	0	0	This study
512	smc-5(ok2421)	pmyo2/3	NCO	34-46 hrs.	1	0	0	0	0	0	0	0	0	0	0	0	This study
513	smc-5(ok2421)	pmyo3	CO	34-46 hrs.	1	1	1	1	1	1	1	1	1	1	1	1	This study
514	smc-5(ok2421)	pmyo3	CO	34-46 hrs.	1	1	1	1	1	1	1	1	1	1	1	1	This study
515	smc-5(ok2421)	pmyo2/3	NCO	10-22 hrs.	1	0	0	0	0	0	0	0	0	0	0	0	This study
516	smc-5(ok2421)	pmyo2/3	NCO	10-22 hrs.	1	0	0	0	0	0	0	0	0	0	0	0	This study
517	smc-5(ok2421)	pmyo2/3	NCO	10-22 hrs.	1	0	0	0	0	0	0	0	0	0	0	0	This study
518	smc-5(ok2421)	pmyo2/3	NCO	10-22 hrs.	1	1	1	0	0	0	0	0	0	0	0	0	This study
519	smc-5(ok2421)	pmyo3	CO	10-22 hrs.	1	1	1	1	1	1	1	1	1	1	1	1	This study
520	smc-5(ok2421)	pmyo2/3	NCO	22-34 hrs.	1	0	0	0	0	0	0	0	0	0	0	0	This study
521	smc-5(ok2421)	pmyo2/3	NCO	22-34 hrs.	1	0	0	0	0	0	0	0	0	0	0	0	This study
522	smc-5(ok2421)	pmyo2/3	NCO	22-34 hrs.	1	0	0	0	0	0	0	0	0	0	0	0	This study
523	smc-5(ok2421)	pmyo2/3	NCO	22-34 hrs.	1	0	0	0	0	0	0	0	0	0	0	0	This study
524	smc-5(ok2421)	pmyo2/3	NCO	22-34 hrs.	1	0.5	0.5	0	0	0	0	0	0	0	0	0	This study
525	smc-5(ok2421)	pmyo3	CO	22-34 hrs.	1	1	1	1	1	1	1	1	1	1	1	1	This study
526	smc-5(ok2421)	pmyo3	CO	22-34 hrs.	1	1	1	0	0	0	0	0	0	0	0	0	This study
527	smc-5(ok2421)	pmyo2/3	NCO	34-46 hrs.	1	0	0	0	0	0	0	0	0	0	0	0	This study
528	smc-5(ok2421)	pmyo2/3	NCO	34-46 hrs.	1	0	0	0	0	0	0	0	0	0	0	0	This study
529	smc-5(ok2421)	pmyo2/3	NCO	34-46 hrs.	1	0	0	0	0	0	0	0	0	0	0	0	This study
530	smc-5(ok2421)	pmyo3	CO	34-46 hrs.	1	1	1	0	0	0	0	0	0	0	0	0	This study
531	smc-5(ok2421)	pmyo2/3	NCO	46-58 hrs.	1	0	0	0	0	0	0	0	0	0	0	0	This study
532	smc-5(ok2421)	pmyo2/3	NCO	46-58 hrs.	1	0	0	0	0	0	0	0	0	0	0	0	This study
533	smc-5(ok2421)	pmyo2/3	NCO	10-22 hrs.	1	1	1	0	0	0	0	0	0	0	0	0	This study
534	smc-5(ok2421)	pmyo3	CO	10-22 hrs.	1	1	1	0	0	0	0	0	0	0	0	0	This study
535	smc-5(ok2421)	pmyo3	CO	10-22 hrs.	1	1	1	0	0	0	0	0	0	0	0	0	This study
536	smc-5(ok2421)	pmyo2/3	NCO	22-34 hrs.	1	0	0	0	0	0	0	0	0	0	0	0	This study
537	smc-5(ok2421)	pmyo2/3	NCO	22-34 hrs.	1	0	0	0	0	0	0	0	0	0	0	0	This study
538	smc-5(ok2421)	pmyo2/3	NCO	22-34 hrs.	1	0	0	0	0	0	0	0	0	0	0	0	This study
539	smc-5(ok2421)	pmyo2/3	NCO	22-34 hrs.	1	0.5	0	0	0	0	0	0	0	0	0	0	This study
540	smc-5(ok2421)	pmyo2/3	NCO	22-34 hrs.	1	0	0	0	0	0	0	0	0	0	0	0	This study
541	smc-5(ok2421)	pmyo3	CO	22-34 hrs.	1	1	1	0	0	0	0	0	0	0	0	0	This study
542	smc-5(ok2421)	pmyo3	CO	22-34 hrs.	1	1	1	0	0	0	0	0	0	0	0	0	This study
543	smc-5(ok2421)	pmyo3	CO	22-34 hrs.	1	1	1	0	0	0	0	0	0	0	0	0	This study
545	smc-5(ok2421)	pmyo3	CO	22-34 hrs.	1	1	1	0	0	0	0	0	0	0	0	0	This study
546	smc-5(ok2421)	pmyo2/3	NCO	34-46 hrs.	1	0	0	0	0	0	0	0	0	0	0	0	This study
547	smc-5(ok2421)	pmyo2/3	NCO	34-46 hrs.	1	0	0	0	0	0	0	0	0	0	0	0	This study
548	smc-5(ok2421)	pmyo2/3	NCO	34-46 hrs.	1	0	0	0	0	0	0	0	0	0	0	0	This study
549	smc-5(ok2421)	pmyo2/3	NCO	34-46 hrs.	1	0.5	0.5	0	0	0	0	0	0	0	0	0	This study
550	smc-5(ok2421)	pmyo2/3	NCO	34-46 hrs.	1	0	0	0	0	0	0	0	0	0	0	0	This study
551	smc-5(ok2421)	pmyo2/3	NCO	34-46 hrs.	1	0	0	0	0	0	0	0	0	0	0	0	This study
552	smc-5(ok2421)	pmyo3	CO	34-46 hrs.	1	1	1	0	0	0	0	0	0	0	0	0	This study
553	smc-5(ok2421)	pmyo2/3	NCO	46-58 hrs.	1	0	0	0	0	0	0	0	0	0	0	0	This study
554	smc-5(ok2421)	pmyo2/3	NCO	46-58 hrs.	1	0	0	0	0	0	0	0	0	0	0	0	This study
555	smc-5(ok2421)	pmyo3	CO	46-58 hrs.	1	1	1	0	0	0	0	0	0	0	0	0	This study
556	smc-5(ok2421)	pmyo3	CO	46-58 hrs.	1	1	1	1	1	1	1	1	1	1	1	1	This study
557	Wild Type	pmyo3	CO	10-22 hrs.	1	1	1	1	1	1	1	1	1	1	1	1	This study
558	Wild Type	pmyo3	CO	10-22 hrs.	1	1	1	0	0	0	0	0	0	0	0	0	This study
559	Wild Type	pmyo2/3	NCO	22-34 hrs.	1	0	0	0	0	0	0	0	0	0	0	0	This study
560	Wild Type	pmyo2/3	NCO	22-34 hrs.	1	0	0	0	0	0	0	0	0	0	0	0	This study
561	Wild Type	pmyo2/3	NCO	22-34 hrs.	1	0	0	0	0	0	0	0	0	0	0	0	This study
562	Wild Type	pmyo2/3	NCO	22-34 hrs.	1	1	1	0	0	0	0	0	0	0	0	0	This study
563	Wild Type	pmyo2/3	NCO	22-34 hrs.	1	0	0	0	0	0	0	0	0	0	0	0	This study
564	Wild Type	pmyo3	CO	22-34 hrs.	1	1	1	1	1	1	1	1	1	1	1	1	This study
565	Wild Type	pmyo2/3	NCO	34-46 hrs.	1	0.5	0	0	0	0	0	0	0	0	0	0	This study
566	Wild Type	pmyo2/3	NCO	34-46 hrs.	1	0	0	0	0	0	0	0	0	0	0	0	This study
567	Wild Type	pmyo2/3	NCO	34-46 hrs.	1	0	0	0	0	0	0	0	0	0	0	0	This study
568	Wild Type	pmyo2/3	NCO	34-46 hrs.	1	0.5	0	0	0	0	0	0	0	0	0	0	This study
569	Wild Type	pmyo3	CO	34-46 hrs.	1	1	1	0	0	0	0	0	0	0	0	0	This study
570	Wild Type	pmyo3	CO	34-46 hrs.	1	1	1	0	0	0	0	0	0	0	0	0	This study
571	Wild Type	pmyo3	CO	34-46 hrs.	1	1	1	0	0	0	0	0	0	0	0	0	This study
572	Wild Type	pmyo2/3	NCO	46-58 hrs.	1	0	0	0	0	0	0	0	0	0	0	0	This study
573	Wild Type	pmyo2/3	NCO	46-58 hrs.	1	0	0	0	0	0	0	0	0	0	0	0	This study
574	brc-1(xoe4)	pmyo3	CO	10-22 hrs.	1	1	1	0	0	0	0	0	0	0	0	0	This study
575	brc-1(xoe4)	pmyo3	CO	10-22 hrs.	1	1	1	0	0	0	0	0	0	0	0	0	This study
576	brc-1(xoe4)	pmyo2/3	NCO	22-34 hrs.	1	0	0	0	0	0	0	0	0	0	0	0	This study
577	brc-1(xoe4)	pmyo2/3	NCO	22-34 hrs.	1	0	0	0	0	0	0	0	0	0	0	0	This study
578	brc-1(xoe4)	pmyo3	CO	22-34 hrs.	1	1	1	0	0	0	0	0	0	0	0	0	This study
579	brc-1(xoe4)	pmyo3	CO	22-34 hrs.	1	1	1	1	1	1	1	1	1	1	1	1	This study
580	brc-1(xoe4)	pmyo3	CO	22-34 hrs.	1	1	1	0.5	0	0	0	0	0	0	0	0	This study
581	brc-1(xoe4)	pmyo3	CO	22-34 hrs.	1	1	1	0	0	0	0	0	0	0	0	0	This study
582	brc-1(xoe4)	pmyo3	CO	22-34 hrs.	1	1	1	0	0	0	0	0	0	0	0	0	This study
583	brc-1(xoe4)	pmyo3	CO	22-34 hrs.	1	1	1	0	0	0	0	0	0	0	0	0	This study
584	brc-1(xoe4)	pmyo2/3	NCO	34-46 hrs.	1	0	0	0	0	0	0	0	0	0	0	0	This study
585	brc-1(xoe4)	pmyo2/3	NCO	34-46 hrs.	1	0	0	0	0	0	0	0	0	0	0	0	This study
586	brc-1(xoe4)	pmyo2/3	NCO	34-46 hrs.	1	0	0	0	0	0	0	0	0	0	0	0	This study
587	brc-1(xoe4)	pmyo2/3	NCO	34-46 hrs.	1	0	0	0	0	0	0	0	0	0	0	0	This study
588	brc-1(xoe4)	pmyo3	CO	34-46 hrs.	1	1	1	0	0	0	0	0	0	0	0	0	This study
589	brc-1(xoe4)	pmyo3	CO	34-46 hrs.	1	1	1	0	0	0	0	0	0	0	0	0	This study
590	brc-1(xoe4)	pmyo3	CO	34-46 hrs.	1	1	1	1	1	1	1	1	1	1	1	1	This study
591	brc-1(xoe4)	pmyo3	CO	34-46 hrs.	1	1	1	1	1	1	1	1	1	1	1	1	This study
592	brc-1(xoe4)	pmyo2/3	NCO	46-58 hrs.	1	0	0	0	0	0	0	0	0	0	0	0	This study
593	brc-1(xoe4)	pmyo3	CO	46-58 hrs.	1	1	1	0	0	0	0	0	0	0	0	0	This study
594	brc-1(xoe4)	pmyo3	CO	46-58 hrs.	1	1	1	0	0	0	0	0	0	0	0	0	This study
595	brc-1(xoe4)	pmyo3	CO	46-58 hrs.	1	1	1	1	1	1	1	1	1	1	1	1	This study
596	brc-1(xoe4)	pmyo2/3	NCO	10-22 hrs.	1	0	0	0	0	0	0	0	0	0	0	0	This study
597	brc-1(xoe4)	pmyo2/3	NCO	10-22 hrs.	1	0.5	0.5	0	0	0	0	0	0	0	0	0	This study
598	brc-1(xoe4)	pmyo3	CO	10-22 hrs.	1	1	1	0	0	0	0	0	0	0	0	0	This study
599	brc-1(xoe4)	pmyo3	CO	10-22 hrs.	1	1	1	0	0	0	0	0	0	0	0	0	This study
600	brc-1(xoe4)	pmyo3	CO	10-22 hrs.	1	1	1	0	0	0	0	0	0	0	0	0	This study
601	brc-1(xoe4)	pmyo3	CO	10-22 hrs.	1	1	1	1	1	1	1	1	1	1	1	1	This study
602	brc-1(xoe4)	pmyo3	CO	10-22 hrs.	1	1	1	0	0	0	0	0	0	0	0	0	This study
603	brc-1(xoe4)	pmyo2/3	NCO	22-34 hrs.	1	0	0	0	0	0	0	0	0	0	0	0	This study
604	brc-1(xoe4)	pmyo2/3	NCO	22-34 hrs.	1	0	0	0	0	0	0	0	0	0	0	0	This study
605	brc-1(xoe4)	pmyo2/3	NCO	22-34 hrs.	1	0	0	0	0	0	0	0	0	0	0	0	This study
606	brc-1(xoe4)	pmyo3	CO	22-34 hrs.	1	1	1	0	0	0	0	0	0	0	0	0	This study
607	brc-1(xoe4)	pmyo3	CO	22-34 hrs.	1	1	1	0	0	0	0	0	0	0	0	0	This study
608	brc-1(xoe4)	pmyo3	CO	22-34 hrs.	1	1	1	0	0	0	0	0	0	0	0	0	This study
609	brc-1(xoe4)	pmyo3	CO	22-34 hrs.	1	1	1	1	1	1	1	1	1	1	1	1	This study
610	brc-1(xoe4)	pmyo3	CO	22-34 hrs.	1	1	1	0	0	0	0	0	0	0	0	0	This study
611	brc-1(xoe4)	pmyo3	CO	22-34 hrs.	1	1	1	0	0	0	0	0	0	0	0	0	This study
613	brc-1(xoe4)	pmyo3	CO	22-34 hrs.	1	1	1	0	0	0	0	0	0	0	0	0	This study
614	brc-1(xoe4)	pmyo2/3	NCO	34-46 hrs.	1	0	0	0	0	0	0	0	0	0	0	0	This study
615	brc-1(xoe4)	pmyo2/3	NCO	34-46 hrs.	1	0	0	0	0	0	0	0	0	0	0	0	This study
616	brc-1(xoe4)	pmyo2/3	NCO	34-46 hrs.	1	0	0	0	0	0	0	0	0	0	0	0	This study
617	brc-1(xoe4)	pmyo2/3	NCO	34-46 hrs.	1	0	0	0	0	0	0	0	0	0	0	0	This study
618	brc-1(xoe4)	pmyo3	CO	34-46 hrs.	1	1	1	0	0	0	0	0	0	0	0	0	This study
619	brc-1(xoe4)	pmyo3	CO	34-46 hrs.	1	1	1	0	0	0	0	0	0	0	0	0	This study
620	brc-1(xoe4)	pmyo3	CO	34-46 hrs.	1	1	1	0	0	0	0	0	0	0	0	0	This study
621	brc-1(xoe4)	pmyo3	CO	34-46 hrs.	1	1	1	1	1	1	1	1	1	1	1	1	This study
622	brc-1(xoe4)	pmyo3	CO	34-46 hrs.	1	1	1	0	0	0	0	0	0	0	0	0	This study
623	brc-1(xoe4)	pmyo3	CO	34-46 hrs.	1	1	1	0	0	0	0	0	0	0	0	0	This study
624	brc-1(xoe4)	pmyo3	CO	34-46 hrs.	1	1	1	0	0	0	0	0	0	0	0	0	This study
626	brc-1(xoe4)	pmyo2/3	NCO	46-58 hrs.	1	0	0	0	0	0	0	0	0	0	0	0	This study
627	brc-1(xoe4)	pmyo2/3	NCO	46-58 hrs.	1	0	0	0	0	0	0	0	0	0	0	0	This study
628	brc-1(xoe4)	pmyo2/3	NCO	46-58 hrs.	1	0	0	0	0	0	0	0	0	0	0	0	This study
629	brc-1(xoe4)	pmyo3	CO	46-58 hrs.	1	1	1	1	1	1	1	1	1	1	1	1	This study
630	brc-1(xoe4)	pmyo3	CO	46-58 hrs.	1	1	1	1	1	1	1	1	1	1	1	1	This study
631	brc-1(xoe4)	pmyo2/3	NCO	10-22 hrs.	1	0	0	0	0	0	0	0	0	0	0	0	This study
632	brc-1(xoe4)	pmyo2/3	NCO	10-22 hrs.	1	0	0	0	0	0	0	0	0	0	0	0	This study
633	brc-1(xoe4)	pmyo3	CO	10-22 hrs.	1	1	1	1	1	1	1	1	1	1	1	1	This study
634	brc-1(xoe4)	pmyo3	CO	10-22 hrs.	1	1	1	0	0	0	0	0	0	0	0	0	This study
635	brc-1(xoe4)	pmyo3	CO	10-22 hrs.	1	1	1	0	0	0	0	0	0	0	0	0	This study
636	brc-1(xoe4)	pmyo3	CO	10-22 hrs.	1	1	1	0	0	0	0	0	0	0	0	0	This study
637	brc-1(xoe4)	pmyo3	CO	10-22 hrs.	1	1	1	1	1	1	1	1	1	1	1	1	This study
638	brc-1(xoe4)	pmyo2/3	NCO	22-34 hrs.	1	0	0	0	0	0	0	0	0	0	0	0	This study
640	brc-1(xoe4)	pmyo3	CO	22-34 hrs.	1	1	1	0	0	0	0	0	0	0	0	0	This study
641	brc-1(xoe4)	pmyo3	CO	22-34 hrs.	1	1	1	0	0	0	0	0	0	0	0	0	This study
642	brc-1(xoe4)	pmyo3	CO	22-34 hrs.	1	1	1	0	0	0	0	0	0	0	0	0	This study
643	brc-1(xoe4)	pmyo3	CO	22-34 hrs.	1	1	1	0	0	0	0	0	0	0	0	0	This study
645	brc-1(xoe4)	pmyo3	CO	22-34 hrs.	1	1	1	0	0	0	0	0	0	0	0	0	This study
646	brc-1(xoe4)	pmyo3	CO	22-34 hrs.	1	1	1	0	0	0	0	0	0	0	0	0	This study
647	brc-1(xoe4)	pmyo3	CO	22-34 hrs.	1	1	1	1	1	1	1	1	1	1	1	1	This study
648	brc-1(xoe4)	pmyo3	CO	22-34 hrs.	1	1	1	0	0	0	0	0	0	0	0	0	This study
649	brc-1(xoe4)	pmyo3	CO	22-34 hrs.	1	1	1	0	0	0	0	0	0	0	0	0	This study
650	brc-1(xoe4)	pmyo3	CO	22-34 hrs.	1	1	1	0	0	0	0	0	0	0	0	0	This study
651	brc-1(xoe4)	pmyo3	CO	22-34 hrs.	1	1	1	0	0	0	0	0	0	0	0	0	This study
652	brc-1(xoe4)	pmyo2/3	NCO	34-46 hrs.	1	0	0	0	0	0	0	0	0	0	0	0	This study
653	brc-1(xoe4)	pmyo2/3	NCO	34-46 hrs.	1	0	0	0	0	0	0	0	0	0	0	0	This study
654	brc-1(xoe4)	pmyo2/3	NCO	34-46 hrs.	1	1	0	0	0	0	0	0	0	0	0	0	This study
655	brc-1(xoe4)	pmyo2/3	NCO	34-46 hrs.	1	0	0	0	0	0	0	0	0	0	0	0	This study
656	brc-1(xoe4)	pmyo2/3	NCO	34-46 hrs.	1	0	0	0	0	0	0	0	0	0	0	0	This study
657	brc-1(xoe4)	pmyo2/3	NCO	34-46 hrs.	1	0	0	0	0	0	0	0	0	0	0	0	This study
658	brc-1(xoe4)	pmyo3	CO	34-46 hrs.	1	1	1	0	0	0	0	0	0	0	0	0	This study
659	brc-1(xoe4)	pmyo3	CO	34-46 hrs.	1	1	1	0	0	0	0	0	0	0	0	0	This study
660	brc-1(xoe4)	pmyo3	CO	34-46 hrs.	1	1	1	0	0	0	0	0	0	0	0	0	This study
661	brc-1(xoe4)	pmyo3	CO	34-46 hrs.	1	1	1	0	0	0	0	0	0	0	0	0	This study
662	brc-1(xoe4)	pmyo2/3	NCO	10-22 hrs.	1	0	0	0	0	0	0	0	0	0	0	0	This study
663	brc-1(xoe4)	pmyo2/3	NCO	10-22 hrs.	1	0	0	0	0	0	0	0	0	0	0	0	This study
664	brc-1(xoe4)	pmyo2/3	NCO	10-22 hrs.	1	0	0	0	0	0	0	0	0	0	0	0	This study
665	brc-1(xoe4)	pmyo2/3	NCO	10-22 hrs.	1	0	0	0	0	0	0	0	0	0	0	0	This study
666	brc-1(xoe4)	pmyo3	CO	10-22 hrs.	1	1	1	1	1	1	1	1	1	1	1	1	This study
667	brc-1(xoe4)	pmyo3	CO	10-22 hrs.	1	1	1	0	0	0	0	0	0	0	0	0	This study
668	brc-1(xoe4)	pmyo3	CO	10-22 hrs.	1	1	1	1	1	1	1	1	1	1	1	1	This study
669	brc-1(xoe4)	pmyo3	CO	10-22 hrs.	1	1	1	0	0	0	0	0	0	0	0	0	This study
670	brc-1(xoe4)	pmyo2/3	NCO	22-34 hrs.	1	0	0	0	0	0	0	0	0	0	0	0	This study
671	brc-1(xoe4)	pmyo2/3	NCO	22-34 hrs.	1	0	0	0	0	0	0	0	0	0	0	0	This study
672	brc-1(xoe4)	pmyo2/3	NCO	22-34 hrs.	1	0	0	0	0	0	0	0	0	0	0	0	This study
673	brc-1(xoe4)	pmyo3	CO	22-34 hrs.	1	1	1	0	0	0	0	0	0	0	0	0	This study
674	brc-1(xoe4)	pmyo3	CO	22-34 hrs.	1	1	1	1	1	1	1	1	1	1	1	1	This study
675	brc-1(xoe4)	pmyo3	CO	22-34 hrs.	1	1	1	0	0	0	0	0	0	0	0	0	This study
676	brc-1(xoe4)	pmyo3	CO	22-34 hrs.	1	1	1	1	1	1	1	1	1	1	1	1	This study
677	brc-1(xoe4)	pmyo3	CO	22-34 hrs.	1	1	1	0	0	0	0	0	0	0	0	0	This study
678	brc-1(xoe4)	pmyo3	CO	22-34 hrs.	1	1	1	1	1	1	1	1	1	1	1	1	This study
679	brc-1(xoe4)	pmyo3	CO	22-34 hrs.	1	1	1	0	0	0	0	0	0	0	0	0	This study
680	brc-1(xoe4)	pmyo2/3	NCO	34-46 hrs.	1	0	0	0	0	0	0	0	0	0	0	0	This study
681	brc-1(xoe4)	pmyo2/3	NCO	34-46 hrs.	1	0	0	0	0	0	0	0	0	0	0	0	This study
682	brc-1(xoe4)	pmyo3	CO	34-46 hrs.	1	1	1	0	0	0	0	0	0	0	0	0	This study
683	brc-1(xoe4)	pmyo3	CO	34-46 hrs.	1	1	1	0	0	0	0	0	0	0	0	0	This study
684	brc-1(xoe4)	pmyo3	CO	34-46 hrs.	1	1	1	1	1	1	1	1	1	1	1	1	This study
685	Wild Type	pmyo3	CO	10-22 hrs.	1	1	1	0	0	0	0	0	0	0	0	0	This study
686	Wild Type	pmyo3	CO	10-22 hrs.	1	1	1	1	1	1	1	1	1	1	1	1	This study
687	Wild Type	pmyo3	CO	10-22 hrs.	1	1	1	1	1	1	1	1	1	1	1	1	This study
688	Wild Type	pmyo3	CO	10-22 hrs.	1	1	1	0	0	0	0	0	0	0	0	0	This study
689	Wild Type	pmyo3	CO	10-22 hrs.	1	1	1	1	1	1	1	1	1	1	1	1	This study
690	Wild Type	pmyo3	CO	10-22 hrs.	1	1	1	0	0	0	0	0	0	0	0	0	This study
700	Wild Type	pmyo3	CO	22-46hrs.	1	1	1	0	0	0	0	0	0	0	0	0	This study
701	Wild Type	pmyo3	CO	22-46hrs.	1	1	1	0	0	0	0	0	0	0	0	0	This study
702	Wild Type	pmyo3	CO	22-46hrs.	1	1	1	0	0	0	0	0	0	0	0	0	This study
703	Wild Type	pmyo3	CO	22-46hrs.	1	1	1	0	0	0	0	0	0	0	0	0	This study
704	Wild Type	pmyo3	CO	22-46hrs.	1	1	1	0	0	0	0	0	0	0	0	0	This study
705	Wild Type	pmyo3	CO	22-46hrs.	1	1	1	0	0	0	0	0	0	0	0	0	This study
706	Wild Type	pmyo3	CO	46-58 hrs.	1	1	1	0	0	0	0	0	0	0	0	0	This study
707	Wild Type	pmyo3	CO	46-58 hrs.	1	1	1	0	0	0	0	0	0	0	0	0	This study
708	Wild Type	pmyo3	CO	10-22 hrs.	1	1	1	0	0	0	0	0	0	0	0	0	This study
709	Wild Type	pmyo3	CO	10-22 hrs.	1	1	1	0	0	0	0	0	0	0	0	0	This study
710	Wild Type	pmyo3	CO	10-22 hrs.	1	1	1	1	1	1	1	1	1	1	1	1	This study
711	Wild Type	pmyo3	CO	10-22 hrs.	1	1	1	1	1	1	1	1	1	1	1	1	This study
712	Wild Type	pmyo3	CO	22-46hrs.	1	1	1	0	0	0	0	0	0	0	0	0	This study
713	Wild Type	pmyo3	CO	22-46hrs.	1	1	1	0	0	0	0	0	0	0	0	0	This study
714	Wild Type	pmyo3	CO	22-46hrs.	1	0	0	0	0	0	0	0	0	0	0	0	This study
715	Wild Type	pmyo3	CO	22-46hrs.	1	1	1	1	1	1	1	1	1	1	1	1	This study
716	Wild Type	pmyo3	CO	46-58 hrs.	1	1	1	1	1	1	1	1	1	1	1	1	This study
717	Wild Type	pmyo3	CO	46-58 hrs.	1	1	1	1	1	1	1	1	1	1	1	1	This study
718	Wild Type	pmyo3	CO	10-22 hrs.	1	1	1	0	0	0	0	0	0	0	0	0	This study
719	Wild Type	pmyo3	CO	10-22 hrs.	1	1	1	0	0	0	0	0	0	0	0	0	This study
720	Wild Type	pmyo3	CO	10-22 hrs.	1	1	1	1	1	1	1	1	1	1	1	1	This study
721	Wild Type	pmyo3	CO	10-22 hrs.	1	1	1	0	0	0	0	0	0	0	0	0	This study
722	Wild Type	pmyo3	CO	22-46hrs.	1	1	1	0	0	0	0	0	0	0	0	0	This study
723	Wild Type	pmyo3	CO	22-46hrs.	1	1	1	1	1	1	1	1	1	1	1	1	This study
724	Wild Type	pmyo3	CO	22-46hrs.	1	0	0	0	0	0	0	0	0	0	0	0	This study
725	Wild Type	pmyo3	CO	10-22 hrs.	1	1	1	1	1	1	1	1	1	1	1	1	This study
726	Wild Type	pmyo3	CO	10-22 hrs.	1	1	1	1	1	1	1	1	1	1	1	1	This study
727	Wild Type	pmyo3	CO	10-22 hrs.	1	1	1	0	0	0	0	0	0	0	0	0	This study
728	Wild Type	pmyo3	CO	10-22 hrs.	1	1	1	0	0	0	0	0	0	0	0	0	This study
729	Wild Type	pmyo3	CO	10-22 hrs.	1	1	1	0	0	0	0	0	0	0	0	0	This study
730	Wild Type	pmyo3	CO	10-22 hrs.	1	1	1	1	1	1	1	1	1	1	1	1	This study
731	Wild Type	pmyo3	CO	22-46hrs.	1	1	1	0	0	0	0	0	0	0	0	0	This study
732	Wild Type	pmyo3	CO	22-46hrs.	1	0	0	0	0	0	0	0	0	0	0	0	This study
733	Wild Type	pmyo3	CO	22-46hrs.	1	1	1	0	0	0	0	0	0	0	0	0	This study
734	Wild Type	pmyo3	CO	22-46hrs.	1	1	1	0	0	0	0	0	0	0	0	0	This study
735	Wild Type	pmyo3	CO	22-46hrs.	1	1	1	0	0	0	0	0	0	0	0	0	This study
736	Wild Type	pmyo3	CO	22-46hrs.	1	1	1	1	1	1	1	1	1	1	1	1	This study
737	Wild Type	pmyo3	CO	22-46hrs.	1	1	1	0	0	0	0	0	0	0	0	0	This study
738	Wild Type	pmyo3	CO	22-46hrs.	1	1	1	0	0	0	0	0	0	0	0	0	This study
739	Wild Type	pmyo3	CO	46-58 hrs.	1	1	1	0	0	0	0	0	0	0	0	0	This study
