# Supplementary material for: BRCA1/BRC-1 and SMC-5/6 regulate DNA repair pathway engagement during Caenorhabditis elegans meiosis
Source: eLife. 2024 Aug 8;13:e80687. doi: 10.7554/eLife.80687 (PMC11368404; doi:10.7554/eLife.80687)
Supplement: Figure 4—figure supplement 2—source data 1. — The number of hatched (Live), unhatched (Dead), or unfertilized F1 progeny scored in the brood viability experiment data used to generate Figure 4—figure supplement 2B. Wild type and smc-5(ok2421) data is shared with Figure 4—figure supplement 2A–B. [file elife-80687-fig4-figsupp2-data1.xlsx]

## Sheet: Sheet1
Replicate	Worm ID	Genotype	Treatment	Timepoint	Live	Dead	Unfertilized
1	1	N2	0 Rad	10-22hr	119	1	0
1	1	N2	0 Rad	22-46hr	104	4	36
1	1	N2	0 Rad	46-58hr	0	0	0
1	2	N2	0 Rad	10-22hr	129	0	0
1	2	N2	0 Rad	22-46hr	106	6	15
1	2	N2	0 Rad	46-58hr	2	0	24
1	3	N2	0 Rad	10-22hr	99	1	0
1	3	N2	0 Rad	22-46hr	156	12	32
1	3	N2	0 Rad	46-58hr	9	1	82
1	4	N2	0 Rad	10-22hr	120	1	0
1	4	N2	0 Rad	22-46hr	145	1	19
1	4	N2	0 Rad	46-58hr	0	1	32
1	5	N2	0 Rad	10-22hr	96	0	0
1	5	N2	0 Rad	22-46hr	154	6	3
1	5	N2	0 Rad	46-58hr	0	0	3
1	1	N2	5000 Rad	10-22hr	73	6	0
1	1	N2	5000 Rad	22-46hr	152	5	4
1	1	N2	5000 Rad	46-58hr	10	0	41
1	2	N2	5000 Rad	10-22hr	85	3	0
1	2	N2	5000 Rad	22-46hr	146	20	4
1	2	N2	5000 Rad	46-58hr	1	0	16
1	3	N2	5000 Rad	10-22hr	85	2	0
1	3	N2	5000 Rad	22-46hr	157	11	0
1	3	N2	5000 Rad	46-58hr	31	15	22
1	4	N2	5000 Rad	10-22hr	79	2	0
1	4	N2	5000 Rad	22-46hr	141	18	3
1	4	N2	5000 Rad	46-58hr	12	2	40
1	5	N2	5000 Rad	10-22hr	66	1	0
1	5	N2	5000 Rad	22-46hr	159	11	6
1	5	N2	5000 Rad	46-58hr	7	2	28
2	1	N2	0 Rad	10-22hr	85	0	0
2	1	N2	0 Rad	22-46hr	159	1	17
2	1	N2	0 Rad	46-58hr	9	0	23
2	2	N2	0 Rad	10-22hr	67	0	0
2	2	N2	0 Rad	22-46hr	182	3	2
2	2	N2	0 Rad	46-58hr	16	0	3
2	3	N2	0 Rad	10-22hr	87	0	0
2	3	N2	0 Rad	22-46hr	187	0	1
2	3	N2	0 Rad	46-58hr	16	0	10
2	4	N2	0 Rad	10-22hr	81	0	0
2	4	N2	0 Rad	22-46hr	202	1	4
2	4	N2	0 Rad	46-58hr	9	1	16
2	5	N2	0 Rad	10-22hr	80	2	0
2	5	N2	0 Rad	22-46hr	179	4	8
2	5	N2	0 Rad	46-58hr	3	1	10
2	1	N2	5000 Rad	10-22hr	78	4	0
2	1	N2	5000 Rad	22-46hr	147	11	10
2	1	N2	5000 Rad	46-58hr	19	1	45
2	2	N2	5000 Rad	10-22hr	42	16	0
2	2	N2	5000 Rad	22-46hr	107	47	0
2	2	N2	5000 Rad	46-58hr	19	11	22
2	3	N2	5000 Rad	10-22hr	82	2	0
2	3	N2	5000 Rad	22-46hr	167	8	0
2	3	N2	5000 Rad	46-58hr	13	1	35
2	4	N2	5000 Rad	10-22hr	74	1	0
2	4	N2	5000 Rad	22-46hr	166	9	0
2	4	N2	5000 Rad	46-58hr	30	7	9
2	5	N2	5000 Rad	10-22hr	74	2	0
2	5	N2	5000 Rad	22-46hr	175	8	0
2	5	N2	5000 Rad	46-58hr	11	6	46
3	1	N2	0 Rad	10-22hr	48	0	0
3	1	N2	0 Rad	22-46hr	78	3	3
3	1	N2	0 Rad	46-58hr	1	0	4
3	2	N2	0 Rad	10-22hr	83	2	0
3	2	N2	0 Rad	22-46hr	134	0	24
3	2	N2	0 Rad	46-58hr	2	0	15
3	3	N2	0 Rad	10-22hr	75	0	0
3	3	N2	0 Rad	22-46hr	193	6	12
3	3	N2	0 Rad	46-58hr	28	0	13
3	4	N2	0 Rad	10-22hr	83	0	0
3	4	N2	0 Rad	22-46hr	213	0	3
3	4	N2	0 Rad	46-58hr	1	0	6
3	5	N2	0 Rad	10-22hr	90	0	0
3	5	N2	0 Rad	22-46hr	171	2	10
3	5	N2	0 Rad	46-58hr	1	1	3
3	1	N2	5000 Rad	10-22hr	21	36	0
3	1	N2	5000 Rad	22-46hr	57	92	0
3	1	N2	5000 Rad	46-58hr	31	30	2
3	2	N2	5000 Rad	10-22hr	11	46	0
3	2	N2	5000 Rad	22-46hr	55	107	2
3	2	N2	5000 Rad	46-58hr	8	15	0
3	3	N2	5000 Rad	10-22hr	70	0	0
3	3	N2	5000 Rad	22-46hr	133	6	12
3	3	N2	5000 Rad	46-58hr	14	3	28
3	4	N2	5000 Rad	10-22hr	46	20	0
3	4	N2	5000 Rad	22-46hr	127	43	0
3	4	N2	5000 Rad	46-58hr	34	11	1
3	5	N2	5000 Rad	10-22hr	73	7	0
3	5	N2	5000 Rad	22-46hr	134	34	2
3	5	N2	5000 Rad	46-58hr	4	6	44
1	1	smc-5(ok2421)	0 Rad	10-22hr	60	4	0
1	1	smc-5(ok2421)	0 Rad	22-46hr	90	4	14
1	1	smc-5(ok2421)	0 Rad	46-58hr	2	1	6
1	2	smc-5(ok2421)	0 Rad	10-22hr	93	0	0
1	2	smc-5(ok2421)	0 Rad	22-46hr	175	4	0
1	2	smc-5(ok2421)	0 Rad	46-58hr	13	1	11
1	3	smc-5(ok2421)	0 Rad	10-22hr	95	0	0
1	3	smc-5(ok2421)	0 Rad	22-46hr	176	13	2
1	3	smc-5(ok2421)	0 Rad	46-58hr	2	4	47
1	4	smc-5(ok2421)	0 Rad	10-22hr	83	1	0
1	4	smc-5(ok2421)	0 Rad	22-46hr	160	10	19
1	4	smc-5(ok2421)	0 Rad	46-58hr	10	2	58
1	5	smc-5(ok2421)	0 Rad	10-22hr	99	2	0
1	5	smc-5(ok2421)	0 Rad	22-46hr	124	10	38
1	5	smc-5(ok2421)	0 Rad	46-58hr	3	11	126
1	1	smc-5(ok2421)	5000 Rad	10-22hr	1	90	0
1	1	smc-5(ok2421)	5000 Rad	22-46hr	1	126	0
1	1	smc-5(ok2421)	5000 Rad	46-58hr	0	18	19
1	2	smc-5(ok2421)	5000 Rad	10-22hr	0	63	0
1	2	smc-5(ok2421)	5000 Rad	22-46hr	0	115	0
1	2	smc-5(ok2421)	5000 Rad	46-58hr	0	22	6
1	3	smc-5(ok2421)	5000 Rad	10-22hr	0	74	0
1	3	smc-5(ok2421)	5000 Rad	22-46hr	0	116	0
1	3	smc-5(ok2421)	5000 Rad	46-58hr	0	13	12
1	4	smc-5(ok2421)	5000 Rad	10-22hr	0	78	0
1	4	smc-5(ok2421)	5000 Rad	22-46hr	0	115	0
1	4	smc-5(ok2421)	5000 Rad	46-58hr	0	40	1
1	5	smc-5(ok2421)	5000 Rad	10-22hr	0	72	0
1	5	smc-5(ok2421)	5000 Rad	22-46hr	0	109	0
1	5	smc-5(ok2421)	5000 Rad	46-58hr	0	25	1
2	1	smc-5(ok2421)	0 Rad	10-22hr	67	0	0
2	1	smc-5(ok2421)	0 Rad	22-46hr	148	4	10
2	1	smc-5(ok2421)	0 Rad	46-58hr	16	1	30
2	2	smc-5(ok2421)	0 Rad	10-22hr	76	0	0
2	2	smc-5(ok2421)	0 Rad	22-46hr	156	6	0
2	2	smc-5(ok2421)	0 Rad	46-58hr	19	2	17
2	3	smc-5(ok2421)	0 Rad	10-22hr	81	1	0
2	3	smc-5(ok2421)	0 Rad	22-46hr	189	7	0
2	3	smc-5(ok2421)	0 Rad	46-58hr	33	5	5
2	4	smc-5(ok2421)	0 Rad	10-22hr	83	0	0
2	4	smc-5(ok2421)	0 Rad	22-46hr	101	7	8
2	4	smc-5(ok2421)	0 Rad	46-58hr	1	0	0
2	5	smc-5(ok2421)	0 Rad	10-22hr	85	1	0
2	5	smc-5(ok2421)	0 Rad	22-46hr	154	8	6
2	5	smc-5(ok2421)	0 Rad	46-58hr	2	2	41
2	1	smc-5(ok2421)	5000 Rad	10-22hr	3	67	0
2	1	smc-5(ok2421)	5000 Rad	22-46hr	20	117	0
2	1	smc-5(ok2421)	5000 Rad	46-58hr	0	39	1
2	2	smc-5(ok2421)	5000 Rad	10-22hr	3	54	0
2	2	smc-5(ok2421)	5000 Rad	22-46hr	19	100	0
2	2	smc-5(ok2421)	5000 Rad	46-58hr	0	43	0
2	3	smc-5(ok2421)	5000 Rad	10-22hr	4	40	0
2	3	smc-5(ok2421)	5000 Rad	22-46hr	11	25	0
2	3	smc-5(ok2421)	5000 Rad	46-58hr	3	0	0
2	4	smc-5(ok2421)	5000 Rad	10-22hr	1	60	0
2	4	smc-5(ok2421)	5000 Rad	22-46hr	9	92	0
2	4	smc-5(ok2421)	5000 Rad	46-58hr	0	31	5
2	5	smc-5(ok2421)	5000 Rad	10-22hr	1	77	0
2	5	smc-5(ok2421)	5000 Rad	22-46hr	10	114	0
2	5	smc-5(ok2421)	5000 Rad	46-58hr	0	30	0
3	1	smc-5(ok2421)	0 Rad	10-22hr	70	0	0
3	1	smc-5(ok2421)	0 Rad	22-46hr	195	7	0
3	1	smc-5(ok2421)	0 Rad	46-58hr	43	26	8
3	2	smc-5(ok2421)	0 Rad	10-22hr	82	0	0
3	2	smc-5(ok2421)	0 Rad	22-46hr	190	3	0
3	2	smc-5(ok2421)	0 Rad	46-58hr	14	1	26
3	3	smc-5(ok2421)	0 Rad	10-22hr	76	0	0
3	3	smc-5(ok2421)	0 Rad	22-46hr	190	6	2
3	3	smc-5(ok2421)	0 Rad	46-58hr	27	3	18
3	4	smc-5(ok2421)	0 Rad	10-22hr	61	2	0
3	4	smc-5(ok2421)	0 Rad	22-46hr	148	8	1
3	4	smc-5(ok2421)	0 Rad	46-58hr	9	5	1
3	5	smc-5(ok2421)	0 Rad	10-22hr	65	1	0
3	5	smc-5(ok2421)	0 Rad	22-46hr	196	8	3
3	5	smc-5(ok2421)	0 Rad	46-58hr	30	4	28
3	1	smc-5(ok2421)	5000 Rad	10-22hr	3	59	0
3	1	smc-5(ok2421)	5000 Rad	22-46hr	11	122	0
3	1	smc-5(ok2421)	5000 Rad	46-58hr	0	47	0
3	2	smc-5(ok2421)	5000 Rad	10-22hr	2	66	0
3	2	smc-5(ok2421)	5000 Rad	22-46hr	13	124	1
3	2	smc-5(ok2421)	5000 Rad	46-58hr	1	43	1
3	3	smc-5(ok2421)	5000 Rad	10-22hr	0	62	0
3	3	smc-5(ok2421)	5000 Rad	22-46hr	11	125	0
3	3	smc-5(ok2421)	5000 Rad	46-58hr	0	28	0
3	4	smc-5(ok2421)	5000 Rad	10-22hr	1	69	0
3	4	smc-5(ok2421)	5000 Rad	22-46hr	16	117	0
3	4	smc-5(ok2421)	5000 Rad	46-58hr	0	28	12
3	5	smc-5(ok2421)	5000 Rad	10-22hr	4	57	0
3	5	smc-5(ok2421)	5000 Rad	22-46hr	12	121	0
3	5	smc-5(ok2421)	5000 Rad	46-58hr	0	19	21
1	1	smc-5(syb3065[AID::3xFLAG])	0 Rad	10-22hr	70	0	0
1	1	smc-5(syb3065[AID::3xFLAG])	0 Rad	22-46hr	154	0	0
1	1	smc-5(syb3065[AID::3xFLAG])	0 Rad	46-58hr	75	0	0
1	2	smc-5(syb3065[AID::3xFLAG])	0 Rad	10-22hr	74	0	0
1	2	smc-5(syb3065[AID::3xFLAG])	0 Rad	22-46hr	169	0	4
1	2	smc-5(syb3065[AID::3xFLAG])	0 Rad	46-58hr	37	2	21
1	3	smc-5(syb3065[AID::3xFLAG])	0 Rad	10-22hr	79	0	0
1	3	smc-5(syb3065[AID::3xFLAG])	0 Rad	22-46hr	172	1	0
1	3	smc-5(syb3065[AID::3xFLAG])	0 Rad	46-58hr	19	0	4
1	4	smc-5(syb3065[AID::3xFLAG])	0 Rad	10-22hr	75	2	0
1	4	smc-5(syb3065[AID::3xFLAG])	0 Rad	22-46hr	171	1	0
1	4	smc-5(syb3065[AID::3xFLAG])	0 Rad	46-58hr	NA	NA	NA
1	5	smc-5(syb3065[AID::3xFLAG])	0 Rad	10-22hr	76	5	0
1	5	smc-5(syb3065[AID::3xFLAG])	0 Rad	22-46hr	162	9	0
1	5	smc-5(syb3065[AID::3xFLAG])	0 Rad	46-58hr	49	3	5
1	1	smc-5(syb3065[AID::3xFLAG])	5000 Rad	10-22hr	62	2	0
1	1	smc-5(syb3065[AID::3xFLAG])	5000 Rad	22-46hr	124	4	0
1	1	smc-5(syb3065[AID::3xFLAG])	5000 Rad	46-58hr	69	1	0
1	2	smc-5(syb3065[AID::3xFLAG])	5000 Rad	10-22hr	70	1	0
1	2	smc-5(syb3065[AID::3xFLAG])	5000 Rad	22-46hr	130	7	0
1	2	smc-5(syb3065[AID::3xFLAG])	5000 Rad	46-58hr	30	4	7
1	3	smc-5(syb3065[AID::3xFLAG])	5000 Rad	10-22hr	65	1	0
1	3	smc-5(syb3065[AID::3xFLAG])	5000 Rad	22-46hr	121	10	0
1	3	smc-5(syb3065[AID::3xFLAG])	5000 Rad	46-58hr	35	18	8
1	4	smc-5(syb3065[AID::3xFLAG])	5000 Rad	10-22hr	57	3	0
1	4	smc-5(syb3065[AID::3xFLAG])	5000 Rad	22-46hr	117	6	0
1	4	smc-5(syb3065[AID::3xFLAG])	5000 Rad	46-58hr	46	6	0
1	5	smc-5(syb3065[AID::3xFLAG])	5000 Rad	10-22hr	61	1	0
1	5	smc-5(syb3065[AID::3xFLAG])	5000 Rad	22-46hr	55	3	0
1	5	smc-5(syb3065[AID::3xFLAG])	5000 Rad	46-58hr	42	11	0
2	1	smc-5(syb3065[AID::3xFLAG])	0 Rad	10-22hr	55	1	0
2	1	smc-5(syb3065[AID::3xFLAG])	0 Rad	22-46hr	144	4	3
2	1	smc-5(syb3065[AID::3xFLAG])	0 Rad	46-58hr	6	0	6
2	2	smc-5(syb3065[AID::3xFLAG])	0 Rad	10-22hr	78	0	0
2	2	smc-5(syb3065[AID::3xFLAG])	0 Rad	22-46hr	182	3	2
2	2	smc-5(syb3065[AID::3xFLAG])	0 Rad	46-58hr	7	1	4
2	3	smc-5(syb3065[AID::3xFLAG])	0 Rad	10-22hr	69	0	0
2	3	smc-5(syb3065[AID::3xFLAG])	0 Rad	22-46hr	183	0	0
2	3	smc-5(syb3065[AID::3xFLAG])	0 Rad	46-58hr	63	0	1
2	4	smc-5(syb3065[AID::3xFLAG])	0 Rad	10-22hr	64	1	0
2	4	smc-5(syb3065[AID::3xFLAG])	0 Rad	22-46hr	172	3	0
2	4	smc-5(syb3065[AID::3xFLAG])	0 Rad	46-58hr	42	2	2
2	5	smc-5(syb3065[AID::3xFLAG])	0 Rad	10-22hr	77	0	0
2	5	smc-5(syb3065[AID::3xFLAG])	0 Rad	22-46hr	140	2	4
2	5	smc-5(syb3065[AID::3xFLAG])	0 Rad	46-58hr	50	0	7
2	1	smc-5(syb3065[AID::3xFLAG])	5000 Rad	10-22hr	57	2	0
2	1	smc-5(syb3065[AID::3xFLAG])	5000 Rad	22-46hr	123	15	0
2	1	smc-5(syb3065[AID::3xFLAG])	5000 Rad	46-58hr	34	22	0
2	2	smc-5(syb3065[AID::3xFLAG])	5000 Rad	10-22hr	58	3	0
2	2	smc-5(syb3065[AID::3xFLAG])	5000 Rad	22-46hr	104	7	0
2	2	smc-5(syb3065[AID::3xFLAG])	5000 Rad	46-58hr	45	7	0
2	3	smc-5(syb3065[AID::3xFLAG])	5000 Rad	10-22hr	60	2	0
2	3	smc-5(syb3065[AID::3xFLAG])	5000 Rad	22-46hr	110	12	0
2	3	smc-5(syb3065[AID::3xFLAG])	5000 Rad	46-58hr	33	1	0
2	4	smc-5(syb3065[AID::3xFLAG])	5000 Rad	10-22hr	52	0	0
2	4	smc-5(syb3065[AID::3xFLAG])	5000 Rad	22-46hr	111	4	0
2	4	smc-5(syb3065[AID::3xFLAG])	5000 Rad	46-58hr	31	31	0
2	5	smc-5(syb3065[AID::3xFLAG])	5000 Rad	10-22hr	63	1	0
2	5	smc-5(syb3065[AID::3xFLAG])	5000 Rad	22-46hr	115	6	0
2	5	smc-5(syb3065[AID::3xFLAG])	5000 Rad	46-58hr	33	4	0
1	1	smc-5(syb3065);sun-1p::TIR1 + Auxin	2500 Rads	10-22hr	26	29	0
1	2	smc-5(syb3065);sun-1p::TIR1 + Auxin	2500 Rads	10-22hr	13	21	0
1	3	smc-5(syb3065);sun-1p::TIR1 + Auxin	2500 Rads	10-22hr	14	26	0
1	4	smc-5(syb3065);sun-1p::TIR1 + Auxin	2500 Rads	10-22hr	15	21	0
1	5	smc-5(syb3065);sun-1p::TIR1 + Auxin	2500 Rads	10-22hr	18	18	0
1	6	smc-5(syb3065);sun-1p::TIR1 + Auxin	2500 Rads	10-22hr	19	18	0
1	7	smc-5(syb3065);sun-1p::TIR1 + Auxin	2500 Rads	10-22hr	15	31	0
1	8	smc-5(syb3065);sun-1p::TIR1 + Auxin	2500 Rads	10-22hr	28	29	0
1	9	smc-5(syb3065);sun-1p::TIR1 + Auxin	2500 Rads	10-22hr	27	14	0
1	10	smc-5(syb3065);sun-1p::TIR1 + Auxin	2500 Rads	10-22hr	16	19	0
1	1	smc-5(syb3065);sun-1p::TIR1 + Auxin	0 Rads	10-22hr	18	2	0
1	2	smc-5(syb3065);sun-1p::TIR1 + Auxin	0 Rads	10-22hr	29	2	0
1	3	smc-5(syb3065);sun-1p::TIR1 + Auxin	0 Rads	10-22hr	50	3	0
1	4	smc-5(syb3065);sun-1p::TIR1 + Auxin	0 Rads	10-22hr	56	4	0
1	5	smc-5(syb3065);sun-1p::TIR1 + Auxin	0 Rads	10-22hr	51	5	0
1	6	smc-5(syb3065);sun-1p::TIR1 + Auxin	0 Rads	10-22hr	54	3	0
1	7	smc-5(syb3065);sun-1p::TIR1 + Auxin	0 Rads	10-22hr	38	0	0
1	8	smc-5(syb3065);sun-1p::TIR1 + Auxin	0 Rads	10-22hr	18	2	0
1	9	smc-5(syb3065);sun-1p::TIR1 + Auxin	0 Rads	10-22hr	40	1	0
1	10	smc-5(syb3065);sun-1p::TIR1 + Auxin	0 Rads	10-22hr	53	1	0
