# Supplementary material for: BRCA1/BRC-1 and SMC-5/6 regulate DNA repair pathway engagement during Caenorhabditis elegans meiosis
Source: eLife. 2024 Aug 8;13:e80687. doi: 10.7554/eLife.80687 (PMC11368404; doi:10.7554/eLife.80687)
Supplement: Figure 4—figure supplement 3—source data 1. — Summary statistics of Beta-Binomial model parameter estimates (see Materials and methods) output by RStan (see Figure 4—figure supplement 3—source code 1) are provided. [file elife-80687-fig4-figsupp3-data1.xlsx]

## Sheet: Sheet1
							Credible Interval Bounds
Parameter	Genotype	Timepoint	Treatment	mean	se_mean	sd	2.5%	25%	50%	75%	97.5%	n_eff	Rhat
p	N2	Non-IH Window	0 Rads	0.994235	1.13754e-05	0.00208967	0.989527	0.99299	0.994492	0.995747	0.997577	33745.6	0.999971
p	N2	IH Window	0 Rads	0.978156	1.5964e-05	0.00291484	0.972044	0.976295	0.978284	0.980163	0.983594	33338.3	0.999893
p	N2	Non-IH Window	2500 Rads	0.985309	1.95961e-05	0.00353102	0.977758	0.983103	0.985574	0.987811	0.991462	32468.3	0.999907
p	N2	IH Window	2500 Rads	0.952986	2.09772e-05	0.00390667	0.945107	0.95034	0.953111	0.955642	0.960412	34683.1	0.999967
p	N2	Non-IH Window	5000 Rads	0.865529	5.7207e-05	0.0103349	0.844704	0.858725	0.865701	0.872752	0.885036	32637.5	0.999948
p	N2	IH Window	5000 Rads	0.807351	4.15657e-05	0.0074877	0.792481	0.802349	0.80737	0.812432	0.821734	32451	0.999955
p	brc-1(xoe4)	Non-IH Window	0 Rads	0.923332	4.29669e-05	0.00797542	0.907012	0.918081	0.923609	0.928883	0.938231	34454	0.999843
p	brc-1(xoe4)	IH Window	0 Rads	0.921915	3.26386e-05	0.00621868	0.909326	0.917779	0.922123	0.926274	0.933531	36302.3	0.999832
p	brc-1(xoe4)	Non-IH Window	2500 Rads	0.842382	6.90522e-05	0.0126665	0.816446	0.834115	0.842686	0.851021	0.866322	33648.1	0.999906
p	brc-1(xoe4)	IH Window	2500 Rads	0.887512	4.28232e-05	0.00783869	0.871716	0.882339	0.887602	0.892902	0.902356	33506.5	0.999881
p	brc-1(xoe4)	Non-IH Window	5000 Rads	0.492432	8.62724e-05	0.0171122	0.459104	0.480794	0.492385	0.50394	0.526213	39342.8	0.999956
p	brc-1(xoe4)	IH Window	5000 Rads	0.683971	5.49461e-05	0.0103621	0.663672	0.677008	0.683972	0.690978	0.704201	35564.6	0.999822
p	smc-5(ok2421)	Non-IH Window	0 Rads	0.989187	1.62124e-05	0.00301671	0.98259	0.987316	0.989448	0.99134	0.994283	34623.6	0.999846
p	smc-5(ok2421)	IH Window	0 Rads	0.93756	2.44422e-05	0.00452864	0.928308	0.934612	0.937707	0.940623	0.946187	34328.6	0.99989
p	smc-5(ok2421)	Non-IH Window	2500 Rads	0.43327	8.03003e-05	0.0148199	0.404087	0.423391	0.433268	0.443184	0.46244	34061	1.00005
p	smc-5(ok2421)	IH Window	2500 Rads	0.520451	5.47227e-05	0.0104357	0.499907	0.51341	0.52046	0.527576	0.540923	36366.9	0.999882
p	smc-5(ok2421)	Non-IH Window	5000 Rads	0.0237258	2.60016e-05	0.00480045	0.0152005	0.0203466	0.0233893	0.0267366	0.0340937	34085.1	0.999916
p	smc-5(ok2421)	IH Window	5000 Rads	0.0626876	2.8016e-05	0.00523984	0.0528585	0.0590246	0.0625158	0.0662119	0.0732711	34980.3	0.999911
p	smc-5(ok2421);brc-1(xoe4)	Non-IH Window	0 Rads	0.899635	5.57941e-05	0.0103962	0.878139	0.892843	0.899989	0.90682	0.918887	34719.4	0.99992
p	smc-5(ok2421);brc-1(xoe4)	IH Window	0 Rads	0.84458	5.02231e-05	0.00958038	0.825634	0.838215	0.84471	0.851171	0.86263	36387.9	0.999965
p	smc-5(ok2421);brc-1(xoe4)	Non-IH Window	2500 Rads	0.59141	9.33454e-05	0.0172747	0.557596	0.579654	0.591429	0.603143	0.625083	34247.8	0.999948
p	smc-5(ok2421);brc-1(xoe4)	IH Window	2500 Rads	0.442005	6.39986e-05	0.0120887	0.418583	0.433802	0.441945	0.450257	0.465624	35679.4	0.9999
p	smc-5(ok2421);brc-1(xoe4)	Non-IH Window	5000 Rads	0.215395	7.5083e-05	0.0142476	0.187978	0.20578	0.215151	0.224802	0.244033	36008	0.999942
p	smc-5(ok2421);brc-1(xoe4)	IH Window	5000 Rads	0.214951	5.46871e-05	0.0103117	0.195351	0.207958	0.214842	0.221822	0.235254	35554	0.999837
p	smc-5(ok2421);brc-1(xoe4) MATED	Non-IH Window	0 Rads	0.658713	0.000202479	0.0371179	0.583982	0.633495	0.659444	0.684613	0.729255	33605.2	1
p	smc-5(ok2421);brc-1(xoe4) MATED	IH Window	0 Rads	0.448768	0.000113003	0.0212877	0.407315	0.434297	0.448523	0.463227	0.490319	35487.7	0.999917
p	smc-5(ok2421);brc-1(xoe4) MATED	Non-IH Window	2500 Rads	0.598723	0.000257538	0.0473902	0.504721	0.566769	0.599332	0.631036	0.690647	33860.6	0.999974
p	smc-5(ok2421);brc-1(xoe4) MATED	IH Window	2500 Rads	0.313538	0.000128163	0.0239181	0.267144	0.297406	0.312941	0.329318	0.361588	34827.9	0.999861
p	smc-5(ok2421);brc-1(xoe4) MATED	Non-IH Window	5000 Rads	0.069889	8.98767e-05	0.0161704	0.0417513	0.0584296	0.068629	0.0800884	0.104612	32370.4	0.999845
p	smc-5(ok2421);brc-1(xoe4) MATED	IH Window	5000 Rads	0.108534	7.18289e-05	0.013084	0.0838593	0.0994743	0.10813	0.117085	0.135339	33180.4	0.999853
p	smc-5(ok2421);brc-1(xoe4);lig-4(ok716)	Non-IH Window	0 Rads	0.822227	6.63242e-05	0.0127225	0.796401	0.813821	0.822443	0.830888	0.846178	36796.1	0.999868
p	smc-5(ok2421);brc-1(xoe4);lig-4(ok716)	IH Window	0 Rads	0.758978	4.81423e-05	0.00896702	0.741178	0.753004	0.759065	0.765105	0.776212	34693.1	0.999824
p	smc-5(ok2421);brc-1(xoe4);lig-4(ok716)	Non-IH Window	2500 Rads	0.619129	9.53161e-05	0.0179779	0.583327	0.607078	0.61925	0.631305	0.653935	35575.1	0.999889
p	smc-5(ok2421);brc-1(xoe4);lig-4(ok716)	IH Window	2500 Rads	0.357726	5.66491e-05	0.0110852	0.336023	0.350288	0.357694	0.36517	0.379528	38291.4	0.999863
p	smc-5(ok2421);brc-1(xoe4);lig-4(ok716)	Non-IH Window	5000 Rads	0.0983804	5.9169e-05	0.0111458	0.0777773	0.0906432	0.0979343	0.105663	0.121335	35483.8	0.999967
p	smc-5(ok2421);brc-1(xoe4);lig-4(ok716)	IH Window	5000 Rads	0.125307	4.7326e-05	0.00888422	0.108511	0.119229	0.125124	0.13121	0.143366	35240.2	0.999876
p	smc-5(ok2421);brc-1(xoe4);polq-1(tm2572)	Non-IH Window	0 Rads	0.721185	0.000122803	0.0234774	0.673957	0.705664	0.721669	0.736985	0.765887	36549.6	1
p	smc-5(ok2421);brc-1(xoe4);polq-1(tm2572)	IH Window	0 Rads	0.586495	0.00010468	0.0187465	0.549289	0.574003	0.586498	0.599065	0.623324	32071.1	0.999965
p	smc-5(ok2421);brc-1(xoe4);polq-1(tm2572)	Non-IH Window	2500 Rads	0.0575406	5.85488e-05	0.0104989	0.0386842	0.0501721	0.0570399	0.0643369	0.0796642	32154.9	0.999935
p	smc-5(ok2421);brc-1(xoe4);polq-1(tm2572)	IH Window	2500 Rads	0.143651	6.90121e-05	0.0132222	0.118782	0.134391	0.143394	0.152488	0.170373	36707.5	0.999883
p	smc-5(ok2421);brc-1(xoe4);polq-1(tm2572)	Non-IH Window	5000 Rads	0.00929565	3.34079e-05	0.00557088	0.00164214	0.00517085	0.00824941	0.0123732	0.0228208	27806.8	0.999987
p	smc-5(ok2421);brc-1(xoe4);polq-1(tm2572)	IH Window	5000 Rads	0.0461718	4.46231e-05	0.0080981	0.0315905	0.0405374	0.0457012	0.0513307	0.0634647	32934.2	0.999954
p	smc-5(ok2421);brc-1(xoe4);polq-1(tm2572) MATED	Non-IH Window	0 Rads	0.449769	0.000193989	0.0353664	0.380464	0.426077	0.449446	0.473381	0.520331	33237.5	0.999899
p	smc-5(ok2421);brc-1(xoe4);polq-1(tm2572) MATED	IH Window	0 Rads	0.191105	8.01233e-05	0.0151346	0.162486	0.180568	0.190966	0.201217	0.22138	35680.2	0.999886
p	smc-5(ok2421);brc-1(xoe4);polq-1(tm2572) MATED	Non-IH Window	2500 Rads	0.0694304	0.000140979	0.0238871	0.0300605	0.0523099	0.0669574	0.0841568	0.121818	28709	0.999968
p	smc-5(ok2421);brc-1(xoe4);polq-1(tm2572) MATED	IH Window	2500 Rads	0.201908	0.000105087	0.0191376	0.166105	0.18865	0.201533	0.214395	0.240707	33164.5	0.999908
p	smc-5(ok2421);brc-1(xoe4);polq-1(tm2572) MATED	Non-IH Window	5000 Rads	0.0427572	7.47384e-05	0.0131754	0.0206352	0.0332403	0.0415552	0.0508285	0.0719295	31077.2	0.999906
p	smc-5(ok2421);brc-1(xoe4);polq-1(tm2572) MATED	IH Window	5000 Rads	0.0415562	4.25334e-05	0.00798302	0.0273679	0.0359021	0.0410335	0.0466571	0.0584275	35226.9	0.999831
p	polq-1(tm2572)	Non-IH Window	0 Rads	0.973899	3.67284e-05	0.00659684	0.959468	0.969816	0.974414	0.978607	0.985206	32260.2	0.99984
p	polq-1(tm2572)	IH Window	0 Rads	0.952041	3.01449e-05	0.00546145	0.940806	0.948555	0.952246	0.955806	0.962082	32823.8	0.999981
p	polq-1(tm2572)	Non-IH Window	2500 Rads	0.910814	8.55497e-05	0.0156605	0.877996	0.900598	0.911649	0.921797	0.938909	33510.2	0.999881
p	polq-1(tm2572)	IH Window	2500 Rads	0.900263	4.13578e-05	0.00743269	0.885304	0.895388	0.900388	0.905376	0.914396	32298.1	0.999846
p	polq-1(tm2572)	Non-IH Window	5000 Rads	0.620472	0.000142903	0.0278421	0.564777	0.601647	0.620796	0.639373	0.674887	37959.6	0.999854
p	polq-1(tm2572)	IH Window	5000 Rads	0.528537	8.25157e-05	0.0158805	0.49753	0.517783	0.52869	0.539177	0.559235	37038.6	0.999949
p	polq-1(tm2572) MATED	Non-IH Window	0 Rads	0.970297	6.52401e-05	0.0113921	0.94432	0.963565	0.971717	0.978596	0.988324	30491.3	1.00006
p	polq-1(tm2572) MATED	IH Window	0 Rads	0.980653	2.91526e-05	0.00534307	0.969024	0.977331	0.981122	0.984534	0.989702	33591.3	1.00002
p	polq-1(tm2572) MATED	Non-IH Window	2500 Rads	0.945853	6.53868e-05	0.0115583	0.920989	0.938515	0.946753	0.953979	0.966323	31247.2	0.999884
p	polq-1(tm2572) MATED	IH Window	2500 Rads	0.943537	3.19579e-05	0.00597951	0.931437	0.939531	0.943707	0.947712	0.954738	35008.6	0.999872
p	polq-1(tm2572) MATED	Non-IH Window	5000 Rads	0.936307	7.02715e-05	0.0123862	0.909922	0.928362	0.937077	0.945011	0.958369	31068.3	0.999947
p	polq-1(tm2572) MATED	IH Window	5000 Rads	0.921673	4.17506e-05	0.00784284	0.905572	0.916529	0.92195	0.927096	0.936281	35287.5	0.999896
alpha	N2	Non-IH Window	0 Rads	57.8072	0.202321	32.9813	7.40273	32.7766	53.7817	78.3056	131.246	26573.9	0.999916
alpha	N2	IH Window	0 Rads	60.8818	0.231953	33.6264	8.74899	35.4882	56.811	82.3333	134.849	21016.5	0.999968
alpha	N2	Non-IH Window	2500 Rads	60.4431	0.21593	32.8413	8.77893	35.5726	57.218	80.9538	134.032	23132.2	0.999976
alpha	N2	IH Window	2500 Rads	62.0713	0.242801	33.2476	10.024	36.8037	58.1295	83.4585	135.376	18750.8	1.00001
alpha	N2	Non-IH Window	5000 Rads	61.9161	0.253114	32.2643	11.1893	37.345	58.3752	82.2676	134.198	16248.5	0.999946
alpha	N2	IH Window	5000 Rads	60.9681	0.242876	32.0622	11.2633	36.784	57.2765	81.2021	133.213	17426.8	0.999904
alpha	brc-1(xoe4)	Non-IH Window	0 Rads	62.0123	0.248986	32.662	10.7487	37.3693	58.2286	82.8124	134.212	17208.2	0.999895
alpha	brc-1(xoe4)	IH Window	0 Rads	62.4569	0.237333	32.3368	10.9261	38.1132	58.8146	82.9525	134.235	18564.3	1.00001
alpha	brc-1(xoe4)	Non-IH Window	2500 Rads	61.0578	0.270684	32.2728	10.3714	36.7411	57.3054	81.2557	133.284	14215.1	1.00014
alpha	brc-1(xoe4)	IH Window	2500 Rads	62.2918	0.256169	32.3815	11.0336	37.8417	58.5658	82.579	134.323	15978.7	1.00023
alpha	brc-1(xoe4)	Non-IH Window	5000 Rads	43.6312	0.190481	23.104	7.51968	26.2901	40.94	58.0025	95.6055	14712	1.00004
alpha	brc-1(xoe4)	IH Window	5000 Rads	56.8654	0.231083	29.3102	10.1687	34.8386	53.6609	75.2028	122.275	16088	0.99994
alpha	smc-5(ok2421)	Non-IH Window	0 Rads	59.2229	0.222774	33.3697	7.89245	33.6476	55.4566	80.5812	133.33	22437.5	0.999991
alpha	smc-5(ok2421)	IH Window	0 Rads	61.9496	0.248308	32.8358	9.98145	37.3375	58.2774	82.4393	134.566	17487	0.999964
alpha	smc-5(ok2421)	Non-IH Window	2500 Rads	38.2558	0.16955	20.5537	6.72012	22.6845	35.7145	50.7745	84.5615	14695.4	1.00018
alpha	smc-5(ok2421)	IH Window	2500 Rads	46.0834	0.19985	24.3553	8.26592	27.5021	42.87	61.7724	100.436	14851.8	0.99991
alpha	smc-5(ok2421)	Non-IH Window	5000 Rads	2.45433	0.0103835	1.56459	0.32764	1.29421	2.15139	3.27084	6.30498	22704.7	1.0001
alpha	smc-5(ok2421)	IH Window	5000 Rads	5.18212	0.0236445	3.07397	0.779242	2.88795	4.66845	6.9517	12.4509	16902.1	0.999955
alpha	smc-5(ok2421);brc-1(xoe4)	Non-IH Window	0 Rads	62.2677	0.260369	32.7165	10.3865	37.5377	58.5365	82.9552	135.276	15789	0.999816
alpha	smc-5(ok2421);brc-1(xoe4)	IH Window	0 Rads	61.7987	0.249972	32.0411	11.1532	37.9621	57.9123	82.0585	133.865	16429.9	1.00007
alpha	smc-5(ok2421);brc-1(xoe4)	Non-IH Window	2500 Rads	51.1386	0.225562	27.2214	9.22951	30.557	47.7066	67.9755	112.363	14564.2	0.999863
alpha	smc-5(ok2421);brc-1(xoe4)	IH Window	2500 Rads	39.5719	0.163439	20.9887	7.04453	23.9011	37.0664	52.3472	87.688	16491.6	1.00001
alpha	smc-5(ok2421);brc-1(xoe4)	Non-IH Window	5000 Rads	17.5044	0.0819611	9.87865	2.71654	10.1113	16.1063	23.3615	40.2963	14527.1	0.999906
alpha	smc-5(ok2421);brc-1(xoe4)	IH Window	5000 Rads	17.4902	0.0799255	9.61585	2.87008	10.29	16.1173	23.3007	39.3798	14474.5	1.00026
alpha	smc-5(ok2421);brc-1(xoe4) MATED	Non-IH Window	0 Rads	55.6918	0.226328	29.3722	10.0924	33.7452	51.8347	74.0351	121.505	16842.1	0.999932
alpha	smc-5(ok2421);brc-1(xoe4) MATED	IH Window	0 Rads	39.7853	0.171503	21.3954	7.0117	23.7148	36.9644	52.8139	87.8478	15563.2	1.00002
alpha	smc-5(ok2421);brc-1(xoe4) MATED	Non-IH Window	2500 Rads	51.5991	0.213806	27.0938	9.39433	30.9929	48.1509	68.55	112.918	16058.3	1.00019
alpha	smc-5(ok2421);brc-1(xoe4) MATED	IH Window	2500 Rads	26.922	0.116121	14.7218	4.70404	15.7968	25.0313	35.5731	61.4098	16073.1	0.99999
alpha	smc-5(ok2421);brc-1(xoe4) MATED	Non-IH Window	5000 Rads	5.72586	0.0277659	3.64112	0.789416	3.02598	5.00997	7.64655	14.6781	17196.8	1.00034
alpha	smc-5(ok2421);brc-1(xoe4) MATED	IH Window	5000 Rads	8.61178	0.0385874	4.99624	1.39321	4.88233	7.81347	11.4328	20.5798	16764.7	1.00027
alpha	smc-5(ok2421);brc-1(xoe4);lig-4(ok716)	Non-IH Window	0 Rads	60.5916	0.264382	32.476	10.3842	36.0003	56.8125	80.732	133.916	15089	1.00053
alpha	smc-5(ok2421);brc-1(xoe4);lig-4(ok716)	IH Window	0 Rads	59.573	0.253504	31.0682	10.2782	36.1199	56.0435	79.5078	128.053	15019.7	0.999925
alpha	smc-5(ok2421);brc-1(xoe4);lig-4(ok716)	Non-IH Window	2500 Rads	52.9674	0.236146	28.214	8.87006	31.694	49.9957	70.487	116.183	14274.8	1.00007
alpha	smc-5(ok2421);brc-1(xoe4);lig-4(ok716)	IH Window	2500 Rads	31.0095	0.13563	16.9074	5.49344	18.2	28.6576	41.4401	69.7122	15539.7	0.999958
alpha	smc-5(ok2421);brc-1(xoe4);lig-4(ok716)	Non-IH Window	5000 Rads	7.84123	0.0332719	4.51678	1.30488	4.48441	7.08946	10.3781	18.4135	18429	0.999909
alpha	smc-5(ok2421);brc-1(xoe4);lig-4(ok716)	IH Window	5000 Rads	9.86377	0.0423246	5.60332	1.61053	5.69291	8.98068	13.1949	22.888	17526.9	1.00007
alpha	smc-5(ok2421);brc-1(xoe4);polq-1(tm2572)	Non-IH Window	0 Rads	58.2506	0.254283	30.4798	10.2417	35.189	54.6707	77.3614	126.281	14367.8	1.00001
alpha	smc-5(ok2421);brc-1(xoe4);polq-1(tm2572)	IH Window	0 Rads	51.1547	0.2091	26.742	9.02743	30.9489	47.7732	68.0165	110.708	16356	0.999933
alpha	smc-5(ok2421);brc-1(xoe4);polq-1(tm2572)	Non-IH Window	2500 Rads	4.83492	0.021585	2.9646	0.740672	2.6336	4.28286	6.45964	11.9959	18863.8	0.999921
alpha	smc-5(ok2421);brc-1(xoe4);polq-1(tm2572)	IH Window	2500 Rads	11.451	0.0507093	6.5045	1.88368	6.55098	10.4599	15.2832	26.5249	16453.3	0.999898
alpha	smc-5(ok2421);brc-1(xoe4);polq-1(tm2572)	Non-IH Window	5000 Rads	1.37227	0.00719394	1.02403	0.151297	0.632692	1.13268	1.83478	3.99682	20262.4	1.00003
alpha	smc-5(ok2421);brc-1(xoe4);polq-1(tm2572)	IH Window	5000 Rads	4.05895	0.017986	2.56851	0.573105	2.14517	3.5689	5.45828	10.3227	20393.6	1.00017
alpha	smc-5(ok2421);brc-1(xoe4);polq-1(tm2572) MATED	Non-IH Window	0 Rads	40.3079	0.172188	21.2786	7.22417	24.2119	37.6728	53.4977	88.0249	15271.5	0.999996
alpha	smc-5(ok2421);brc-1(xoe4);polq-1(tm2572) MATED	IH Window	0 Rads	15.4841	0.0688642	8.66403	2.5962	8.96951	14.2213	20.6554	35.6246	15829	0.999954
alpha	smc-5(ok2421);brc-1(xoe4);polq-1(tm2572) MATED	Non-IH Window	2500 Rads	5.66863	0.0308868	3.89077	0.717737	2.79542	4.83666	7.62027	15.51	15868.1	0.999993
alpha	smc-5(ok2421);brc-1(xoe4);polq-1(tm2572) MATED	IH Window	2500 Rads	16.2563	0.0723641	9.17751	2.62874	9.32565	14.8954	21.6794	37.4637	16084.4	0.999871
alpha	smc-5(ok2421);brc-1(xoe4);polq-1(tm2572) MATED	Non-IH Window	5000 Rads	3.79764	0.0186626	2.55717	0.515346	1.93366	3.25238	5.08511	10.3043	18774.8	1.00002
alpha	smc-5(ok2421);brc-1(xoe4);polq-1(tm2572) MATED	IH Window	5000 Rads	3.72293	0.016643	2.32592	0.554627	1.97262	3.29809	5.00666	9.27808	19531.1	0.999942
alpha	polq-1(tm2572)	Non-IH Window	0 Rads	61.0237	0.227561	33.2258	9.32869	35.9277	57.0569	82.0513	135.343	21318.4	1.00014
alpha	polq-1(tm2572)	IH Window	0 Rads	61.7321	0.259827	33.1747	9.14655	36.8011	58.2639	82.5146	135.759	16302.2	1.00007
alpha	polq-1(tm2572)	Non-IH Window	2500 Rads	61.559	0.24868	32.8473	10.0733	36.7573	57.9247	81.8781	134.839	17446.9	1.00017
alpha	polq-1(tm2572)	IH Window	2500 Rads	61.6465	0.257082	32.5102	10.5812	37.0616	57.9011	81.969	134.476	15991.8	1
alpha	polq-1(tm2572)	Non-IH Window	5000 Rads	53.166	0.218283	27.9688	9.13288	32.2358	49.8441	70.6619	115.763	16417.6	1.0002
alpha	polq-1(tm2572)	IH Window	5000 Rads	46.7567	0.191859	24.5969	8.36495	28.2044	43.7244	62.4268	101.054	16435.9	1.00005
alpha	polq-1(tm2572) MATED	Non-IH Window	0 Rads	61.2473	0.226968	33.1689	8.89283	36.0568	57.4151	82.4717	134.767	21356.6	1.00033
alpha	polq-1(tm2572) MATED	IH Window	0 Rads	60.6344	0.225239	33.094	8.64895	35.6498	56.7325	81.4437	133.961	21588.1	0.999981
alpha	polq-1(tm2572) MATED	Non-IH Window	2500 Rads	62.1688	0.238836	32.9096	10.3247	37.4011	58.6465	82.6644	134.601	18986.6	0.999973
alpha	polq-1(tm2572) MATED	IH Window	2500 Rads	62.129	0.245446	33.0184	10.1146	37.0319	58.4228	82.8982	135.396	18096.8	0.999976
alpha	polq-1(tm2572) MATED	Non-IH Window	5000 Rads	62.0758	0.251292	33.0218	10.1468	37.0393	58.1878	82.9961	135.51	17268.1	1.00008
alpha	polq-1(tm2572) MATED	IH Window	5000 Rads	62.5778	0.243066	32.7954	10.8083	37.9579	59.0655	82.9862	134.769	18204.4	1.00028
beta	N2	Non-IH Window	0 Rads	1.11538	0.00470797	0.766886	0.138946	0.552583	0.942621	1.49915	3.02651	26533.5	0.999875
beta	N2	IH Window	0 Rads	2.31297	0.0104585	1.48149	0.304082	1.21362	2.02515	3.12539	5.88605	20065.8	1.00001
beta	N2	Non-IH Window	2500 Rads	1.80555	0.00765954	1.17259	0.245551	0.935356	1.57915	2.40927	4.66539	23436.2	0.999883
beta	N2	IH Window	2500 Rads	4.09682	0.0172292	2.49399	0.611645	2.22318	3.65712	5.50773	10.0399	20953.6	1.00004
beta	N2	Non-IH Window	5000 Rads	10.7345	0.0486136	6.0286	1.76786	6.18394	9.80989	14.3976	24.6973	15378.6	1.00002
beta	N2	IH Window	5000 Rads	15.6303	0.0665537	8.6413	2.70753	9.11815	14.4154	20.8687	35.4949	16858.3	0.999983
beta	brc-1(xoe4)	Non-IH Window	0 Rads	6.20486	0.0286126	3.68085	0.966031	3.43594	5.60874	8.27399	15.0018	16549.4	0.999898
beta	brc-1(xoe4)	IH Window	0 Rads	6.36126	0.0273251	3.67524	1.08165	3.60988	5.74383	8.42758	15.0173	18090.4	1.00003
beta	brc-1(xoe4)	Non-IH Window	2500 Rads	12.513	0.0583643	7.10286	1.9562	7.18056	11.521	16.7292	29.0128	14810.6	1.00011
beta	brc-1(xoe4)	IH Window	2500 Rads	8.9918	0.0397158	5.08317	1.46956	5.20195	8.22173	11.9863	21.0079	16381	1.00006
beta	brc-1(xoe4)	Non-IH Window	5000 Rads	44.8997	0.193873	23.8942	7.64138	26.752	42.0487	59.8263	98.1624	15189.7	0.999997
beta	brc-1(xoe4)	IH Window	5000 Rads	27.1857	0.114695	14.4213	4.79042	16.4383	25.4066	36.0027	59.8831	15809.6	1.00008
beta	smc-5(ok2421)	Non-IH Window	0 Rads	1.50768	0.00663606	1.0165	0.195415	0.754435	1.29713	2.03484	4.03413	23463.7	1
beta	smc-5(ok2421)	IH Window	0 Rads	5.19284	0.0227406	3.07882	0.78908	2.88058	4.67915	6.99562	12.5153	18330.1	1.00016
beta	smc-5(ok2421)	Non-IH Window	2500 Rads	49.4727	0.217713	26.2294	8.82661	29.8579	46.2382	65.765	109.185	14514.7	1.00017
beta	smc-5(ok2421)	IH Window	2500 Rads	42.7014	0.184247	22.6642	7.58991	25.4352	39.7763	56.8865	93.439	15131.5	0.999909
beta	smc-5(ok2421)	Non-IH Window	5000 Rads	61.3743	0.214881	32.6565	9.41778	36.9932	57.6119	81.9703	133.169	23096.4	0.99994
beta	smc-5(ok2421)	IH Window	5000 Rads	62.255	0.250512	32.8607	10.249	37.5243	58.5582	83.0344	135.965	17206.6	1.00009
beta	smc-5(ok2421);brc-1(xoe4)	Non-IH Window	0 Rads	7.9849	0.0367409	4.64905	1.16288	4.49468	7.22585	10.6826	18.6833	16011.4	0.999907
beta	smc-5(ok2421);brc-1(xoe4)	IH Window	0 Rads	12.4732	0.0544829	6.93013	2.10145	7.32174	11.4079	16.6129	28.639	16179.4	1.00008
beta	smc-5(ok2421);brc-1(xoe4)	Non-IH Window	2500 Rads	35.9147	0.161315	19.4034	6.21837	21.2941	33.4136	47.5942	80.2593	14468.1	0.999836
beta	smc-5(ok2421);brc-1(xoe4)	IH Window	2500 Rads	49.3531	0.202758	25.7551	8.81196	29.9583	46.2306	65.1478	106.692	16135.1	0.999996
beta	smc-5(ok2421);brc-1(xoe4)	Non-IH Window	5000 Rads	59.9581	0.269414	32.3331	9.6816	35.5617	55.821	80.2413	131.866	14403	0.99992
beta	smc-5(ok2421);brc-1(xoe4)	IH Window	5000 Rads	60.0127	0.258765	31.1827	10.5095	36.2222	56.5803	79.6726	129.714	14521.6	1.00029
beta	smc-5(ok2421);brc-1(xoe4) MATED	Non-IH Window	0 Rads	29.7914	0.130707	16.4945	5.17431	17.388	27.5064	39.5693	67.8554	15925.1	0.999918
beta	smc-5(ok2421);brc-1(xoe4) MATED	IH Window	0 Rads	48.5197	0.207607	25.8137	8.60905	29.0661	45.1279	64.7154	105.95	15460.2	0.99994
beta	smc-5(ok2421);brc-1(xoe4) MATED	Non-IH Window	2500 Rads	35.3283	0.156374	19.4303	6.08339	20.4632	32.6717	47.1057	79.4154	15439.4	1.00015
beta	smc-5(ok2421);brc-1(xoe4) MATED	IH Window	2500 Rads	56.7038	0.232858	29.6986	10.027	34.5591	53.142	75.0041	123.843	16266.4	1.00005
beta	smc-5(ok2421);brc-1(xoe4) MATED	Non-IH Window	5000 Rads	61.7134	0.241538	32.6408	9.98124	36.8676	58.1597	83.2653	133.556	18262.1	1.00017
beta	smc-5(ok2421);brc-1(xoe4) MATED	IH Window	5000 Rads	61.839	0.249566	32.2034	10.6757	37.6143	58.5011	82.1977	132.915	16650.7	1.00029
beta	smc-5(ok2421);brc-1(xoe4);lig-4(ok716)	Non-IH Window	0 Rads	14.1951	0.0665757	8.14678	2.27822	8.07152	12.8697	19.0452	33.1268	14974.1	1.00063
beta	smc-5(ok2421);brc-1(xoe4);lig-4(ok716)	IH Window	0 Rads	19.9287	0.0882383	10.8538	3.43483	11.7314	18.4408	26.5516	44.7268	15130.3	0.999859
beta	smc-5(ok2421);brc-1(xoe4);lig-4(ok716)	Non-IH Window	2500 Rads	33.3287	0.151188	18.1932	5.35621	19.6317	31.2103	44.4105	74.63	14480.5	1.00004
beta	smc-5(ok2421);brc-1(xoe4);lig-4(ok716)	IH Window	2500 Rads	54.1122	0.237769	28.6687	9.45371	32.077	50.5153	72.1061	118.718	14538	0.999932
beta	smc-5(ok2421);brc-1(xoe4);lig-4(ok716)	Non-IH Window	5000 Rads	62.1498	0.234568	32.2292	11.5316	38.0183	58.3556	82.4672	135.055	18878.1	0.99986
beta	smc-5(ok2421);brc-1(xoe4);lig-4(ok716)	IH Window	5000 Rads	61.5174	0.245992	32.1322	10.9723	37.0596	57.7042	81.93	133.715	17062.4	1.00011
beta	smc-5(ok2421);brc-1(xoe4);polq-1(tm2572)	Non-IH Window	0 Rads	23.6424	0.108456	13.0367	4.06355	13.8146	21.8849	31.3669	53.8866	14448.5	1.00003
beta	smc-5(ok2421);brc-1(xoe4);polq-1(tm2572)	IH Window	0 Rads	36.732	0.151698	19.4891	6.54203	22.0378	34.2862	48.8811	80.2152	16505.4	0.999919
beta	smc-5(ok2421);brc-1(xoe4);polq-1(tm2572)	Non-IH Window	2500 Rads	62.333	0.231935	32.5655	10.7117	37.7068	58.5405	82.7763	134.852	19714.3	0.999884
beta	smc-5(ok2421);brc-1(xoe4);polq-1(tm2572)	IH Window	2500 Rads	61.7801	0.254817	32.4749	10.9236	37.1208	58.175	82.1478	134.116	16242	0.999897
beta	smc-5(ok2421);brc-1(xoe4);polq-1(tm2572)	Non-IH Window	5000 Rads	58.6349	0.216943	33.4073	7.29817	33.1772	54.7212	79.7395	134.126	23713.4	0.999889
beta	smc-5(ok2421);brc-1(xoe4);polq-1(tm2572)	IH Window	5000 Rads	61.9801	0.234801	33.3054	10.0297	36.7116	57.7172	82.9853	136.876	20120.1	1.00023
beta	smc-5(ok2421);brc-1(xoe4);polq-1(tm2572) MATED	Non-IH Window	0 Rads	48.8265	0.202923	25.3758	8.93314	29.6482	45.9745	64.8917	105.373	15637.8	1.00007
beta	smc-5(ok2421);brc-1(xoe4);polq-1(tm2572) MATED	IH Window	0 Rads	60.9116	0.247393	31.8388	10.706	36.8509	57.5073	80.7291	132.069	16563.1	0.999911
beta	smc-5(ok2421);brc-1(xoe4);polq-1(tm2572) MATED	Non-IH Window	2500 Rads	61.8095	0.240423	32.7887	9.51993	36.9201	58.2171	82.7197	133.905	18599.3	0.999929
beta	smc-5(ok2421);brc-1(xoe4);polq-1(tm2572) MATED	IH Window	2500 Rads	60.0087	0.249268	31.8919	10.2012	35.7521	56.6455	79.7062	131.968	16369.3	0.999919
beta	smc-5(ok2421);brc-1(xoe4);polq-1(tm2572) MATED	Non-IH Window	5000 Rads	61.8887	0.230437	32.8757	9.89342	37.1242	58.2046	82.6907	135.823	20353.9	1.00001
beta	smc-5(ok2421);brc-1(xoe4);polq-1(tm2572) MATED	IH Window	5000 Rads	62.03	0.230185	32.5284	10.7977	37.4822	58.2715	82.5615	134.461	19969.7	0.999919
beta	polq-1(tm2572)	Non-IH Window	0 Rads	2.60856	0.0122292	1.70714	0.343923	1.33173	2.26155	3.52235	6.79384	19486.8	0.999913
beta	polq-1(tm2572)	IH Window	0 Rads	4.13124	0.0197201	2.52712	0.61068	2.22652	3.68685	5.56231	10.2315	16422.2	1.00019
beta	polq-1(tm2572)	Non-IH Window	2500 Rads	7.11793	0.033352	4.34961	1.00751	3.85748	6.37411	9.56633	17.5311	17008.2	1.00008
beta	polq-1(tm2572)	IH Window	2500 Rads	7.91136	0.035117	4.6013	1.21411	4.44395	7.19564	10.5696	18.614	17168.2	1.00002
beta	polq-1(tm2572)	Non-IH Window	5000 Rads	33.2322	0.139898	17.8739	5.81164	19.8269	30.8107	44.2413	73.7744	16323.7	1.00014
beta	polq-1(tm2572)	IH Window	5000 Rads	41.9711	0.172098	22.1772	7.34265	25.3707	39.1701	56.0808	92.3862	16606	0.999954
beta	polq-1(tm2572) MATED	Non-IH Window	0 Rads	2.87397	0.0145475	2.01878	0.363031	1.39141	2.41976	3.85321	7.96564	19257.5	1.00045
beta	polq-1(tm2572) MATED	IH Window	0 Rads	2.12987	0.00989682	1.41672	0.291596	1.08157	1.83741	2.87624	5.62023	20491.7	1.00021
beta	polq-1(tm2572) MATED	Non-IH Window	2500 Rads	4.58037	0.0216665	2.85799	0.661617	2.4769	4.04591	6.10755	11.5446	17399.7	0.999997
beta	polq-1(tm2572) MATED	IH Window	2500 Rads	4.7501	0.0218227	2.88806	0.707767	2.57266	4.25419	6.34996	11.6203	17514.4	1.00004
beta	polq-1(tm2572) MATED	Non-IH Window	5000 Rads	5.26121	0.0250385	3.27223	0.763658	2.80784	4.66155	7.02903	13.0784	17079.3	1.00011
beta	polq-1(tm2572) MATED	IH Window	5000 Rads	6.3495	0.0276392	3.7336	1.04755	3.547	5.73846	8.44593	15.1322	18247.5	1.00007
phi	N2	Non-IH Window	0 Rads	0.974698	0.000252482	0.0278159	0.913068	0.969299	0.981439	0.989066	0.997008	12137.4	0.999855
phi	N2	IH Window	0 Rads	0.956192	0.000362971	0.0356188	0.8762	0.945835	0.963815	0.976347	0.992245	9629.73	1.00018
phi	N2	Non-IH Window	2500 Rads	0.964498	0.000242644	0.0298619	0.892725	0.956039	0.971243	0.981789	0.994332	15145.9	0.999979
phi	N2	IH Window	2500 Rads	0.932046	0.000286103	0.0379433	0.844519	0.916711	0.938337	0.955828	0.981654	17588.4	0.999859
phi	N2	Non-IH Window	5000 Rads	0.847901	0.000343654	0.0514738	0.734508	0.821151	0.852904	0.880892	0.931681	22435.1	1.00005
phi	N2	IH Window	5000 Rads	0.792644	0.000370558	0.0552255	0.673065	0.762467	0.796358	0.827422	0.89145	22210.9	0.999834
phi	brc-1(xoe4)	Non-IH Window	0 Rads	0.903898	0.000295561	0.0433579	0.806423	0.88382	0.909513	0.931173	0.967564	21520	0.999952
phi	brc-1(xoe4)	IH Window	0 Rads	0.902331	0.000297944	0.0423907	0.804953	0.882312	0.908216	0.929591	0.965629	20242.9	1.00003
phi	brc-1(xoe4)	Non-IH Window	2500 Rads	0.826273	0.000366441	0.0535387	0.7078	0.797218	0.830552	0.86153	0.917311	21346.5	1.00005
phi	brc-1(xoe4)	IH Window	2500 Rads	0.869268	0.000335892	0.0475725	0.766602	0.845178	0.874121	0.899858	0.944782	20059.1	1.00004
phi	brc-1(xoe4)	Non-IH Window	5000 Rads	0.493289	0.000437461	0.065796	0.363899	0.453831	0.492612	0.532511	0.62448	22621.4	0.999902
phi	brc-1(xoe4)	IH Window	5000 Rads	0.675034	0.000400092	0.0606533	0.549753	0.640549	0.67681	0.712484	0.789577	22982	1.00016
phi	smc-5(ok2421)	Non-IH Window	0 Rads	0.968286	0.000295821	0.0315413	0.898226	0.961269	0.975439	0.985082	0.995552	11368.4	0.999973
phi	smc-5(ok2421)	IH Window	0 Rads	0.916884	0.000309082	0.0411363	0.821909	0.89901	0.92313	0.942768	0.974886	17713.5	1.00001
phi	smc-5(ok2421)	Non-IH Window	2500 Rads	0.436321	0.000436576	0.0638617	0.310803	0.397557	0.435798	0.473778	0.56676	21397.5	0.999923
phi	smc-5(ok2421)	IH Window	2500 Rads	0.519088	0.000423908	0.0634597	0.391076	0.481868	0.519639	0.556882	0.648587	22410.5	1.0002
phi	smc-5(ok2421)	Non-IH Window	5000 Rads	0.044575	0.000242567	0.0316979	0.00835759	0.0250647	0.0382916	0.0554145	0.12088	17076.5	1.0002
phi	smc-5(ok2421)	IH Window	5000 Rads	0.0822909	0.000274426	0.0400024	0.0257233	0.0566931	0.0761767	0.0997704	0.174161	21248.1	0.999958
phi	smc-5(ok2421);brc-1(xoe4)	Non-IH Window	0 Rads	0.881477	0.000325171	0.0474637	0.775828	0.858029	0.886785	0.911661	0.95548	21305.9	0.999908
phi	smc-5(ok2421);brc-1(xoe4)	IH Window	0 Rads	0.828539	0.000338171	0.0516787	0.715572	0.799929	0.832531	0.862421	0.91671	23353.5	0.99985
phi	smc-5(ok2421);brc-1(xoe4)	Non-IH Window	2500 Rads	0.586714	0.000428857	0.063975	0.457704	0.547723	0.587671	0.626779	0.711255	22253.4	0.999869
phi	smc-5(ok2421);brc-1(xoe4)	IH Window	2500 Rads	0.445006	0.000411371	0.0622438	0.321594	0.406894	0.444352	0.482241	0.568449	22894.2	0.999932
phi	smc-5(ok2421);brc-1(xoe4)	Non-IH Window	5000 Rads	0.229345	0.000388447	0.0592078	0.12538	0.192247	0.225435	0.261269	0.354711	23232.4	1.00006
phi	smc-5(ok2421);brc-1(xoe4)	IH Window	5000 Rads	0.228131	0.000404524	0.0572884	0.124754	0.192043	0.225097	0.259686	0.348453	20056	0.999869
phi	smc-5(ok2421);brc-1(xoe4) MATED	Non-IH Window	0 Rads	0.651013	0.000448727	0.0694388	0.506042	0.608509	0.652633	0.696607	0.781694	23946.3	1.00001
phi	smc-5(ok2421);brc-1(xoe4) MATED	IH Window	0 Rads	0.450776	0.000441282	0.0655981	0.323532	0.409909	0.450088	0.491121	0.581091	22097.8	1.0001
phi	smc-5(ok2421);brc-1(xoe4) MATED	Non-IH Window	2500 Rads	0.594206	0.000485326	0.0759777	0.442046	0.545451	0.595183	0.644021	0.742146	24507.8	1.00009
phi	smc-5(ok2421);brc-1(xoe4) MATED	IH Window	2500 Rads	0.323049	0.000425412	0.0651946	0.202066	0.282349	0.321121	0.361298	0.456166	23485.8	0.99991
phi	smc-5(ok2421);brc-1(xoe4) MATED	Non-IH Window	5000 Rads	0.0902438	0.000331529	0.0450087	0.0262712	0.0600354	0.0837421	0.111823	0.194318	18431	1.00005
phi	smc-5(ok2421);brc-1(xoe4) MATED	IH Window	5000 Rads	0.127293	0.000343235	0.0496093	0.0496915	0.0948862	0.121602	0.151963	0.239578	20890.2	0.99994
phi	smc-5(ok2421);brc-1(xoe4);lig-4(ok716)	Non-IH Window	0 Rads	0.806679	0.00037484	0.0565342	0.683569	0.77722	0.810954	0.842312	0.90475	22747.4	0.999975
phi	smc-5(ok2421);brc-1(xoe4);lig-4(ok716)	IH Window	0 Rads	0.746635	0.000395468	0.0590041	0.619552	0.714437	0.749798	0.783392	0.853359	22260.9	0.999922
phi	smc-5(ok2421);brc-1(xoe4);lig-4(ok716)	Non-IH Window	2500 Rads	0.613293	0.000419704	0.0642777	0.481512	0.575416	0.614396	0.652599	0.73649	23455	1.00018
phi	smc-5(ok2421);brc-1(xoe4);lig-4(ok716)	IH Window	2500 Rads	0.364966	0.00041849	0.0627067	0.242842	0.326962	0.363904	0.401047	0.49384	22452.1	0.999928
phi	smc-5(ok2421);brc-1(xoe4);lig-4(ok716)	Non-IH Window	5000 Rads	0.116562	0.000295238	0.0452243	0.0453887	0.086531	0.111247	0.139863	0.218039	23463.8	0.999871
phi	smc-5(ok2421);brc-1(xoe4);lig-4(ok716)	IH Window	5000 Rads	0.142428	0.000311068	0.0492535	0.0604166	0.110384	0.137679	0.168472	0.253485	25070.5	1.00004
phi	smc-5(ok2421);brc-1(xoe4);polq-1(tm2572)	Non-IH Window	0 Rads	0.709772	0.000407498	0.0630859	0.577791	0.672949	0.712777	0.749908	0.823934	23967	0.999864
phi	smc-5(ok2421);brc-1(xoe4);polq-1(tm2572)	IH Window	0 Rads	0.581549	0.000424492	0.0644134	0.451064	0.543488	0.582514	0.621348	0.707458	23025.7	0.999891
phi	smc-5(ok2421);brc-1(xoe4);polq-1(tm2572)	Non-IH Window	2500 Rads	0.0773891	0.000265717	0.0395533	0.0214352	0.0512476	0.0713502	0.0953714	0.169489	22157.8	1.00002
phi	smc-5(ok2421);brc-1(xoe4);polq-1(tm2572)	IH Window	2500 Rads	0.160568	0.000359412	0.0529048	0.0725853	0.127164	0.155986	0.187562	0.275181	21667.4	0.999869
phi	smc-5(ok2421);brc-1(xoe4);polq-1(tm2572)	Non-IH Window	5000 Rads	0.0294054	0.000245656	0.0304365	0.00340446	0.0128391	0.0220643	0.0360956	0.0991265	15350.9	1.00004
phi	smc-5(ok2421);brc-1(xoe4);polq-1(tm2572)	IH Window	5000 Rads	0.067025	0.000267207	0.0374519	0.0170796	0.0430487	0.0611563	0.0828576	0.155172	19645	0.999966
phi	smc-5(ok2421);brc-1(xoe4);polq-1(tm2572) MATED	Non-IH Window	0 Rads	0.452271	0.000449472	0.0700433	0.315903	0.408275	0.452402	0.495351	0.592464	24284.4	1.00009
phi	smc-5(ok2421);brc-1(xoe4);polq-1(tm2572) MATED	IH Window	0 Rads	0.20559	0.000351101	0.0560931	0.106251	0.169948	0.202162	0.236126	0.326376	25524.4	0.999903
phi	smc-5(ok2421);brc-1(xoe4);polq-1(tm2572) MATED	Non-IH Window	2500 Rads	0.0892566	0.000355497	0.0487656	0.0216985	0.056592	0.0816998	0.112197	0.201466	18817.3	0.999847
phi	smc-5(ok2421);brc-1(xoe4);polq-1(tm2572) MATED	IH Window	2500 Rads	0.216266	0.000376888	0.0590281	0.111636	0.178161	0.212142	0.249523	0.346512	24529.7	0.999911
phi	smc-5(ok2421);brc-1(xoe4);polq-1(tm2572) MATED	Non-IH Window	5000 Rads	0.0634618	0.000263102	0.0384117	0.0138793	0.0383856	0.0567209	0.0795593	0.153659	21314.7	0.999922
phi	smc-5(ok2421);brc-1(xoe4);polq-1(tm2572) MATED	IH Window	5000 Rads	0.062115	0.000245148	0.035805	0.0149557	0.0386837	0.0558391	0.077788	0.147046	21332.1	0.999881
phi	polq-1(tm2572)	Non-IH Window	0 Rads	0.952438	0.000277424	0.0347891	0.872558	0.940559	0.959343	0.973548	0.991266	15725.3	1.0002
phi	polq-1(tm2572)	IH Window	0 Rads	0.930597	0.00033694	0.0408566	0.838528	0.915454	0.937433	0.955161	0.981503	14703.5	0.99995
phi	polq-1(tm2572)	Non-IH Window	2500 Rads	0.891064	0.000334751	0.048706	0.78187	0.868188	0.897217	0.9225	0.963237	21170.1	1.00016
phi	polq-1(tm2572)	IH Window	2500 Rads	0.881163	0.000343107	0.0473766	0.773968	0.858364	0.886594	0.911214	0.955088	19066.4	0.999918
phi	polq-1(tm2572)	Non-IH Window	5000 Rads	0.614378	0.000424385	0.0662492	0.478511	0.574627	0.615943	0.656024	0.743092	24369.2	0.999981
phi	polq-1(tm2572)	IH Window	5000 Rads	0.526724	0.000432549	0.0648205	0.397692	0.488387	0.526994	0.565217	0.654697	22457.1	1.00007
phi	polq-1(tm2572) MATED	Non-IH Window	0 Rads	0.94895	0.000263457	0.0368435	0.865258	0.935472	0.956392	0.97196	0.990684	19557.1	1.00005
phi	polq-1(tm2572) MATED	IH Window	0 Rads	0.959555	0.000254665	0.0323975	0.883865	0.949777	0.966401	0.978667	0.993291	16184	0.999872
phi	polq-1(tm2572) MATED	Non-IH Window	2500 Rads	0.925568	0.000275497	0.0396371	0.832742	0.907914	0.932158	0.95154	0.979956	20700	0.999945
phi	polq-1(tm2572) MATED	IH Window	2500 Rads	0.923132	0.000316754	0.0407994	0.831489	0.906144	0.929179	0.948656	0.978178	16590.6	0.999919
phi	polq-1(tm2572) MATED	Non-IH Window	5000 Rads	0.915935	0.00029683	0.0433626	0.818699	0.896787	0.922267	0.943887	0.975801	21341.1	0.999991
phi	polq-1(tm2572) MATED	IH Window	5000 Rads	0.902165	0.000304823	0.0444046	0.80318	0.881523	0.908031	0.930725	0.96655	21220.8	1.00014
lambda	N2	Non-IH Window	0 Rads	58.9226	0.204725	33.2785	8.02831	33.6184	54.948	79.5626	133.412	26423.2	0.999915
lambda	N2	IH Window	0 Rads	63.1947	0.238793	34.4394	9.60953	37.3236	58.9488	85.0628	139.45	20800.1	0.999968
lambda	N2	Non-IH Window	2500 Rads	62.2486	0.220565	33.4018	9.58861	36.9411	58.9861	83.0706	137.209	22933.2	0.999975
lambda	N2	IH Window	2500 Rads	66.1681	0.255979	34.981	11.1403	39.556	61.9572	88.5739	142.811	18674.7	1.00001
lambda	N2	Non-IH Window	5000 Rads	72.6506	0.295996	37.3456	14.0556	44.3109	68.549	96.3218	155.877	15918.7	0.999945
lambda	N2	IH Window	5000 Rads	76.5985	0.303145	39.7744	15.0289	46.506	72.1024	101.562	166.16	17215	0.999921
lambda	brc-1(xoe4)	Non-IH Window	0 Rads	68.2172	0.273502	35.4874	12.4033	41.3566	64.0811	90.7492	147.367	16835.5	0.999895
lambda	brc-1(xoe4)	IH Window	0 Rads	68.8182	0.258966	35.1626	12.9183	42.3853	64.7931	91.0758	147.156	18436.4	1
lambda	brc-1(xoe4)	Non-IH Window	2500 Rads	73.5709	0.323773	38.4063	13.1094	44.7755	69.1053	97.4271	159.318	14071	1.00014
lambda	brc-1(xoe4)	IH Window	2500 Rads	71.2836	0.289831	36.5638	13.3545	43.6506	67.0928	94.3586	152.244	15915.3	1.00022
lambda	brc-1(xoe4)	Non-IH Window	5000 Rads	88.5309	0.378354	45.969	16.3597	53.9441	83.5056	117.717	190.592	14761.6	1.00002
lambda	brc-1(xoe4)	IH Window	5000 Rads	84.0511	0.339882	42.7872	16.1326	51.9855	79.3835	110.883	179.386	15847.9	0.999983
lambda	smc-5(ok2421)	Non-IH Window	0 Rads	60.7306	0.226706	33.8287	8.64446	34.885	56.9464	82.3818	135.732	22266.1	0.999992
lambda	smc-5(ok2421)	IH Window	0 Rads	67.1425	0.266002	35.094	11.4817	40.8828	63.2273	89.1084	144.636	17405.8	0.999978
lambda	smc-5(ok2421)	Non-IH Window	2500 Rads	87.7285	0.381464	45.7938	16.4587	53.0584	82.3281	116.034	191.375	14411.4	1.00018
lambda	smc-5(ok2421)	IH Window	2500 Rads	88.7847	0.378747	46.0705	16.948	53.8251	82.9167	118.232	191.461	14796.1	0.999899
lambda	smc-5(ok2421)	Non-IH Window	5000 Rads	63.8287	0.220896	33.5222	10.3722	38.792	60.0748	84.9698	137.596	23029.6	0.999941
lambda	smc-5(ok2421)	IH Window	5000 Rads	67.4371	0.269493	35.1288	11.6094	40.9974	63.4563	89.6608	145.386	16991.5	1.00008
lambda	smc-5(ok2421);brc-1(xoe4)	Non-IH Window	0 Rads	70.2526	0.29172	36.4481	12.4168	42.8577	66.0186	93.2172	151.677	15610.5	0.999822
lambda	smc-5(ok2421);brc-1(xoe4)	IH Window	0 Rads	74.2719	0.299659	38.0207	14.2096	45.8215	69.5806	98.5316	159.114	16098.5	1.00009
lambda	smc-5(ok2421);brc-1(xoe4)	Non-IH Window	2500 Rads	87.0533	0.380653	45.5911	15.9914	52.594	81.6598	115.248	189.1	14345	0.999851
lambda	smc-5(ok2421);brc-1(xoe4)	IH Window	2500 Rads	88.925	0.360927	45.7707	16.8387	54.5129	83.9301	117.355	192.028	16081.9	1.00001
lambda	smc-5(ok2421);brc-1(xoe4)	Non-IH Window	5000 Rads	77.4625	0.345598	41.2422	13.1658	46.4138	72.215	103.137	169.501	14241	0.99991
lambda	smc-5(ok2421);brc-1(xoe4)	IH Window	5000 Rads	77.5029	0.332708	39.8372	14.4455	47.3091	73.0737	102.403	166.636	14336.7	1.00031
lambda	smc-5(ok2421);brc-1(xoe4) MATED	Non-IH Window	0 Rads	85.4832	0.349363	44.4266	16.404	52.1246	79.8689	113.397	184.949	16170.9	0.999925
lambda	smc-5(ok2421);brc-1(xoe4) MATED	IH Window	0 Rads	88.305	0.372532	46.1116	16.5329	53.8004	82.4255	117.536	191.394	15321.2	0.999973
lambda	smc-5(ok2421);brc-1(xoe4) MATED	Non-IH Window	2500 Rads	86.9274	0.362979	44.7426	16.6687	52.8282	81.8736	115.364	186.313	15194.3	1.00019
lambda	smc-5(ok2421);brc-1(xoe4) MATED	IH Window	2500 Rads	83.6257	0.340801	43.2748	15.8555	51.134	78.6391	109.837	181.691	16123.9	1.00003
lambda	smc-5(ok2421);brc-1(xoe4) MATED	Non-IH Window	5000 Rads	67.4392	0.262647	35.2131	11.5825	40.6684	63.5548	90.6083	145.286	17974.8	1.00019
lambda	smc-5(ok2421);brc-1(xoe4) MATED	IH Window	5000 Rads	70.4508	0.281757	36.2061	13.0979	43.1347	66.5858	93.1762	150.531	16512.5	1.00031
lambda	smc-5(ok2421);brc-1(xoe4);lig-4(ok716)	Non-IH Window	0 Rads	74.7867	0.325719	39.6643	13.7562	44.7379	69.7861	99.6353	163.523	14829.1	1.00057
lambda	smc-5(ok2421);brc-1(xoe4);lig-4(ok716)	IH Window	0 Rads	79.5017	0.336111	40.9743	14.6787	48.5946	74.8179	105.653	170.168	14861.4	0.999906
lambda	smc-5(ok2421);brc-1(xoe4);lig-4(ok716)	Non-IH Window	2500 Rads	86.296	0.38175	45.3893	15.4198	52.0732	81.2235	114.853	187.327	14136.7	1.00007
lambda	smc-5(ok2421);brc-1(xoe4);lig-4(ok716)	IH Window	2500 Rads	85.1217	0.367992	44.6302	16.0339	51.0247	79.6274	113.253	185.382	14708.9	0.999942
lambda	smc-5(ok2421);brc-1(xoe4);lig-4(ok716)	Non-IH Window	5000 Rads	69.991	0.262037	35.8201	13.7571	43.1833	65.7865	92.3906	150.825	18686.5	0.999866
lambda	smc-5(ok2421);brc-1(xoe4);lig-4(ok716)	IH Window	5000 Rads	71.3812	0.282597	36.801	13.6926	43.4637	67.0501	94.6257	153.617	16958.3	1.00011
lambda	smc-5(ok2421);brc-1(xoe4);polq-1(tm2572)	Non-IH Window	0 Rads	81.8931	0.356223	42.3747	15.1813	49.9637	77.0785	108.258	176.401	14150.4	1.00002
lambda	smc-5(ok2421);brc-1(xoe4);polq-1(tm2572)	IH Window	0 Rads	87.8867	0.354346	45.1642	16.3555	53.7664	82.652	116.382	188.573	16245.5	0.999925
lambda	smc-5(ok2421);brc-1(xoe4);polq-1(tm2572)	Non-IH Window	2500 Rads	67.1679	0.248071	34.618	12.1799	41.1114	63.0312	89.2575	143.933	19473.8	0.999886
lambda	smc-5(ok2421);brc-1(xoe4);polq-1(tm2572)	IH Window	2500 Rads	73.2311	0.300576	38.0354	13.9999	44.2996	69.1636	96.8794	157.498	16012.8	0.999894
lambda	smc-5(ok2421);brc-1(xoe4);polq-1(tm2572)	Non-IH Window	5000 Rads	60.0072	0.221015	33.84	7.95475	34.1665	56.0062	81.5259	136.283	23443.2	0.999894
lambda	smc-5(ok2421);brc-1(xoe4);polq-1(tm2572)	IH Window	5000 Rads	66.039	0.247576	35.0615	11.2939	39.558	61.5826	88.1283	144.565	20056	1.00023
lambda	smc-5(ok2421);brc-1(xoe4);polq-1(tm2572) MATED	Non-IH Window	0 Rads	89.1344	0.366798	45.2527	17.3313	54.9604	84.1284	118.101	189.047	15220.8	1.00004
lambda	smc-5(ok2421);brc-1(xoe4);polq-1(tm2572) MATED	IH Window	0 Rads	76.3957	0.309859	39.4965	14.0809	46.4856	72.1672	100.92	164.201	16247.6	0.999921
lambda	smc-5(ok2421);brc-1(xoe4);polq-1(tm2572) MATED	Non-IH Window	2500 Rads	67.4782	0.263537	35.3852	11.085	40.6895	63.7634	89.8332	144.979	18028.5	0.999936
lambda	smc-5(ok2421);brc-1(xoe4);polq-1(tm2572) MATED	IH Window	2500 Rads	76.265	0.315614	40.011	13.6909	45.6799	71.9502	100.871	166.84	16071.1	0.99991
lambda	smc-5(ok2421);brc-1(xoe4);polq-1(tm2572) MATED	Non-IH Window	5000 Rads	65.6864	0.243026	34.4776	11.26	39.675	61.7299	87.4243	142.991	20126.5	1.00002
lambda	smc-5(ok2421);brc-1(xoe4);polq-1(tm2572) MATED	IH Window	5000 Rads	65.753	0.243039	34.0291	12.1358	40.0576	61.8738	87.1735	141.033	19604.3	0.999923
lambda	polq-1(tm2572)	Non-IH Window	0 Rads	63.6323	0.235665	34.1848	10.1317	37.8553	59.608	85.3737	139.729	21041.4	1.00013
lambda	polq-1(tm2572)	IH Window	0 Rads	65.8634	0.275413	34.9326	10.5417	39.5523	62.1473	87.857	143.61	16087.6	1.00008
lambda	polq-1(tm2572)	Non-IH Window	2500 Rads	68.6769	0.276179	36.1953	11.943	41.2697	64.6792	91.3244	149.181	17176.1	1.00017
lambda	polq-1(tm2572)	IH Window	2500 Rads	69.5579	0.286572	36.2047	12.6097	42.1945	65.3401	92.4437	150.801	15961.1	1
lambda	polq-1(tm2572)	Non-IH Window	5000 Rads	86.3981	0.351177	44.6372	15.8833	52.9561	81.1151	114.821	185.525	16156.2	1.00019
lambda	polq-1(tm2572)	IH Window	5000 Rads	88.7278	0.356856	45.744	16.8768	54.4316	83.3023	118.173	189.938	16431.7	1
lambda	polq-1(tm2572) MATED	Non-IH Window	0 Rads	64.1213	0.236215	34.3071	9.91418	38.0942	60.2042	86.0486	140.187	21093.7	1.00036
lambda	polq-1(tm2572) MATED	IH Window	0 Rads	62.7642	0.232067	33.825	9.55131	37.2581	58.681	84.1661	137.729	21244.6	0.999992
lambda	polq-1(tm2572) MATED	Non-IH Window	2500 Rads	66.7492	0.255006	34.8582	11.6213	40.6198	62.9753	88.3908	143.493	18685.7	0.999976
lambda	polq-1(tm2572) MATED	IH Window	2500 Rads	66.8791	0.262602	35.1001	11.3772	40.2846	62.869	88.9106	144.846	17865.7	0.999982
lambda	polq-1(tm2572) MATED	Non-IH Window	5000 Rads	67.337	0.270253	35.348	11.6762	40.5984	63.0836	89.6004	146.092	17107.6	1.00009
lambda	polq-1(tm2572) MATED	IH Window	5000 Rads	68.9273	0.267368	35.6293	12.685	42.0417	65.144	91.1061	147.616	17758.1	1.00027
gamma	N2	Non-IH Window	0 Rads	1		0	1	1	1	1	1
gamma	N2	IH Window	0 Rads	1		0	1	1	1	1	1
gamma	N2	Non-IH Window	2500 Rads	0.991026	2.2804e-05	0.00410498	0.982642	0.98837	0.991175	0.993811	0.998698	32404.2	0.999858
gamma	N2	IH Window	2500 Rads	0.974277	2.65261e-05	0.00494972	0.964562	0.970938	0.97428	0.977627	0.984011	34818.9	0.99993
gamma	N2	Non-IH Window	5000 Rads	0.870552	5.81009e-05	0.0105536	0.849267	0.863576	0.870721	0.87778	0.890454	32994.3	0.99997
gamma	N2	IH Window	5000 Rads	0.825387	4.39316e-05	0.00799998	0.809677	0.82006	0.825387	0.830838	0.840757	33160.8	0.9999
gamma	brc-1(xoe4)	Non-IH Window	0 Rads	1		0	1	1	1	1	1
gamma	brc-1(xoe4)	IH Window	0 Rads	1		0	1	1	1	1	1
gamma	brc-1(xoe4)	Non-IH Window	2500 Rads	0.912396	8.57861e-05	0.0158226	0.880942	0.901921	0.912428	0.923138	0.943369	34019.2	0.99988
gamma	brc-1(xoe4)	IH Window	2500 Rads	0.962726	5.83481e-05	0.0106971	0.941732	0.955602	0.962773	0.969895	0.983837	33610.5	0.999884
gamma	brc-1(xoe4)	Non-IH Window	5000 Rads	0.533363	9.67857e-05	0.0191546	0.496018	0.520285	0.533289	0.54623	0.571448	39167.5	0.999932
gamma	brc-1(xoe4)	IH Window	5000 Rads	0.741937	6.60345e-05	0.0123723	0.717974	0.733456	0.741826	0.750429	0.7661	35104.2	0.999828
gamma	smc-5(ok2421)	Non-IH Window	0 Rads	1		0	1	1	1	1	1
gamma	smc-5(ok2421)	IH Window	0 Rads	1		0	1	1	1	1	1
gamma	smc-5(ok2421)	Non-IH Window	2500 Rads	0.43801	8.15463e-05	0.0150443	0.408508	0.427881	0.438057	0.448067	0.467807	34035.7	1.00005
gamma	smc-5(ok2421)	IH Window	2500 Rads	0.555124	6.01031e-05	0.0113951	0.532797	0.54749	0.555088	0.562808	0.57755	35945.1	0.999894
gamma	smc-5(ok2421)	Non-IH Window	5000 Rads	0.0239854	2.62882e-05	0.00485354	0.0153672	0.0205605	0.023647	0.0270311	0.0344596	34087.6	0.999915
gamma	smc-5(ok2421)	IH Window	5000 Rads	0.0668639	2.99449e-05	0.00559649	0.0563629	0.0629635	0.0666627	0.0706405	0.0781695	34929	0.999912
gamma	smc-5(ok2421);brc-1(xoe4)	Non-IH Window	0 Rads	1		0	1	1	1	1	1
gamma	smc-5(ok2421);brc-1(xoe4)	IH Window	0 Rads	1		0	1	1	1	1	1
gamma	smc-5(ok2421);brc-1(xoe4)	Non-IH Window	2500 Rads	0.657476	0.000111643	0.0206296	0.61746	0.643442	0.657197	0.671608	0.697716	34144.4	0.999905
gamma	smc-5(ok2421);brc-1(xoe4)	IH Window	2500 Rads	0.52341	8.32375e-05	0.0154935	0.493191	0.512841	0.523366	0.533906	0.553936	34646.4	0.999979
gamma	smc-5(ok2421);brc-1(xoe4)	Non-IH Window	5000 Rads	0.239462	8.52483e-05	0.0161644	0.208351	0.228451	0.239189	0.25004	0.272177	35954.1	0.999974
gamma	smc-5(ok2421);brc-1(xoe4)	IH Window	5000 Rads	0.254537	6.65463e-05	0.0125139	0.230753	0.24602	0.254357	0.262872	0.279267	35362.1	0.999853
gamma	smc-5(ok2421);brc-1(xoe4) MATED	Non-IH Window	0 Rads	1		0	1	1	1	1	1
gamma	smc-5(ok2421);brc-1(xoe4) MATED	IH Window	0 Rads	1		0	1	1	1	1	1
gamma	smc-5(ok2421);brc-1(xoe4) MATED	Non-IH Window	2500 Rads	0.911898	0.000493677	0.089546	0.743475	0.850332	0.908738	0.970208	1.09657	32900.8	0.999927
gamma	smc-5(ok2421);brc-1(xoe4) MATED	IH Window	2500 Rads	0.700253	0.000343308	0.0631558	0.581233	0.656883	0.697843	0.741786	0.829355	33842.1	0.999857
gamma	smc-5(ok2421);brc-1(xoe4) MATED	Non-IH Window	5000 Rads	0.106446	0.000141412	0.0254196	0.0628812	0.0883793	0.104243	0.122451	0.161076	32312	0.999835
gamma	smc-5(ok2421);brc-1(xoe4) MATED	IH Window	5000 Rads	0.242374	0.000171421	0.0312885	0.185023	0.220274	0.240892	0.26281	0.30743	33315	0.999902
gamma	smc-5(ok2421);brc-1(xoe4);lig-4(ok716)	Non-IH Window	0 Rads	1		0	1	1	1	1	1
gamma	smc-5(ok2421);brc-1(xoe4);lig-4(ok716)	IH Window	0 Rads	1		0	1	1	1	1	1
gamma	smc-5(ok2421);brc-1(xoe4);lig-4(ok716)	Non-IH Window	2500 Rads	0.753167	0.000133282	0.0246956	0.704746	0.736801	0.753005	0.769737	0.80193	34332	0.999884
gamma	smc-5(ok2421);brc-1(xoe4);lig-4(ok716)	IH Window	2500 Rads	0.471392	8.03634e-05	0.0156317	0.440735	0.460912	0.471292	0.481855	0.502266	37835.2	0.999838
gamma	smc-5(ok2421);brc-1(xoe4);lig-4(ok716)	Non-IH Window	5000 Rads	0.119681	7.26469e-05	0.013691	0.0942488	0.110217	0.119086	0.128639	0.147767	35517.1	0.999972
gamma	smc-5(ok2421);brc-1(xoe4);lig-4(ok716)	IH Window	5000 Rads	0.165124	6.32929e-05	0.0118839	0.142764	0.156985	0.164868	0.17296	0.189328	35253.8	0.999877
gamma	smc-5(ok2421);brc-1(xoe4);polq-1(tm2572)	Non-IH Window	0 Rads	1		0	1	1	1	1	1
gamma	smc-5(ok2421);brc-1(xoe4);polq-1(tm2572)	IH Window	0 Rads	1		0	1	1	1	1	1
gamma	smc-5(ok2421);brc-1(xoe4);polq-1(tm2572)	Non-IH Window	2500 Rads	0.0798647	8.17477e-05	0.0147728	0.0532719	0.0694613	0.0791223	0.0893526	0.111334	32656.7	0.999978
gamma	smc-5(ok2421);brc-1(xoe4);polq-1(tm2572)	IH Window	2500 Rads	0.24519	0.000125732	0.0239803	0.20077	0.228411	0.244637	0.260955	0.294308	36376.2	0.99985
gamma	smc-5(ok2421);brc-1(xoe4);polq-1(tm2572)	Non-IH Window	5000 Rads	0.0129017	4.6468e-05	0.00774388	0.00228946	0.00716109	0.0114154	0.0170947	0.0315783	27772.1	0.999988
gamma	smc-5(ok2421);brc-1(xoe4);polq-1(tm2572)	IH Window	5000 Rads	0.0788015	7.66887e-05	0.0140347	0.0535148	0.0690511	0.0779221	0.0875107	0.108779	33492	0.999946
gamma	smc-5(ok2421);brc-1(xoe4);polq-1(tm2572) MATED	Non-IH Window	0 Rads	1		0	1	1	1	1	1
gamma	smc-5(ok2421);brc-1(xoe4);polq-1(tm2572) MATED	IH Window	0 Rads	1		0	1	1	1	1	1
gamma	smc-5(ok2421);brc-1(xoe4);polq-1(tm2572) MATED	Non-IH Window	2500 Rads	0.155454	0.000326994	0.0553785	0.0654159	0.115342	0.149331	0.188722	0.27969	28681.6	0.999983
gamma	smc-5(ok2421);brc-1(xoe4);polq-1(tm2572) MATED	IH Window	2500 Rads	1.06328	0.000727276	0.132684	0.825864	0.96911	1.05497	1.14744	1.34577	33284.2	0.999908
gamma	smc-5(ok2421);brc-1(xoe4);polq-1(tm2572) MATED	Non-IH Window	5000 Rads	0.0957173	0.000173026	0.0307216	0.0450373	0.0736122	0.0924631	0.114164	0.165148	31525.7	0.999904
gamma	smc-5(ok2421);brc-1(xoe4);polq-1(tm2572) MATED	IH Window	5000 Rads	0.218806	0.000250807	0.0455685	0.140347	0.186856	0.214858	0.246843	0.318528	33010.3	0.99986
gamma	polq-1(tm2572)	Non-IH Window	0 Rads	1		0	1	1	1	1	1
gamma	polq-1(tm2572)	IH Window	0 Rads	1		0	1	1	1	1	1
gamma	polq-1(tm2572)	Non-IH Window	2500 Rads	0.935267	9.60815e-05	0.0172629	0.899982	0.92387	0.935956	0.947211	0.967276	32281.1	0.99987
gamma	polq-1(tm2572)	IH Window	2500 Rads	0.945644	5.30213e-05	0.00953077	0.926669	0.939278	0.945617	0.952074	0.964509	32311.3	0.999885
gamma	polq-1(tm2572)	Non-IH Window	5000 Rads	0.637128	0.000149059	0.028861	0.579506	0.617813	0.637308	0.656628	0.693997	37489	0.999855
gamma	polq-1(tm2572)	IH Window	5000 Rads	0.555179	8.8041e-05	0.016943	0.522305	0.543635	0.555386	0.56653	0.588019	37035	0.999928
gamma	polq-1(tm2572) MATED	Non-IH Window	0 Rads	1		0	1	1	1	1	1
gamma	polq-1(tm2572) MATED	IH Window	0 Rads	1		0	1	1	1	1	1
gamma	polq-1(tm2572) MATED	Non-IH Window	2500 Rads	0.974945	9.53661e-05	0.0166659	0.943092	0.963775	0.974486	0.985572	1.00855	30539.9	1.00001
gamma	polq-1(tm2572) MATED	IH Window	2500 Rads	0.96218	4.34845e-05	0.00804611	0.946668	0.956818	0.962056	0.967446	0.978444	34237.5	0.999978
gamma	polq-1(tm2572) MATED	Non-IH Window	5000 Rads	0.965102	9.56095e-05	0.0170583	0.931996	0.953794	0.964742	0.976134	0.999957	31832.5	0.999925
gamma	polq-1(tm2572) MATED	IH Window	5000 Rads	0.939883	5.09674e-05	0.00947225	0.921189	0.933555	0.939917	0.946237	0.958715	34540	0.999874
lp				-23493.3	0.146932	11.0088	-23516.1	-23500.5	-23492.9	-23485.8	-23472.9	5613.68	1.0002
