# Supplementary material for: BRCA1/BRC-1 and SMC-5/6 regulate DNA repair pathway engagement during Caenorhabditis elegans meiosis
Source: eLife. 2024 Aug 8;13:e80687. doi: 10.7554/eLife.80687 (PMC11368404; doi:10.7554/eLife.80687)
Supplement: Figure 4—source data 1. — The total number of ICR assay progeny with GFP+ or non-GFP+ phenotypes are listed. Wild type data is shared with Figure 1—figure supplement 2, Figure 2, Figure 2—figure supplement 1, Figure 4, and Figure 4—figure supplement 1. [file elife-80687-fig4-data1.xlsx]

## Sheet: Sheet1
Experiment	Timepoint	Replicate	NR	myo-2::GFP+	myo-2+3::GFP+	myo-3::GFP+	Mitotic GFP+	NCO	CO	GFP+ Mutant	Brood Size
Wild Type	10-22hr	1	873	5	5	1	13	10	1		897
Wild Type	10-22hr	2	525	0	0	2	77	0	2		604
Wild Type	10-22hr	3	1174	1	2	2	46	3	2		1225
Wild Type	10-22hr	5	1093	0	6	4	92	6	4		1195
Wild Type	10-22hr	SUM	3665	6	13	9	228	19	9		3921
Wild Type	22-34hr	1	518	1	1	1	6	2	1		527
Wild Type	22-34hr	2	927	0	4	2	54	4	2		987
Wild Type	22-34hr	3	749	0	7	0	17	7	0		773
Wild Type	22-34hr	5	1049	0	8	1	14	8	1		1072
Wild Type	22-34hr	SUM	3243	1	20	4	91	21	4		3359
Wild Type	34-46hr	1	493	0	4	1	6	4	1		504
Wild Type	34-46hr	2	602	0	2	3	25	2	3		632
Wild Type	34-46hr	3	248	0	0	0	2	0	0		250
Wild Type	34-46hr	4	1319	2	6	0	15	8	0		1342
Wild Type	34-46hr	5	918	0	4	0	14	4	0		936
Wild Type	34-46hr	SUM	3580	2	16	4	62	18	4		3664
Wild Type	46-58hr	1	224	0	1	0	1	1	0		226
Wild Type	46-58hr	2	213	0	2	0	9	2	0		224
Wild Type	46-58hr	3	106	0	0	0	1	0	0		107
Wild Type	46-58hr	4	1112	0	5	1	6	5	1		1124
Wild Type	46-58hr	5	685	0	6	0	11	6	0		702
Wild Type	46-58hr	SUM	2340	0	14	1	28	14	1		2383
smc-5(syb3065); brc-1(xoe4)	10-22hr	1	366	0	2	4	1	2	4		373
smc-5(syb3065); brc-1(xoe4)	10-22hr	2	109	0	0	1	0	0	1		110
smc-5(syb3065); brc-1(xoe4)	10-22hr	3	191	0	0	0	0	0	0		191
smc-5(syb3065); brc-1(xoe4)	10-22hr	4	47	0	0	0	0	0	0		47
smc-5(syb3065); brc-1(xoe4)	10-22hr	5	182	0	1	1	0	1	1		184
smc-5(syb3065); brc-1(xoe4)	10-22hr	SUM	895	0	3	6	1	3	6		905
smc-5(syb3065); brc-1(xoe4)	22-34hr	1	238	0	2	6	1	2	6		247
smc-5(syb3065); brc-1(xoe4)	22-34hr	2	178	0	2	2	0	2	2		182
smc-5(syb3065); brc-1(xoe4)	22-34hr	3	135	0	0	0	0	0	0		135
smc-5(syb3065); brc-1(xoe4)	22-34hr	4	57	0	0	0	0	0	0		57
smc-5(syb3065); brc-1(xoe4)	22-34hr	5	112	0	1	3	0	1	3		116
smc-5(syb3065); brc-1(xoe4)	22-34hr	SUM	720	0	5	11	1	5	11		737
smc-5(syb3065); brc-1(xoe4)	34-46hr	1	267	0	4	0	0	4	0		271
smc-5(syb3065); brc-1(xoe4)	34-46hr	2	204	0	2	1	0	2	1		207
smc-5(syb3065); brc-1(xoe4)	34-46hr	3	159	0	0	0	0	0	0		159
smc-5(syb3065); brc-1(xoe4)	34-46hr	4	95	0	1	4	0	1	4		100
smc-5(syb3065); brc-1(xoe4)	34-46hr	5	104	0	0	1	0	0	1		105
smc-5(syb3065); brc-1(xoe4)	34-46hr	SUM	829	0	7	6	0	7	6		842
smc-5(syb3065); brc-1(xoe4)	46-58hr	1	179	0	1	1	0	1	1		181
smc-5(syb3065); brc-1(xoe4)	46-58hr	2	133	0	0	1	0	0	1		134
smc-5(syb3065); brc-1(xoe4)	46-58hr	3	71	0	0	0	0	0	0		71
smc-5(syb3065); brc-1(xoe4)	46-58hr	4	65	0	0	1	0	0	1		66
smc-5(syb3065); brc-1(xoe4)	46-58hr	5	75	0	0	2	0	0	2		77
smc-5(syb3065); brc-1(xoe4)	46-58hr	SUM	523	0	1	5	0	1	5		529
brc-1(xoe4)	10-22hr	1	435	0	0	2	12	0	2		449
brc-1(xoe4)	10-22hr	2	549	0	2	5	19	2	5		575
brc-1(xoe4)	10-22hr	3	572	0	2	5	9	2	5		588
brc-1(xoe4)	10-22hr	4	408	0	4	4	14	4	4		430
brc-1(xoe4)	10-22hr	SUM	1964	0	8	16	54	8	16		2042
brc-1(xoe4)	22-34hr	1	450	1	1	6	1	2	6		459
brc-1(xoe4)	22-34hr	2	502	0	3	8	16	3	8		529
brc-1(xoe4)	22-34hr	3	569	0	1	12	5	2	12	1	588
brc-1(xoe4)	22-34hr	4	425	0	3	7	6	3	7		441
brc-1(xoe4)	22-34hr	SUM	1946	1	8	33	28	10	33		2017
brc-1(xoe4)	34-46hr	1	434	0	4	4	3	4	4		445
brc-1(xoe4)	34-46hr	2	542	0	4	8	6	4	8		560
brc-1(xoe4)	34-46hr	3	567	0	6	5	1	6	5		579
brc-1(xoe4)	34-46hr	4	413	0	2	3	3	2	3		421
brc-1(xoe4)	34-46hr	SUM	1956	0	16	20	13	16	20		2005
brc-1(xoe4)	46-58hr	1	127	0	1	3	1	1	3		132
brc-1(xoe4)	46-58hr	3	192	0	3	2	0	3	2		197
brc-1(xoe4)	46-58hr	4	137	0	0	0	1	0	0		138
brc-1(xoe4)	46-58hr	SUM	456	0	4	5	2	4	5		467
