# Supplementary material for: BRCA1/BRC-1 and SMC-5/6 regulate DNA repair pathway engagement during Caenorhabditis elegans meiosis
Source: eLife. 2024 Aug 8;13:e80687. doi: 10.7554/eLife.80687 (PMC11368404; doi:10.7554/eLife.80687)
Supplement: Figure 4—source data 2. — The number of RAD-51 foci per nucleus scored are listed. [file elife-80687-fig4-data2.xlsx]

## Sheet: Summarized data
	RAD-51 foci
Genotype	Mean	SD	SEM	Bin	N (# nuclei)	# Gonads
N2	0.155	0.466	0.029	Transition Zone	258	8
N2	2.175	2.687	0.23	Early Pachytene	137	8
N2	3.719	3.123	0.27	Early/Mid Pachytene	135	8
N2	2.769	3.193	0.291	Mid Pachytene	121	8
N2	1.053	1.671	0.157	Mid/Late Pachytene	114	8
N2	0.568	1.058	0.109	Late Pachytene	95	8
smc-5	1.092	1.806	0.09	Transition Zone	402	13
smc-5	3.182	3.367	0.17	Early Pachytene	395	13
smc-5	5.96	5.37	0.288	Early/Mid Pachytene	348	13
smc-5	6.568	6.266	0.372	Mid Pachytene	285	13
smc-5	5.516	7.083	0.482	Mid/Late Pachytene	217	13
smc-5	1.217	2.548	0.186	Late Pachytene	189	13
smc-5;brc-1	0.158	0.462	0.033	Transition Zone	202	7
smc-5;brc-1	2.28	2.887	0.215	Early Pachytene	182	7
smc-5;brc-1	4.479	3.846	0.299	Early/Mid Pachytene	167	7
smc-5;brc-1	2.433	3.199	0.256	Mid Pachytene	157	7
smc-5;brc-1	0.877	1.53	0.139	Mid/Late Pachytene	122	7
smc-5;brc-1	2.476	3.91	0.434	Late Pachytene	82	7
brc-1	0.113	0.391	0.026	Transition Zone	231	8
brc-1	1.094	1.686	0.13	Early Pachytene	170	8
brc-1	1.963	2.715	0.215	Early/Mid Pachytene	161	8
brc-1	1.016	1.982	0.146	Mid Pachytene	186	8
brc-1	0.667	1.33	0.106	Mid/Late Pachytene	159	8
brc-1	0.512	1.05	0.096	Late Pachytene	121	8

## Sheet: Per-nucleus data
Genotype	Relative germline position (normalized to pachytene)	RAD-51 foci
brc-1	-0.673866	3
brc-1	-0.65438	0
brc-1	-0.349275	0
brc-1	-0.340534	0
brc-1	-0.328735	0
brc-1	-0.30461	0
brc-1	-0.282199	0
brc-1	-0.281174	0
brc-1	-0.267762	0
brc-1	-0.265366	0
brc-1	-0.26361	1
brc-1	-0.257915	0
brc-1	-0.255756	0
brc-1	-0.251148	0
brc-1	-0.249797	0
brc-1	-0.242165	0
brc-1	-0.240615	0
brc-1	-0.238957	0
brc-1	-0.236575	0
brc-1	-0.230844	0
brc-1	-0.226035	0
brc-1	-0.224296	0
brc-1	-0.21768	0
brc-1	-0.213838	0
brc-1	-0.207363	0
brc-1	-0.205776	0
brc-1	-0.201271	0
brc-1	-0.199157	0
brc-1	-0.193966	0
brc-1	-0.192355	0
brc-1	-0.191628	0
brc-1	-0.19038	0
brc-1	-0.1874	0
brc-1	-0.184706	0
brc-1	-0.183159	0
brc-1	-0.179836	0
brc-1	-0.178212	0
brc-1	-0.17665	0
brc-1	-0.17601	0
brc-1	-0.175679	0
brc-1	-0.174915	0
brc-1	-0.169319	0
brc-1	-0.168631	0
brc-1	-0.163116	0
brc-1	-0.162718	0
brc-1	-0.161404	0
brc-1	-0.158023	0
brc-1	-0.157871	0
brc-1	-0.157614	0
brc-1	-0.157537	0
brc-1	-0.157127	0
brc-1	-0.156677	0
brc-1	-0.15626	0
brc-1	-0.153768	0
brc-1	-0.153733	0
brc-1	-0.152955	0
brc-1	-0.152368	0
brc-1	-0.151901	0
brc-1	-0.151475	0
brc-1	-0.151369	0
brc-1	-0.151225	0
brc-1	-0.149011	0
brc-1	-0.148294	0
brc-1	-0.147921	0
brc-1	-0.146239	0
brc-1	-0.145881	0
brc-1	-0.145383	0
brc-1	-0.14461	0
brc-1	-0.142485	0
brc-1	-0.14248	0
brc-1	-0.142419	0
brc-1	-0.138032	2
brc-1	-0.137866	0
brc-1	-0.136932	0
brc-1	-0.13652	0
brc-1	-0.133393	0
brc-1	-0.133156	0
brc-1	-0.13306	0
brc-1	-0.132687	0
brc-1	-0.132515	0
brc-1	-0.13186	0
brc-1	-0.130927	0
brc-1	-0.130838	0
brc-1	-0.128374	0
brc-1	-0.128026	0
brc-1	-0.125929	0
brc-1	-0.124913	0
brc-1	-0.12482	0
brc-1	-0.124654	1
brc-1	-0.123233	0
brc-1	-0.121796	0
brc-1	-0.121723	0
brc-1	-0.121044	0
brc-1	-0.120174	0
brc-1	-0.118997	0
brc-1	-0.118407	0
brc-1	-0.11723	1
brc-1	-0.116772	0
brc-1	-0.115397	0
brc-1	-0.115031	0
brc-1	-0.114628	0
brc-1	-0.113125	0
brc-1	-0.112967	0
brc-1	-0.112021	0
brc-1	-0.11068	0
brc-1	-0.110342	0
brc-1	-0.109214	0
brc-1	-0.109182	0
brc-1	-0.109028	0
brc-1	-0.105927	0
brc-1	-0.10578	0
brc-1	-0.103916	0
brc-1	-0.103309	0
brc-1	-0.10259	0
brc-1	-0.10235	0
brc-1	-0.101403	0
brc-1	-0.0993514	0
brc-1	-0.099043	0
brc-1	-0.0988237	0
brc-1	-0.0977024	0
brc-1	-0.0973508	0
brc-1	-0.0971214	0
brc-1	-0.0955739	0
brc-1	-0.0955077	0
brc-1	-0.0934258	0
brc-1	-0.0925302	2
brc-1	-0.0919297	0
brc-1	-0.0907521	0
brc-1	-0.0905315	0
brc-1	-0.0903558	0
brc-1	-0.0902272	0
brc-1	-0.0897592	0
brc-1	-0.0877998	0
brc-1	-0.0873656	0
brc-1	-0.0860315	0
brc-1	-0.0859774	0
brc-1	-0.0858032	0
brc-1	-0.0814945	0
brc-1	-0.0811854	0
brc-1	-0.0803615	0
brc-1	-0.0802803	2
brc-1	-0.0795176	0
brc-1	-0.0786719	0
brc-1	-0.0783454	0
brc-1	-0.0782824	0
brc-1	-0.0771243	0
brc-1	-0.0764249	0
brc-1	-0.0763417	0
brc-1	-0.0760094	0
brc-1	-0.0757981	0
brc-1	-0.0756788	0
brc-1	-0.0735037	0
brc-1	-0.0711627	0
brc-1	-0.0710105	0
brc-1	-0.0703077	0
brc-1	-0.0697619	1
brc-1	-0.0697451	0
brc-1	-0.0692537	0
brc-1	-0.0685035	0
brc-1	-0.0681365	0
brc-1	-0.06637	0
brc-1	-0.0642767	0
brc-1	-0.0641199	0
brc-1	-0.0615509	0
brc-1	-0.0611077	0
brc-1	-0.0608324	0
brc-1	-0.060417	0
brc-1	-0.0601883	0
brc-1	-0.0600306	0
brc-1	-0.0558957	0
brc-1	-0.0555732	1
brc-1	-0.0547327	0
brc-1	-0.053959	0
brc-1	-0.0532339	0
brc-1	-0.0528691	0
brc-1	-0.0523267	0
brc-1	-0.0521666	0
brc-1	-0.0520838	0
brc-1	-0.0512336	1
brc-1	-0.0510244	0
brc-1	-0.0508944	0
brc-1	-0.05077	0
brc-1	-0.0490237	0
brc-1	-0.048446	0
brc-1	-0.0466664	0
brc-1	-0.0463596	0
brc-1	-0.0459705	0
brc-1	-0.0445885	0
brc-1	-0.0443845	0
brc-1	-0.0434059	0
brc-1	-0.042502	0
brc-1	-0.0401987	1
brc-1	-0.0398581	0
brc-1	-0.0397767	0
brc-1	-0.0397688	0
brc-1	-0.0385544	1
brc-1	-0.0380351	0
brc-1	-0.0369375	0
brc-1	-0.0365796	0
brc-1	-0.0364077	0
brc-1	-0.035927	2
brc-1	-0.035554	0
brc-1	-0.0353256	0
brc-1	-0.0352275	0
brc-1	-0.0319826	0
brc-1	-0.0318611	0
brc-1	-0.0292454	0
brc-1	-0.0291347	1
brc-1	-0.0278279	0
brc-1	-0.0277131	0
brc-1	-0.0273339	1
brc-1	-0.0265837	1
brc-1	-0.0265364	1
brc-1	-0.024395	0
brc-1	-0.022241	0
brc-1	-0.0214819	0
brc-1	-0.0211727	0
brc-1	-0.020383	0
brc-1	-0.0200003	0
brc-1	-0.019452	2
brc-1	-0.0172883	0
brc-1	-0.015778	0
brc-1	-0.0152594	1
brc-1	-0.0144933	0
brc-1	-0.0142085	0
brc-1	-0.0133704	2
brc-1	-0.0129921	0
brc-1	-0.0125328	1
brc-1	-0.0120666	0
brc-1	-0.0114187	0
brc-1	-0.0099101	0
brc-1	-0.00944255	0
brc-1	-0.0085537	0
brc-1	-0.00676501	0
brc-1	-0.0043317	0
brc-1	-0.00269317	0
brc-1	-0.00241935	0
brc-1	-0.00227601	0
brc-1	-0.000164288	0
brc-1	0	0
brc-1	0	0
brc-1	0	0
brc-1	0.00204332	0
brc-1	0.00265052	0
brc-1	0.00433275	2
brc-1	0.00436799	1
brc-1	0.00505535	0
brc-1	0.00581341	0
brc-1	0.00643149	0
brc-1	0.00939207	0
brc-1	0.00974771	1
brc-1	0.00995309	0
brc-1	0.0109256	2
brc-1	0.0128498	0
brc-1	0.0133696	0
brc-1	0.0143819	0
brc-1	0.0152028	0
brc-1	0.0153664	0
brc-1	0.0184041	0
brc-1	0.0190355	0
brc-1	0.0198892	0
brc-1	0.0224082	1
brc-1	0.0243746	0
brc-1	0.0259078	1
brc-1	0.028079	1
brc-1	0.0288389	2
brc-1	0.029539	1
brc-1	0.0314883	0
brc-1	0.0326204	1
brc-1	0.0360533	0
brc-1	0.0367063	0
brc-1	0.0376745	0
brc-1	0.0387245	3
brc-1	0.0397609	1
brc-1	0.0434867	1
brc-1	0.0444121	2
brc-1	0.0454171	1
brc-1	0.0455525	1
brc-1	0.0458106	1
brc-1	0.0468233	0
brc-1	0.0480515	0
brc-1	0.0496278	3
brc-1	0.0501713	0
brc-1	0.0503569	4
brc-1	0.054409	1
brc-1	0.0546483	0
brc-1	0.0548768	0
brc-1	0.0553896	1
brc-1	0.0558047	0
brc-1	0.0565425	0
brc-1	0.0576303	2
brc-1	0.0595301	0
brc-1	0.062331	0
brc-1	0.0640071	0
brc-1	0.0640806	0
brc-1	0.0643833	0
brc-1	0.0647908	0
brc-1	0.0672738	0
brc-1	0.0677081	0
brc-1	0.067928	0
brc-1	0.0693025	0
brc-1	0.0695414	0
brc-1	0.072071	1
brc-1	0.0729506	0
brc-1	0.0762596	0
brc-1	0.0772284	2
brc-1	0.0779453	3
brc-1	0.0794	1
brc-1	0.0797536	1
brc-1	0.0832479	0
brc-1	0.0851305	0
brc-1	0.0858035	4
brc-1	0.0864505	0
brc-1	0.0875661	0
brc-1	0.0887379	1
brc-1	0.0890978	0
brc-1	0.0898171	0
brc-1	0.0904417	0
brc-1	0.0907659	1
brc-1	0.0914527	0
brc-1	0.0943731	5
brc-1	0.0975139	2
brc-1	0.0976385	0
brc-1	0.100185	1
brc-1	0.101362	0
brc-1	0.10171	0
brc-1	0.102242	1
brc-1	0.104805	1
brc-1	0.106257	3
brc-1	0.106463	0
brc-1	0.107321	7
brc-1	0.109086	0
brc-1	0.112968	0
brc-1	0.113074	4
brc-1	0.113877	0
brc-1	0.116319	0
brc-1	0.117087	4
brc-1	0.119039	1
brc-1	0.119254	0
brc-1	0.119727	0
brc-1	0.124975	6
brc-1	0.125022	1
brc-1	0.125351	1
brc-1	0.125847	2
brc-1	0.127298	4
brc-1	0.127495	0
brc-1	0.129254	3
brc-1	0.13165	3
brc-1	0.131712	0
brc-1	0.132959	0
brc-1	0.133183	0
brc-1	0.133334	7
brc-1	0.134653	1
brc-1	0.13927	2
brc-1	0.139715	0
brc-1	0.142474	0
brc-1	0.143668	0
brc-1	0.144514	4
brc-1	0.145096	0
brc-1	0.145316	0
brc-1	0.146707	0
brc-1	0.146967	1
brc-1	0.149717	0
brc-1	0.150081	4
brc-1	0.151823	0
brc-1	0.153403	0
brc-1	0.153888	0
brc-1	0.154115	0
brc-1	0.157114	0
brc-1	0.160467	0
brc-1	0.160893	0
brc-1	0.164014	6
brc-1	0.164361	0
brc-1	0.166005	0
brc-1	0.166225	5
brc-1	0.166285	2
brc-1	0.166358	0
brc-1	0.16657	0
brc-1	0.167104	0
brc-1	0.168894	6
brc-1	0.170323	0
brc-1	0.172822	0
brc-1	0.172896	0
brc-1	0.174092	3
brc-1	0.175028	5
brc-1	0.176372	0
brc-1	0.179281	0
brc-1	0.180195	0
brc-1	0.182621	0
brc-1	0.182678	3
brc-1	0.182839	0
brc-1	0.18302	0
brc-1	0.184178	0
brc-1	0.184841	4
brc-1	0.186782	2
brc-1	0.186841	6
brc-1	0.186899	0
brc-1	0.187001	3
brc-1	0.187782	0
brc-1	0.189235	1
brc-1	0.190158	0
brc-1	0.190343	3
brc-1	0.190502	0
brc-1	0.190603	0
brc-1	0.192085	0
brc-1	0.192258	3
brc-1	0.192377	3
brc-1	0.194023	2
brc-1	0.194493	1
brc-1	0.195039	3
brc-1	0.196227	6
brc-1	0.198625	3
brc-1	0.200986	5
brc-1	0.202345	2
brc-1	0.204177	0
brc-1	0.204247	0
brc-1	0.205367	6
brc-1	0.205796	3
brc-1	0.20635	0
brc-1	0.208841	1
brc-1	0.209823	0
brc-1	0.210374	7
brc-1	0.212051	0
brc-1	0.212556	0
brc-1	0.212637	0
brc-1	0.215105	7
brc-1	0.216	0
brc-1	0.21739	6
brc-1	0.217603	5
brc-1	0.220049	0
brc-1	0.220729	0
brc-1	0.221302	4
brc-1	0.221336	2
brc-1	0.224794	0
brc-1	0.227316	0
brc-1	0.228315	6
brc-1	0.228315	6
brc-1	0.229293	0
brc-1	0.229459	0
brc-1	0.230029	0
brc-1	0.230528	0
brc-1	0.231016	1
brc-1	0.231035	0
brc-1	0.231185	0
brc-1	0.231605	2
brc-1	0.231903	2
brc-1	0.232139	4
brc-1	0.234146	5
brc-1	0.234776	0
brc-1	0.234888	0
brc-1	0.235606	1
brc-1	0.238016	0
brc-1	0.239582	0
brc-1	0.240933	0
brc-1	0.241375	1
brc-1	0.241525	5
brc-1	0.243391	0
brc-1	0.24399	6
brc-1	0.244688	1
brc-1	0.24723	3
brc-1	0.247363	0
brc-1	0.248255	4
brc-1	0.24852	0
brc-1	0.249173	0
brc-1	0.249181	2
brc-1	0.250289	0
brc-1	0.253091	0
brc-1	0.255154	0
brc-1	0.2552	3
brc-1	0.255988	0
brc-1	0.257351	1
brc-1	0.257872	12
brc-1	0.258498	4
brc-1	0.260194	3
brc-1	0.261556	0
brc-1	0.263163	4
brc-1	0.26446	7
brc-1	0.264521	5
brc-1	0.264531	6
brc-1	0.264865	3
brc-1	0.265326	0
brc-1	0.269718	0
brc-1	0.27234	12
brc-1	0.27366	0
brc-1	0.274081	0
brc-1	0.276144	1
brc-1	0.277044	3
brc-1	0.27778	4
brc-1	0.280453	0
brc-1	0.280665	5
brc-1	0.280944	1
brc-1	0.281505	6
brc-1	0.283521	0
brc-1	0.283731	0
brc-1	0.287588	6
brc-1	0.290311	9
brc-1	0.290358	0
brc-1	0.290452	5
brc-1	0.292019	7
brc-1	0.294271	0
brc-1	0.295361	8
brc-1	0.29593	9
brc-1	0.296112	6
brc-1	0.299166	4
brc-1	0.299496	0
brc-1	0.300949	0
brc-1	0.301882	2
brc-1	0.303046	1
brc-1	0.304438	0
brc-1	0.308524	0
brc-1	0.311398	4
brc-1	0.312999	0
brc-1	0.31441	7
brc-1	0.314717	2
brc-1	0.315448	0
brc-1	0.318721	0
brc-1	0.319558	0
brc-1	0.319888	2
brc-1	0.320916	0
brc-1	0.326096	0
brc-1	0.328088	0
brc-1	0.331015	0
brc-1	0.331849	0
brc-1	0.338209	0
brc-1	0.342036	0
brc-1	0.342774	0
brc-1	0.343252	0
brc-1	0.345983	0
brc-1	0.346296	4
brc-1	0.347962	4
brc-1	0.348369	1
brc-1	0.349284	4
brc-1	0.349837	2
brc-1	0.350696	0
brc-1	0.3516	1
brc-1	0.351875	7
brc-1	0.353238	0
brc-1	0.353556	0
brc-1	0.353584	0
brc-1	0.354563	0
brc-1	0.354664	0
brc-1	0.356387	0
brc-1	0.357296	1
brc-1	0.358087	0
brc-1	0.35929	0
brc-1	0.363204	0
brc-1	0.363971	0
brc-1	0.36542	5
brc-1	0.369107	4
brc-1	0.373256	0
brc-1	0.373314	0
brc-1	0.373406	7
brc-1	0.375615	0
brc-1	0.376568	5
brc-1	0.376925	1
brc-1	0.377573	3
brc-1	0.378668	0
brc-1	0.379439	0
brc-1	0.380264	8
brc-1	0.382042	3
brc-1	0.383316	0
brc-1	0.385935	0
brc-1	0.386385	0
brc-1	0.388051	0
brc-1	0.388315	2
brc-1	0.38921	0
brc-1	0.38934	0
brc-1	0.391919	0
brc-1	0.393658	2
brc-1	0.394083	0
brc-1	0.396607	0
brc-1	0.398572	0
brc-1	0.399975	3
brc-1	0.400872	0
brc-1	0.401844	0
brc-1	0.403505	11
brc-1	0.404068	0
brc-1	0.404854	1
brc-1	0.405159	0
brc-1	0.405304	0
brc-1	0.406263	0
brc-1	0.408676	6
brc-1	0.409275	4
brc-1	0.410373	3
brc-1	0.410398	0
brc-1	0.413374	0
brc-1	0.414792	4
brc-1	0.416697	2
brc-1	0.417663	0
brc-1	0.41845	0
brc-1	0.418561	0
brc-1	0.41915	14
brc-1	0.419209	0
brc-1	0.421528	3
brc-1	0.422097	0
brc-1	0.422698	8
brc-1	0.425104	3
brc-1	0.426415	0
brc-1	0.426949	0
brc-1	0.42792	0
brc-1	0.430416	0
brc-1	0.430596	0
brc-1	0.431671	0
brc-1	0.431766	0
brc-1	0.432503	0
brc-1	0.433815	6
brc-1	0.434044	0
brc-1	0.434445	0
brc-1	0.435888	0
brc-1	0.436119	2
brc-1	0.438065	0
brc-1	0.439315	1
brc-1	0.440069	0
brc-1	0.440921	1
brc-1	0.442568	0
brc-1	0.444246	4
brc-1	0.444968	0
brc-1	0.445655	4
brc-1	0.449758	0
brc-1	0.45016	2
brc-1	0.450518	7
brc-1	0.450594	0
brc-1	0.452199	0
brc-1	0.452597	0
brc-1	0.452701	0
brc-1	0.452954	1
brc-1	0.453099	0
brc-1	0.453633	1
brc-1	0.453697	5
brc-1	0.454607	0
brc-1	0.456062	0
brc-1	0.456274	3
brc-1	0.456332	0
brc-1	0.456659	1
brc-1	0.461213	0
brc-1	0.46201	2
brc-1	0.462138	1
brc-1	0.462693	0
brc-1	0.464036	4
brc-1	0.467016	0
brc-1	0.467408	4
brc-1	0.467409	1
brc-1	0.46948	0
brc-1	0.470228	3
brc-1	0.470749	5
brc-1	0.471629	3
brc-1	0.472847	3
brc-1	0.474617	0
brc-1	0.476586	0
brc-1	0.476734	0
brc-1	0.478958	0
brc-1	0.481138	1
brc-1	0.482259	0
brc-1	0.48514	0
brc-1	0.485299	1
brc-1	0.485885	3
brc-1	0.487242	1
brc-1	0.490208	1
brc-1	0.490914	0
brc-1	0.49126	0
brc-1	0.491347	0
brc-1	0.494334	0
brc-1	0.495378	0
brc-1	0.498789	1
brc-1	0.499523	2
brc-1	0.500051	0
brc-1	0.503521	0
brc-1	0.503828	0
brc-1	0.505429	1
brc-1	0.506913	0
brc-1	0.506994	0
brc-1	0.507914	2
brc-1	0.509449	0
brc-1	0.510336	0
brc-1	0.512293	1
brc-1	0.513253	0
brc-1	0.513418	2
brc-1	0.516211	2
brc-1	0.516334	1
brc-1	0.516734	5
brc-1	0.519223	0
brc-1	0.519814	7
brc-1	0.520845	0
brc-1	0.521965	0
brc-1	0.523178	0
brc-1	0.52353	0
brc-1	0.524373	0
brc-1	0.524461	2
brc-1	0.52619	0
brc-1	0.527336	0
brc-1	0.527479	0
brc-1	0.52762	0
brc-1	0.529983	0
brc-1	0.530325	0
brc-1	0.530356	0
brc-1	0.533717	0
brc-1	0.53546	2
brc-1	0.536442	0
brc-1	0.538275	0
brc-1	0.538398	0
brc-1	0.538971	0
brc-1	0.539738	0
brc-1	0.540096	0
brc-1	0.540568	0
brc-1	0.540797	0
brc-1	0.541705	1
brc-1	0.54313	0
brc-1	0.543526	1
brc-1	0.543583	2
brc-1	0.54434	2
brc-1	0.544713	0
brc-1	0.548202	0
brc-1	0.548725	0
brc-1	0.550775	1
brc-1	0.554072	3
brc-1	0.555717	0
brc-1	0.555984	0
brc-1	0.556231	0
brc-1	0.557831	3
brc-1	0.558153	0
brc-1	0.558858	1
brc-1	0.558888	0
brc-1	0.562779	0
brc-1	0.562865	0
brc-1	0.563139	1
brc-1	0.563903	0
brc-1	0.564148	0
brc-1	0.565457	0
brc-1	0.565601	0
brc-1	0.565614	0
brc-1	0.565833	0
brc-1	0.566237	0
brc-1	0.567075	0
brc-1	0.567475	1
brc-1	0.567988	3
brc-1	0.568048	0
brc-1	0.570221	0
brc-1	0.571989	0
brc-1	0.572582	0
brc-1	0.572752	0
brc-1	0.575567	1
brc-1	0.581313	0
brc-1	0.581336	0
brc-1	0.582721	0
brc-1	0.587283	1
brc-1	0.588972	4
brc-1	0.588994	2
brc-1	0.589855	0
brc-1	0.59263	0
brc-1	0.59419	1
brc-1	0.594204	0
brc-1	0.594309	2
brc-1	0.594676	0
brc-1	0.595535	1
brc-1	0.595669	0
brc-1	0.59626	0
brc-1	0.597333	0
brc-1	0.598556	0
brc-1	0.59941	0
brc-1	0.600041	0
brc-1	0.600514	1
brc-1	0.600719	0
brc-1	0.601156	2
brc-1	0.603165	0
brc-1	0.604702	7
brc-1	0.605581	3
brc-1	0.606787	0
brc-1	0.607528	0
brc-1	0.60858	0
brc-1	0.609854	0
brc-1	0.611855	0
brc-1	0.612859	0
brc-1	0.613838	0
brc-1	0.615083	2
brc-1	0.616286	0
brc-1	0.618053	0
brc-1	0.618553	0
brc-1	0.619035	3
brc-1	0.620927	0
brc-1	0.622536	3
brc-1	0.6233	1
brc-1	0.624478	0
brc-1	0.624532	5
brc-1	0.627779	0
brc-1	0.628118	2
brc-1	0.628154	1
brc-1	0.629338	0
brc-1	0.629648	0
brc-1	0.632109	0
brc-1	0.632181	2
brc-1	0.633252	2
brc-1	0.633659	1
brc-1	0.634617	0
brc-1	0.636994	0
brc-1	0.639215	0
brc-1	0.639702	0
brc-1	0.639779	0
brc-1	0.642763	0
brc-1	0.643601	1
brc-1	0.643693	0
brc-1	0.644227	0
brc-1	0.645047	0
brc-1	0.646346	0
brc-1	0.646447	6
brc-1	0.647233	0
brc-1	0.647909	0
brc-1	0.650602	1
brc-1	0.651917	0
brc-1	0.65351	0
brc-1	0.653642	0
brc-1	0.656393	0
brc-1	0.656659	1
brc-1	0.658661	0
brc-1	0.659121	0
brc-1	0.659353	0
brc-1	0.659482	1
brc-1	0.660644	0
brc-1	0.661382	1
brc-1	0.661859	0
brc-1	0.663082	1
brc-1	0.665537	5
brc-1	0.666824	0
brc-1	0.668329	0
brc-1	0.671664	1
brc-1	0.671795	2
brc-1	0.672275	6
brc-1	0.672313	0
brc-1	0.672605	0
brc-1	0.673485	0
brc-1	0.673495	1
brc-1	0.674348	0
brc-1	0.676363	0
brc-1	0.676745	0
brc-1	0.679494	2
brc-1	0.679698	1
brc-1	0.680695	0
brc-1	0.681273	0
brc-1	0.684021	0
brc-1	0.685897	0
brc-1	0.686144	0
brc-1	0.68879	0
brc-1	0.689576	0
brc-1	0.692334	0
brc-1	0.695632	0
brc-1	0.696151	2
brc-1	0.696227	0
brc-1	0.697601	0
brc-1	0.699764	5
brc-1	0.700764	0
brc-1	0.701336	0
brc-1	0.701763	1
brc-1	0.702886	0
brc-1	0.704284	0
brc-1	0.704864	0
brc-1	0.706864	2
brc-1	0.709786	0
brc-1	0.709875	0
brc-1	0.709892	1
brc-1	0.712103	0
brc-1	0.712657	5
brc-1	0.712861	1
brc-1	0.713432	0
brc-1	0.71431	0
brc-1	0.714977	1
brc-1	0.715225	0
brc-1	0.717108	0
brc-1	0.720217	2
brc-1	0.723099	0
brc-1	0.723151	0
brc-1	0.725474	0
brc-1	0.727922	0
brc-1	0.730163	0
brc-1	0.732547	0
brc-1	0.733332	0
brc-1	0.733569	0
brc-1	0.735821	2
brc-1	0.738158	0
brc-1	0.739387	0
brc-1	0.740117	0
brc-1	0.740858	0
brc-1	0.742666	0
brc-1	0.747014	0
brc-1	0.747692	1
brc-1	0.748115	2
brc-1	0.751921	0
brc-1	0.75294	0
brc-1	0.754812	0
brc-1	0.754994	0
brc-1	0.755175	0
brc-1	0.755505	1
brc-1	0.759424	0
brc-1	0.760029	0
brc-1	0.760515	0
brc-1	0.762397	0
brc-1	0.762789	0
brc-1	0.763656	4
brc-1	0.765251	0
brc-1	0.766671	1
brc-1	0.771752	0
brc-1	0.774987	1
brc-1	0.77549	0
brc-1	0.778623	0
brc-1	0.779321	0
brc-1	0.77946	0
brc-1	0.779538	3
brc-1	0.784739	0
brc-1	0.786989	0
brc-1	0.7899	1
brc-1	0.791502	0
brc-1	0.792209	0
brc-1	0.792606	1
brc-1	0.79326	1
brc-1	0.795726	2
brc-1	0.795819	0
brc-1	0.796303	0
brc-1	0.796767	0
brc-1	0.79722	1
brc-1	0.79828	0
brc-1	0.802197	0
brc-1	0.802325	3
brc-1	0.803089	0
brc-1	0.803374	0
brc-1	0.803474	0
brc-1	0.8056	0
brc-1	0.809089	6
brc-1	0.813441	0
brc-1	0.813766	0
brc-1	0.815814	0
brc-1	0.817834	2
brc-1	0.818124	4
brc-1	0.820502	0
brc-1	0.822037	2
brc-1	0.822094	0
brc-1	0.822889	1
brc-1	0.824034	0
brc-1	0.824679	0
brc-1	0.826691	1
brc-1	0.829342	0
brc-1	0.831227	1
brc-1	0.832214	0
brc-1	0.83375	0
brc-1	0.83382	1
brc-1	0.834766	0
brc-1	0.835651	0
brc-1	0.836977	0
brc-1	0.837923	0
brc-1	0.838132	0
brc-1	0.838238	0
brc-1	0.843612	2
brc-1	0.844469	1
brc-1	0.846087	0
brc-1	0.847257	3
brc-1	0.849707	1
brc-1	0.850003	1
brc-1	0.850305	0
brc-1	0.856717	0
brc-1	0.857851	0
brc-1	0.859715	1
brc-1	0.860581	1
brc-1	0.862017	0
brc-1	0.862946	1
brc-1	0.864074	1
brc-1	0.864878	0
brc-1	0.86717	0
brc-1	0.869221	1
brc-1	0.870043	0
brc-1	0.870255	0
brc-1	0.871745	4
brc-1	0.873444	0
brc-1	0.882301	2
brc-1	0.8836	0
brc-1	0.884367	0
brc-1	0.884921	0
brc-1	0.886566	0
brc-1	0.886786	0
brc-1	0.891053	0
brc-1	0.891269	0
brc-1	0.891364	0
brc-1	0.893446	0
brc-1	0.893499	0
brc-1	0.894299	0
brc-1	0.894946	0
brc-1	0.905523	2
brc-1	0.905829	0
brc-1	0.906725	1
brc-1	0.907466	0
brc-1	0.908088	0
brc-1	0.908211	0
brc-1	0.910287	0
brc-1	0.91175	0
brc-1	0.916111	0
brc-1	0.916268	0
brc-1	0.91641	0
brc-1	0.917236	1
brc-1	0.917576	0
brc-1	0.921026	2
brc-1	0.921141	0
brc-1	0.922829	0
brc-1	0.928222	0
brc-1	0.930303	0
brc-1	0.933074	1
brc-1	0.934757	0
brc-1	0.936009	0
brc-1	0.936578	1
brc-1	0.93799	4
brc-1	0.939169	0
brc-1	0.941043	0
brc-1	0.941101	0
brc-1	0.941422	1
brc-1	0.941881	0
brc-1	0.941942	1
brc-1	0.944666	0
brc-1	0.947133	0
brc-1	0.948889	0
brc-1	0.953769	0
brc-1	0.954557	0
brc-1	0.955309	0
brc-1	0.955514	0
brc-1	0.956949	0
brc-1	0.958456	0
brc-1	0.958876	1
brc-1	0.965194	0
brc-1	0.965901	0
brc-1	0.970201	1
brc-1	0.970542	0
brc-1	0.972776	0
brc-1	0.973919	4
brc-1	0.975131	1
brc-1	0.976295	0
brc-1	0.978221	0
brc-1	0.978385	0
brc-1	0.978403	0
brc-1	0.981644	0
brc-1	0.986721	0
brc-1	0.9918	0
brc-1	0.992086	1
brc-1	0.995057	0
brc-1	0.995602	0
brc-1	0.995702	0
brc-1	1.00561	0
brc-1	1.0072	0
brc-1	1.01266	0
brc-1	1.0134	0
brc-1	1.01701	1
brc-1	1.01844	0
brc-1	1.03145	0
brc-1	1.0336	3
brc-1	1.04585	0
brc-1	1.04936	1
brc-1	1.05219	1
brc-1	1.05449	1
brc-1	1.07481	0
brc-1	1.07595	0
brc-1	1.07785	0
brc-1	1.08887	1
brc-1	1.30569	0
N2	-0.377772	0
N2	-0.367094	0
N2	-0.347436	0
N2	-0.347424	0
N2	-0.322977	0
N2	-0.31781	0
N2	-0.316772	0
N2	-0.303548	0
N2	-0.298796	0
N2	-0.290209	0
N2	-0.285702	0
N2	-0.282802	0
N2	-0.282302	0
N2	-0.28136	0
N2	-0.280075	0
N2	-0.279229	1
N2	-0.278969	0
N2	-0.275862	0
N2	-0.274261	2
N2	-0.270796	0
N2	-0.270287	0
N2	-0.267301	0
N2	-0.263036	0
N2	-0.260478	0
N2	-0.25982	0
N2	-0.259393	0
N2	-0.258176	0
N2	-0.258003	0
N2	-0.255455	0
N2	-0.254265	0
N2	-0.251215	0
N2	-0.250658	0
N2	-0.247974	0
N2	-0.246539	0
N2	-0.245515	0
N2	-0.243251	0
N2	-0.242586	0
N2	-0.242134	0
N2	-0.241041	0
N2	-0.239462	0
N2	-0.236668	0
N2	-0.23493	0
N2	-0.234483	0
N2	-0.234199	0
N2	-0.23318	0
N2	-0.232076	0
N2	-0.231861	0
N2	-0.22895	0
N2	-0.228369	0
N2	-0.227775	0
N2	-0.226623	0
N2	-0.225707	0
N2	-0.224824	0
N2	-0.223798	0
N2	-0.22353	1
N2	-0.222093	0
N2	-0.22087	0
N2	-0.21639	0
N2	-0.215612	0
N2	-0.215472	0
N2	-0.215334	1
N2	-0.212195	0
N2	-0.211608	0
N2	-0.211324	0
N2	-0.210185	0
N2	-0.209933	0
N2	-0.209273	0
N2	-0.209144	0
N2	-0.208714	0
N2	-0.208696	0
N2	-0.208054	0
N2	-0.20718	0
N2	-0.205648	0
N2	-0.201997	0
N2	-0.201224	0
N2	-0.200561	0
N2	-0.196738	0
N2	-0.192962	0
N2	-0.192112	1
N2	-0.190787	0
N2	-0.18844	0
N2	-0.187711	0
N2	-0.18692	0
N2	-0.186739	0
N2	-0.185931	0
N2	-0.185789	0
N2	-0.1856	0
N2	-0.184974	0
N2	-0.182864	0
N2	-0.180087	2
N2	-0.178332	1
N2	-0.1779	0
N2	-0.176235	0
N2	-0.175763	0
N2	-0.174681	0
N2	-0.172886	0
N2	-0.172602	1
N2	-0.171789	0
N2	-0.168925	1
N2	-0.166069	0
N2	-0.165543	0
N2	-0.165009	0
N2	-0.164223	0
N2	-0.164206	0
N2	-0.163608	0
N2	-0.161593	0
N2	-0.161585	0
N2	-0.160518	0
N2	-0.159428	0
N2	-0.158934	0
N2	-0.156933	0
N2	-0.156798	0
N2	-0.156769	0
N2	-0.154929	0
N2	-0.153915	0
N2	-0.153812	0
N2	-0.151752	0
N2	-0.150088	1
N2	-0.148722	0
N2	-0.147929	0
N2	-0.147739	0
N2	-0.14728	0
N2	-0.147205	0
N2	-0.147142	0
N2	-0.146799	0
N2	-0.144025	0
N2	-0.143692	0
N2	-0.143188	0
N2	-0.142903	0
N2	-0.142067	0
N2	-0.141036	0
N2	-0.13972	0
N2	-0.138372	0
N2	-0.137801	0
N2	-0.137008	0
N2	-0.134588	0
N2	-0.134011	0
N2	-0.133656	0
N2	-0.133601	1
N2	-0.133463	0
N2	-0.133146	0
N2	-0.131866	0
N2	-0.126514	0
N2	-0.125553	0
N2	-0.125284	0
N2	-0.125146	0
N2	-0.123179	0
N2	-0.122928	0
N2	-0.120665	0
N2	-0.120128	0
N2	-0.119436	0
N2	-0.118766	0
N2	-0.118588	0
N2	-0.118559	0
N2	-0.118259	0
N2	-0.117635	0
N2	-0.11723	0
N2	-0.116974	0
N2	-0.116926	4
N2	-0.115324	0
N2	-0.113742	0
N2	-0.113233	0
N2	-0.112711	0
N2	-0.111254	0
N2	-0.110865	0
N2	-0.109121	0
N2	-0.108833	0
N2	-0.108626	1
N2	-0.108547	0
N2	-0.106183	0
N2	-0.105209	0
N2	-0.104813	0
N2	-0.102819	2
N2	-0.102161	0
N2	-0.100949	0
N2	-0.100808	0
N2	-0.100684	0
N2	-0.0981278	0
N2	-0.0980988	0
N2	-0.0970453	0
N2	-0.0962127	0
N2	-0.0957469	1
N2	-0.0952888	0
N2	-0.0950961	0
N2	-0.0942144	0
N2	-0.0938638	0
N2	-0.0910608	0
N2	-0.0910265	0
N2	-0.0909385	1
N2	-0.0906174	0
N2	-0.0905504	0
N2	-0.089752	0
N2	-0.0890461	0
N2	-0.0866333	0
N2	-0.0860169	2
N2	-0.0834067	0
N2	-0.0826017	0
N2	-0.0822519	0
N2	-0.0806844	0
N2	-0.0799157	1
N2	-0.0786506	1
N2	-0.0778674	0
N2	-0.077765	0
N2	-0.0774041	0
N2	-0.075443	0
N2	-0.0735327	0
N2	-0.0709867	0
N2	-0.0703112	0
N2	-0.0663504	0
N2	-0.0662275	0
N2	-0.0660968	0
N2	-0.0651173	1
N2	-0.0650555	0
N2	-0.0631025	0
N2	-0.0622598	0
N2	-0.0620373	0
N2	-0.0611322	0
N2	-0.0610533	0
N2	-0.0597345	0
N2	-0.0579196	0
N2	-0.0576075	0
N2	-0.0558937	0
N2	-0.055873	0
N2	-0.0558231	0
N2	-0.0552245	0
N2	-0.0531171	0
N2	-0.0514485	1
N2	-0.0513934	1
N2	-0.0509984	0
N2	-0.0505965	0
N2	-0.050546	0
N2	-0.0487462	0
N2	-0.0482457	1
N2	-0.0474839	0
N2	-0.0472738	1
N2	-0.0465775	0
N2	-0.0463804	0
N2	-0.0441808	0
N2	-0.0427079	1
N2	-0.0420764	0
N2	-0.0407547	0
N2	-0.040624	1
N2	-0.0400572	0
N2	-0.0380925	0
N2	-0.0367893	0
N2	-0.0360896	1
N2	-0.0356411	0
N2	-0.0343359	0
N2	-0.0336582	0
N2	-0.0320529	0
N2	-0.0315524	0
N2	-0.0302677	0
N2	-0.0282736	0
N2	-0.0279033	0
N2	-0.027537	1
N2	-0.0270364	1
N2	-0.0254231	0
N2	-0.0249083	0
N2	-0.0221688	0
N2	-0.0215158	0
N2	-0.020875	2
N2	-0.019117	0
N2	-0.0182024	1
N2	-0.0171528	0
N2	-0.0162301	0
N2	-0.0160507	0
N2	-0.0155239	0
N2	-0.0154688	0
N2	-0.0144737	0
N2	-0.0138549	1
N2	-0.0121171	0
N2	-0.009852	0
N2	-0.00971168	0
N2	-0.00703749	0
N2	-0.00695839	0
N2	-0.0057977	0
N2	-0.00157238	0
N2	0.0040986	0
N2	0.00568787	1
N2	0.00819385	0
N2	0.0101934	1
N2	0.013387	2
N2	0.0141824	0
N2	0.0161989	0
N2	0.0180381	0
N2	0.0188548	0
N2	0.0193209	0
N2	0.0201243	2
N2	0.0207238	5
N2	0.0276252	0
N2	0.0288536	3
N2	0.0294217	0
N2	0.0303212	1
N2	0.0310309	0
N2	0.0348095	1
N2	0.0355033	1
N2	0.0358089	0
N2	0.035999	0
N2	0.0421877	0
N2	0.0432301	0
N2	0.0448942	0
N2	0.0448987	0
N2	0.0452546	0
N2	0.0455026	0
N2	0.0459026	1
N2	0.0460017	1
N2	0.0556108	3
N2	0.0578974	0
N2	0.0592797	2
N2	0.0601854	0
N2	0.061664	0
N2	0.0618105	1
N2	0.0632426	2
N2	0.0635411	0
N2	0.0637198	4
N2	0.0648717	3
N2	0.0656642	0
N2	0.0667303	0
N2	0.0674553	1
N2	0.0705591	2
N2	0.0717158	2
N2	0.0746711	1
N2	0.075041	0
N2	0.0784488	2
N2	0.082248	0
N2	0.0850802	4
N2	0.0854181	1
N2	0.0865426	2
N2	0.0880866	0
N2	0.0933993	1
N2	0.0939394	0
N2	0.0949379	4
N2	0.0989317	3
N2	0.100889	0
N2	0.102575	2
N2	0.103326	4
N2	0.103724	0
N2	0.104288	0
N2	0.10854	5
N2	0.109725	0
N2	0.109782	1
N2	0.109987	2
N2	0.110184	7
N2	0.111539	2
N2	0.113768	4
N2	0.114741	0
N2	0.117422	0
N2	0.117533	10
N2	0.122334	0
N2	0.123134	4
N2	0.123643	0
N2	0.123843	7
N2	0.125872	3
N2	0.128693	0
N2	0.130034	6
N2	0.130053	1
N2	0.132158	5
N2	0.133388	7
N2	0.134047	0
N2	0.136168	6
N2	0.136489	2
N2	0.136585	0
N2	0.138021	8
N2	0.140954	1
N2	0.141584	5
N2	0.141968	0
N2	0.142506	4
N2	0.143244	3
N2	0.145413	5
N2	0.145529	7
N2	0.146833	4
N2	0.147259	0
N2	0.147658	2
N2	0.149782	0
N2	0.149848	3
N2	0.149891	0
N2	0.150856	4
N2	0.151041	8
N2	0.15246	1
N2	0.152525	7
N2	0.155127	2
N2	0.157736	4
N2	0.157894	8
N2	0.157914	7
N2	0.158491	0
N2	0.162418	3
N2	0.162489	3
N2	0.163853	2
N2	0.167738	0
N2	0.171637	2
N2	0.173852	5
N2	0.177418	0
N2	0.177565	14
N2	0.177833	0
N2	0.178383	5
N2	0.178909	5
N2	0.180492	3
N2	0.181804	0
N2	0.182603	11
N2	0.182717	8
N2	0.18375	3
N2	0.186572	1
N2	0.186579	0
N2	0.187465	1
N2	0.189699	0
N2	0.190669	1
N2	0.191731	4
N2	0.192109	0
N2	0.192202	0
N2	0.192251	0
N2	0.194658	0
N2	0.198287	5
N2	0.198397	2
N2	0.198913	2
N2	0.20021	6
N2	0.206653	2
N2	0.206819	8
N2	0.209121	3
N2	0.213155	5
N2	0.213216	1
N2	0.213942	4
N2	0.214046	0
N2	0.214597	0
N2	0.21678	4
N2	0.217329	6
N2	0.218581	7
N2	0.220358	3
N2	0.220977	7
N2	0.226188	5
N2	0.227086	9
N2	0.229233	6
N2	0.230672	4
N2	0.231374	3
N2	0.233917	0
N2	0.234753	0
N2	0.235856	4
N2	0.237334	3
N2	0.237466	4
N2	0.237548	0
N2	0.237904	5
N2	0.240189	6
N2	0.240342	8
N2	0.240654	4
N2	0.242501	4
N2	0.243638	0
N2	0.246256	5
N2	0.246942	8
N2	0.246995	0
N2	0.247726	0
N2	0.251853	0
N2	0.252365	0
N2	0.252673	11
N2	0.255264	9
N2	0.255462	0
N2	0.256236	8
N2	0.26002	0
N2	0.260741	4
N2	0.263031	0
N2	0.263981	4
N2	0.265972	0
N2	0.266073	10
N2	0.266443	5
N2	0.268533	4
N2	0.269728	0
N2	0.272109	2
N2	0.273931	6
N2	0.273963	0
N2	0.274442	10
N2	0.275343	3
N2	0.275673	4
N2	0.27884	4
N2	0.280403	5
N2	0.280487	7
N2	0.280918	6
N2	0.281124	0
N2	0.283666	4
N2	0.28374	3
N2	0.284449	7
N2	0.284696	0
N2	0.285166	4
N2	0.285637	2
N2	0.285872	0
N2	0.286004	6
N2	0.286119	10
N2	0.287734	0
N2	0.289267	5
N2	0.289872	4
N2	0.29338	0
N2	0.296399	4
N2	0.297155	12
N2	0.302221	0
N2	0.303171	0
N2	0.30361	4
N2	0.305971	8
N2	0.306444	2
N2	0.308487	0
N2	0.31153	0
N2	0.312686	2
N2	0.314554	0
N2	0.315972	0
N2	0.317645	4
N2	0.320221	4
N2	0.32053	0
N2	0.322839	4
N2	0.326128	3
N2	0.32706	1
N2	0.32769	8
N2	0.330644	0
N2	0.333152	9
N2	0.333949	0
N2	0.336038	4
N2	0.336358	4
N2	0.337314	0
N2	0.338263	7
N2	0.340015	7
N2	0.340134	0
N2	0.342364	3
N2	0.34473	3
N2	0.349087	4
N2	0.349415	7
N2	0.35038	6
N2	0.352065	4
N2	0.354286	3
N2	0.358814	0
N2	0.359872	8
N2	0.360798	8
N2	0.362927	4
N2	0.363342	5
N2	0.369894	1
N2	0.370892	4
N2	0.37187	7
N2	0.37203	2
N2	0.375079	5
N2	0.375384	3
N2	0.378052	5
N2	0.379045	0
N2	0.379059	0
N2	0.379924	7
N2	0.383494	6
N2	0.383677	2
N2	0.384485	0
N2	0.384672	6
N2	0.388882	8
N2	0.391032	0
N2	0.391388	0
N2	0.393746	11
N2	0.394049	6
N2	0.395885	6
N2	0.397814	0
N2	0.402169	5
N2	0.403527	0
N2	0.403859	4
N2	0.404101	11
N2	0.404813	0
N2	0.405432	0
N2	0.408651	3
N2	0.408954	0
N2	0.409902	14
N2	0.411236	0
N2	0.411587	6
N2	0.412682	6
N2	0.417097	0
N2	0.417206	0
N2	0.417876	2
N2	0.417912	0
N2	0.421118	0
N2	0.422551	3
N2	0.422981	0
N2	0.42713	0
N2	0.43061	0
N2	0.433	1
N2	0.435755	0
N2	0.437416	7
N2	0.437555	6
N2	0.438804	9
N2	0.44021	0
N2	0.440656	6
N2	0.440925	3
N2	0.443623	0
N2	0.44466	1
N2	0.44812	8
N2	0.454337	14
N2	0.45539	5
N2	0.45577	2
N2	0.462816	7
N2	0.467577	5
N2	0.471033	0
N2	0.471221	0
N2	0.471689	3
N2	0.471907	11
N2	0.472358	10
N2	0.472724	0
N2	0.47406	6
N2	0.474085	2
N2	0.47457	6
N2	0.475409	5
N2	0.475721	4
N2	0.47723	6
N2	0.477722	4
N2	0.477901	0
N2	0.480204	3
N2	0.482586	0
N2	0.486717	5
N2	0.489444	2
N2	0.4896	2
N2	0.49016	0
N2	0.491873	8
N2	0.495313	2
N2	0.499274	6
N2	0.500637	0
N2	0.50123	0
N2	0.502077	0
N2	0.508951	3
N2	0.512262	0
N2	0.515221	7
N2	0.518309	0
N2	0.519417	1
N2	0.522714	2
N2	0.524627	1
N2	0.527954	5
N2	0.530264	0
N2	0.531437	2
N2	0.532351	4
N2	0.532674	3
N2	0.532944	0
N2	0.533132	0
N2	0.533584	3
N2	0.533932	0
N2	0.534966	7
N2	0.536688	2
N2	0.541569	1
N2	0.544861	9
N2	0.54648	5
N2	0.547304	4
N2	0.55047	0
N2	0.554368	0
N2	0.555901	1
N2	0.55707	0
N2	0.558437	0
N2	0.559168	3
N2	0.559689	3
N2	0.562211	0
N2	0.563165	2
N2	0.563944	3
N2	0.564511	7
N2	0.566712	0
N2	0.567058	1
N2	0.567711	0
N2	0.573021	2
N2	0.573704	0
N2	0.576201	4
N2	0.576417	4
N2	0.576682	1
N2	0.577036	7
N2	0.579471	2
N2	0.582024	0
N2	0.582042	0
N2	0.582741	3
N2	0.584562	0
N2	0.585326	3
N2	0.587776	1
N2	0.590018	0
N2	0.592794	0
N2	0.5934	3
N2	0.59349	3
N2	0.594486	1
N2	0.594947	0
N2	0.59561	8
N2	0.59796	0
N2	0.599821	1
N2	0.600561	0
N2	0.601854	3
N2	0.603721	0
N2	0.605387	0
N2	0.608227	0
N2	0.610866	2
N2	0.611335	1
N2	0.612183	0
N2	0.612196	4
N2	0.614161	0
N2	0.615707	0
N2	0.615723	6
N2	0.618002	0
N2	0.62044	3
N2	0.621702	1
N2	0.62443	0
N2	0.627603	10
N2	0.628516	0
N2	0.631581	2
N2	0.631752	7
N2	0.631774	1
N2	0.63619	0
N2	0.636286	2
N2	0.636565	0
N2	0.639286	0
N2	0.641131	2
N2	0.647185	0
N2	0.648659	0
N2	0.648846	0
N2	0.651692	4
N2	0.65226	1
N2	0.652529	0
N2	0.653847	1
N2	0.656463	0
N2	0.657211	0
N2	0.659784	4
N2	0.662068	0
N2	0.662078	4
N2	0.662279	5
N2	0.663047	0
N2	0.664574	2
N2	0.665615	0
N2	0.665846	3
N2	0.666886	0
N2	0.667218	2
N2	0.66899	0
N2	0.669428	0
N2	0.673279	0
N2	0.683255	0
N2	0.686638	0
N2	0.688777	3
N2	0.688781	0
N2	0.689258	5
N2	0.690452	0
N2	0.693823	1
N2	0.694016	2
N2	0.69459	0
N2	0.694899	0
N2	0.697769	0
N2	0.698024	1
N2	0.698899	0
N2	0.699051	1
N2	0.699563	1
N2	0.701306	0
N2	0.705331	0
N2	0.707243	0
N2	0.712439	2
N2	0.714941	0
N2	0.718962	0
N2	0.721351	0
N2	0.722832	1
N2	0.725379	1
N2	0.725555	2
N2	0.728985	3
N2	0.729623	0
N2	0.731954	3
N2	0.732701	1
N2	0.733589	2
N2	0.735767	2
N2	0.73884	1
N2	0.740219	1
N2	0.740248	0
N2	0.740261	2
N2	0.740889	1
N2	0.744282	0
N2	0.745856	0
N2	0.749141	1
N2	0.751493	0
N2	0.751866	0
N2	0.751947	0
N2	0.752542	1
N2	0.756837	0
N2	0.758344	0
N2	0.761677	0
N2	0.762861	0
N2	0.767664	2
N2	0.77157	0
N2	0.772401	2
N2	0.772914	1
N2	0.776389	0
N2	0.780214	0
N2	0.780224	3
N2	0.781524	0
N2	0.782686	0
N2	0.783116	0
N2	0.785615	0
N2	0.787123	1
N2	0.78783	1
N2	0.788819	0
N2	0.79014	0
N2	0.791003	0
N2	0.791871	0
N2	0.793456	0
N2	0.796972	2
N2	0.803785	3
N2	0.804785	0
N2	0.806759	0
N2	0.807726	0
N2	0.809067	0
N2	0.812382	0
N2	0.814595	1
N2	0.814615	3
N2	0.817318	0
N2	0.819349	0
N2	0.819972	0
N2	0.823527	1
N2	0.823736	0
N2	0.823805	0
N2	0.824818	1
N2	0.826576	0
N2	0.830305	0
N2	0.833158	0
N2	0.833729	1
N2	0.834216	1
N2	0.834501	2
N2	0.834571	0
N2	0.836641	0
N2	0.841681	0
N2	0.843564	2
N2	0.845623	0
N2	0.84888	0
N2	0.849309	1
N2	0.849876	0
N2	0.850269	0
N2	0.851901	0
N2	0.855588	0
N2	0.856202	0
N2	0.857786	0
N2	0.859391	0
N2	0.861366	0
N2	0.86287	3
N2	0.863562	0
N2	0.863671	0
N2	0.865053	1
N2	0.866112	0
N2	0.867018	0
N2	0.872108	0
N2	0.872613	1
N2	0.87268	1
N2	0.872962	0
N2	0.873498	1
N2	0.876455	0
N2	0.880299	0
N2	0.885833	0
N2	0.888454	1
N2	0.890067	0
N2	0.890884	3
N2	0.892184	0
N2	0.894546	2
N2	0.894889	1
N2	0.896898	0
N2	0.900604	0
N2	0.900626	0
N2	0.902257	0
N2	0.902399	0
N2	0.903236	0
N2	0.905176	0
N2	0.908527	1
N2	0.909109	0
N2	0.910718	0
N2	0.913983	1
N2	0.914075	0
N2	0.916886	0
N2	0.921498	0
N2	0.923401	1
N2	0.923574	0
N2	0.926477	1
N2	0.927232	5
N2	0.933215	1
N2	0.933766	0
N2	0.934532	0
N2	0.934687	0
N2	0.93622	0
N2	0.939843	0
N2	0.94042	0
N2	0.942154	1
N2	0.946144	0
N2	0.951654	1
N2	0.953276	0
N2	0.954753	0
N2	0.964111	5
N2	0.972243	0
N2	0.973729	0
N2	0.974612	0
N2	0.976005	3
N2	0.977578	3
N2	0.986031	0
N2	0.992724	0
N2	0.994612	1
N2	1.0425	0
smc-5	-0.381316	11
smc-5	-0.340313	3
smc-5	-0.334558	1
smc-5	-0.327518	0
smc-5	-0.316784	2
smc-5	-0.313922	3
smc-5	-0.310952	0
smc-5	-0.309439	0
smc-5	-0.308334	1
smc-5	-0.308061	2
smc-5	-0.30717	0
smc-5	-0.30298	1
smc-5	-0.296891	1
smc-5	-0.294246	13
smc-5	-0.293104	0
smc-5	-0.291888	0
smc-5	-0.291423	0
smc-5	-0.286122	0
smc-5	-0.279562	1
smc-5	-0.279506	0
smc-5	-0.279388	0
smc-5	-0.279119	0
smc-5	-0.278642	4
smc-5	-0.277901	0
smc-5	-0.277613	5
smc-5	-0.276811	0
smc-5	-0.27275	4
smc-5	-0.272093	1
smc-5	-0.267026	1
smc-5	-0.26432	4
smc-5	-0.259945	0
smc-5	-0.259589	1
smc-5	-0.259569	0
smc-5	-0.259363	0
smc-5	-0.258553	0
smc-5	-0.257399	0
smc-5	-0.254683	0
smc-5	-0.254295	0
smc-5	-0.252376	0
smc-5	-0.252038	0
smc-5	-0.250016	1
smc-5	-0.249627	0
smc-5	-0.248852	0
smc-5	-0.244372	0
smc-5	-0.244316	3
smc-5	-0.244087	0
smc-5	-0.243959	0
smc-5	-0.242895	2
smc-5	-0.24237	0
smc-5	-0.241408	0
smc-5	-0.239277	0
smc-5	-0.23892	0
smc-5	-0.236852	0
smc-5	-0.233452	0
smc-5	-0.233028	0
smc-5	-0.23247	1
smc-5	-0.231913	0
smc-5	-0.231214	0
smc-5	-0.230354	0
smc-5	-0.230012	0
smc-5	-0.225809	0
smc-5	-0.225408	0
smc-5	-0.224787	2
[truncated: 2,778 more rows]
