# Supplementary material for: BRCA1/BRC-1 and SMC-5/6 regulate DNA repair pathway engagement during Caenorhabditis elegans meiosis
Source: eLife. 2024 Aug 8;13:e80687. doi: 10.7554/eLife.80687 (PMC11368404; doi:10.7554/eLife.80687)
Supplement: Figure 4—source data 3. — The number of hatched (Live), unhatched (Dead), or unfertilized F1 progeny scored in the brood viability experiment data used to generate Figure 4C and Figure 4—figure supplement 3. Wild type and smc-5(ok2421) data is shared with Figure 4—figure supplement 2A. [file elife-80687-fig4-data3.xlsx]

## Sheet: Summarized
								95% Binomial Confidence Interval
Genotype	Treatment	Window	Brood Size	Live	Dead	Unfertilized	Brood Viability	lowCI	upCI
brc-1(xoe4)	0 Rad	IH Window	1909	1761	148	621	0.922472	0.90961	0.933638
brc-1(xoe4)	2500 Rad	IH Window	1644	1460	184	529	0.888078	0.871924	0.902422
brc-1(xoe4)	5000 Rad	IH Window	2008	1374	634	524	0.684263	0.663597	0.704225
brc-1(xoe4)	0 Rad	Non-IH Window	1121	1036	85	1	0.924175	0.907189	0.938264
brc-1(xoe4)	2500 Rad	Non-IH Window	818	690	128	1	0.843521	0.817024	0.866806
brc-1(xoe4)	5000 Rad	Non-IH Window	859	423	436	2	0.492433	0.459109	0.525825
N2	0 Rad	IH Window	2514	2460	54	433	0.97852	0.972081	0.9835
N2	2500 Rad	IH Window	2870	2736	134	565	0.95331	0.944967	0.960441
N2	5000 Rad	IH Window	2807	2267	540	422	0.807624	0.792626	0.821781
N2	0 Rad	Non-IH Window	1349	1342	7	0	0.994811	0.989328	0.997484
N2	2500 Rad	Non-IH Window	1152	1136	16	0	0.986111	0.977558	0.991433
N2	5000 Rad	Non-IH Window	1107	959	148	0	0.866305	0.844985	0.885092
polq-1(tm2572)	0 Rad	IH Window	1541	1468	73	57	0.952628	0.94085	0.962155
polq-1(tm2572)	2500 Rad	IH Window	1595	1437	158	67	0.90094	0.885302	0.914652
polq-1(tm2572)	5000 Rad	IH Window	980	518	462	1	0.528571	0.497268	0.559652
polq-1(tm2572)	0 Rad	Non-IH Window	571	557	14	3	0.975482	0.959269	0.98534
polq-1(tm2572)	2500 Rad	Non-IH Window	336	307	29	0	0.91369	0.878794	0.939235
polq-1(tm2572)	5000 Rad	Non-IH Window	304	189	115	1	0.621711	0.565996	0.674387
polq-1(tm2572) MATED	0 Rad	IH Window	476	465	11	0	0.976891	0.959098	0.987048
polq-1(tm2572) MATED	2500 Rad	IH Window	1695	1610	85	4	0.949853	0.938407	0.959263
polq-1(tm2572) MATED	5000 Rad	IH Window	1174	1083	91	1	0.922487	0.905776	0.936442
polq-1(tm2572) MATED	0 Rad	Non-IH Window	171	169	2	0	0.988304	0.958364	0.996787
polq-1(tm2572) MATED	2500 Rad	Non-IH Window	450	426	24	2	0.946667	0.921871	0.963901
polq-1(tm2572) MATED	5000 Rad	Non-IH Window	392	368	24	3	0.938776	0.910519	0.958516
smc-5(ok2421)	0 Rad	IH Window	2789	2616	173	525	0.937971	0.928402	0.946334
smc-5(ok2421)	2500 Rad	IH Window	2246	1169	1077	274	0.520481	0.499803	0.541089
smc-5(ok2421)	5000 Rad	IH Window	2201	137	2064	80	0.0622444	0.0528938	0.0731204
smc-5(ok2421)	0 Rad	Non-IH Window	1188	1176	12	0	0.989899	0.982428	0.994212
smc-5(ok2421)	2500 Rad	Non-IH Window	1099	476	623	0	0.433121	0.404109	0.462599
smc-5(ok2421)	5000 Rad	Non-IH Window	1011	23	988	0	0.0227498	0.0152065	0.0339061
smc-5(ok2421);brc-1(xoe4)	0 Rad	IH Window	1448	1224	224	335	0.845304	0.825767	0.863014
smc-5(ok2421);brc-1(xoe4)	2500 Rad	IH Window	1641	725	916	570	0.441804	0.41794	0.465939
smc-5(ok2421);brc-1(xoe4)	5000 Rad	IH Window	1553	333	1220	281	0.214424	0.194729	0.235528
smc-5(ok2421);brc-1(xoe4)	0 Rad	Non-IH Window	828	746	82	6	0.900966	0.878731	0.919498
smc-5(ok2421);brc-1(xoe4)	2500 Rad	Non-IH Window	811	480	331	1	0.591862	0.55768	0.625178
smc-5(ok2421);brc-1(xoe4)	5000 Rad	Non-IH Window	849	182	667	0	0.21437	0.188084	0.243229
smc-5(ok2421);brc-1(xoe4) MATED	0 Rad	IH Window	544	244	300	4	0.448529	0.407242	0.490538
smc-5(ok2421);brc-1(xoe4) MATED	2500 Rad	IH Window	369	115	254	14	0.311653	0.26654	0.360648
smc-5(ok2421);brc-1(xoe4) MATED	5000 Rad	IH Window	571	61	510	0	0.10683	0.0840697	0.134845
smc-5(ok2421);brc-1(xoe4) MATED	0 Rad	Non-IH Window	157	104	53	0	0.66242	0.585357	0.731725
smc-5(ok2421);brc-1(xoe4) MATED	2500 Rad	Non-IH Window	103	62	41	0	0.601942	0.505387	0.691166
smc-5(ok2421);brc-1(xoe4) MATED	5000 Rad	Non-IH Window	257	17	240	0	0.0661479	0.0417062	0.103368
smc-5(ok2421);brc-1(xoe4);lig-4(ok716)	0 Rad	IH Window	2178	1654	524	298	0.759412	0.741014	0.776897
smc-5(ok2421);brc-1(xoe4);lig-4(ok716)	2500 Rad	IH Window	1894	677	1217	169	0.357445	0.33617	0.379296
smc-5(ok2421);brc-1(xoe4);lig-4(ok716)	5000 Rad	IH Window	1356	169	1187	146	0.124631	0.108104	0.143279
smc-5(ok2421);brc-1(xoe4);lig-4(ok716)	0 Rad	Non-IH Window	916	754	162	0	0.823144	0.797101	0.846488
smc-5(ok2421);brc-1(xoe4);lig-4(ok716)	2500 Rad	Non-IH Window	739	458	281	0	0.619756	0.584222	0.654052
smc-5(ok2421);brc-1(xoe4);lig-4(ok716)	5000 Rad	Non-IH Window	701	68	633	0	0.0970043	0.0772411	0.12116
smc-5(ok2421);brc-1(xoe4);polq-1(tm2572)	0 Rad	IH Window	683	401	282	268	0.587116	0.549804	0.623453
smc-5(ok2421);brc-1(xoe4);polq-1(tm2572)	2500 Rad	IH Window	710	101	609	132	0.142254	0.118482	0.169876
smc-5(ok2421);brc-1(xoe4);polq-1(tm2572)	5000 Rad	IH Window	670	30	640	71	0.0447761	0.031542	0.0632006
smc-5(ok2421);brc-1(xoe4);polq-1(tm2572)	0 Rad	Non-IH Window	361	261	100	15	0.722992	0.674663	0.766625
smc-5(ok2421);brc-1(xoe4);polq-1(tm2572)	2500 Rad	Non-IH Window	486	27	459	1	0.0555556	0.0384589	0.0796231
smc-5(ok2421);brc-1(xoe4);polq-1(tm2572)	5000 Rad	Non-IH Window	302	2	300	8	0.00662252	0.00181802	0.023821
smc-5(ok2421);brc-1(xoe4);polq-1(tm2572) MATED	0 Rad	IH Window	669	127	542	10	0.189836	0.161921	0.221292
smc-5(ok2421);brc-1(xoe4);polq-1(tm2572) MATED	2500 Rad	IH Window	445	89	356	2	0.2	0.165474	0.239662
smc-5(ok2421);brc-1(xoe4);polq-1(tm2572) MATED	5000 Rad	IH Window	625	25	600	1	0.04	0.0272385	0.0583816
smc-5(ok2421);brc-1(xoe4);polq-1(tm2572) MATED	0 Rad	Non-IH Window	194	87	107	4	0.448454	0.380146	0.518763
smc-5(ok2421);brc-1(xoe4);polq-1(tm2572) MATED	2500 Rad	Non-IH Window	115	7	108	1	0.0608696	0.0297951	0.120333
smc-5(ok2421);brc-1(xoe4);polq-1(tm2572) MATED	5000 Rad	Non-IH Window	233	9	224	0	0.0386266	0.0204524	0.0717673

## Sheet: Per-worm Counts
Genotype	Treatment	Window	Live	Dead	Unfertilized	Bsize
brc-1(xoe4)	0 Rad	IH Window	78	5	12	83
brc-1(xoe4)	0 Rad	IH Window	112	13	126	125
brc-1(xoe4)	0 Rad	IH Window	100	14	89	114
brc-1(xoe4)	0 Rad	IH Window	124	11	11	135
brc-1(xoe4)	0 Rad	IH Window	66	35	150	101
brc-1(xoe4)	0 Rad	IH Window	66	6	32	72
brc-1(xoe4)	0 Rad	IH Window	148	9	35	157
brc-1(xoe4)	0 Rad	IH Window	133	8	60	141
brc-1(xoe4)	0 Rad	IH Window	122	6	10	128
brc-1(xoe4)	0 Rad	IH Window	70	8	42	78
brc-1(xoe4)	0 Rad	IH Window	124	6	8	130
brc-1(xoe4)	0 Rad	IH Window	177	12	4	189
brc-1(xoe4)	0 Rad	IH Window	154	6	15	160
brc-1(xoe4)	0 Rad	IH Window	151	6	4	157
brc-1(xoe4)	0 Rad	IH Window	136	3	23	139
brc-1(xoe4)	0 Rad	Non-IH Window	76	3	0	79
brc-1(xoe4)	0 Rad	Non-IH Window	74	5	0	79
brc-1(xoe4)	0 Rad	Non-IH Window	67	4	0	71
brc-1(xoe4)	0 Rad	Non-IH Window	74	1	0	75
brc-1(xoe4)	0 Rad	Non-IH Window	32	39	0	71
brc-1(xoe4)	0 Rad	Non-IH Window	76	1	0	77
brc-1(xoe4)	0 Rad	Non-IH Window	62	2	0	64
brc-1(xoe4)	0 Rad	Non-IH Window	74	5	0	79
brc-1(xoe4)	0 Rad	Non-IH Window	72	1	0	73
brc-1(xoe4)	0 Rad	Non-IH Window	69	5	1	74
brc-1(xoe4)	0 Rad	Non-IH Window	80	3	0	83
brc-1(xoe4)	0 Rad	Non-IH Window	70	1	0	71
brc-1(xoe4)	0 Rad	Non-IH Window	69	4	0	73
brc-1(xoe4)	0 Rad	Non-IH Window	70	1	0	71
brc-1(xoe4)	0 Rad	Non-IH Window	71	10	0	81
brc-1(xoe4)	2500 Rad	IH Window	68	9	64	77
brc-1(xoe4)	2500 Rad	IH Window	105	22	66	127
brc-1(xoe4)	2500 Rad	IH Window	123	17	56	140
brc-1(xoe4)	2500 Rad	IH Window	107	16	63	123
brc-1(xoe4)	2500 Rad	IH Window	27	17	58	44
brc-1(xoe4)	2500 Rad	IH Window	116	7	20	123
brc-1(xoe4)	2500 Rad	IH Window	131	16	10	147
brc-1(xoe4)	2500 Rad	IH Window	141	23	45	164
brc-1(xoe4)	2500 Rad	IH Window	84	9	53	93
brc-1(xoe4)	2500 Rad	IH Window	133	24	51	157
brc-1(xoe4)	2500 Rad	IH Window	136	8	18	144
brc-1(xoe4)	2500 Rad	IH Window	140	10	25	150
brc-1(xoe4)	2500 Rad	IH Window	149	6	0	155
brc-1(xoe4)	2500 Rad	Non-IH Window	0	9	0	9
brc-1(xoe4)	2500 Rad	Non-IH Window	54	9	0	63
brc-1(xoe4)	2500 Rad	Non-IH Window	56	4	0	60
brc-1(xoe4)	2500 Rad	Non-IH Window	44	14	1	58
brc-1(xoe4)	2500 Rad	Non-IH Window	57	12	0	69
brc-1(xoe4)	2500 Rad	Non-IH Window	48	11	0	59
brc-1(xoe4)	2500 Rad	Non-IH Window	48	11	0	59
brc-1(xoe4)	2500 Rad	Non-IH Window	48	4	0	52
brc-1(xoe4)	2500 Rad	Non-IH Window	46	11	0	57
brc-1(xoe4)	2500 Rad	Non-IH Window	60	12	0	72
brc-1(xoe4)	2500 Rad	Non-IH Window	58	9	0	67
brc-1(xoe4)	2500 Rad	Non-IH Window	63	6	0	69
brc-1(xoe4)	2500 Rad	Non-IH Window	59	6	0	65
brc-1(xoe4)	2500 Rad	Non-IH Window	49	10	0	59
brc-1(xoe4)	5000 Rad	IH Window	69	61	120	130
brc-1(xoe4)	5000 Rad	IH Window	63	36	83	99
brc-1(xoe4)	5000 Rad	IH Window	78	41	66	119
brc-1(xoe4)	5000 Rad	IH Window	52	72	35	124
brc-1(xoe4)	5000 Rad	IH Window	54	58	44	112
brc-1(xoe4)	5000 Rad	IH Window	114	21	22	135
brc-1(xoe4)	5000 Rad	IH Window	51	39	2	90
brc-1(xoe4)	5000 Rad	IH Window	109	28	25	137
brc-1(xoe4)	5000 Rad	IH Window	93	42	52	135
brc-1(xoe4)	5000 Rad	IH Window	109	35	21	144
brc-1(xoe4)	5000 Rad	IH Window	90	58	30	148
brc-1(xoe4)	5000 Rad	IH Window	56	63	11	119
brc-1(xoe4)	5000 Rad	IH Window	119	37	12	156
brc-1(xoe4)	5000 Rad	IH Window	143	25	0	168
brc-1(xoe4)	5000 Rad	IH Window	174	18	1	192
brc-1(xoe4)	5000 Rad	Non-IH Window	27	37	1	64
brc-1(xoe4)	5000 Rad	Non-IH Window	38	25	0	63
brc-1(xoe4)	5000 Rad	Non-IH Window	35	28	0	63
brc-1(xoe4)	5000 Rad	Non-IH Window	3	44	0	47
brc-1(xoe4)	5000 Rad	Non-IH Window	20	50	1	70
brc-1(xoe4)	5000 Rad	Non-IH Window	54	15	0	69
brc-1(xoe4)	5000 Rad	Non-IH Window	12	27	0	39
brc-1(xoe4)	5000 Rad	Non-IH Window	34	20	0	54
brc-1(xoe4)	5000 Rad	Non-IH Window	28	33	0	61
brc-1(xoe4)	5000 Rad	Non-IH Window	34	10	0	44
brc-1(xoe4)	5000 Rad	Non-IH Window	21	40	0	61
brc-1(xoe4)	5000 Rad	Non-IH Window	7	42	0	49
brc-1(xoe4)	5000 Rad	Non-IH Window	33	27	0	60
brc-1(xoe4)	5000 Rad	Non-IH Window	29	24	0	53
brc-1(xoe4)	5000 Rad	Non-IH Window	48	14	0	62
N2	0 Rad	IH Window	104	4	36	108
N2	0 Rad	IH Window	108	6	39	114
N2	0 Rad	IH Window	165	13	114	178
N2	0 Rad	IH Window	145	2	51	147
N2	0 Rad	IH Window	154	6	6	160
N2	0 Rad	IH Window	168	1	40	169
N2	0 Rad	IH Window	198	3	5	201
N2	0 Rad	IH Window	203	0	11	203
N2	0 Rad	IH Window	211	2	20	213
N2	0 Rad	IH Window	182	5	18	187
N2	0 Rad	IH Window	79	3	7	82
N2	0 Rad	IH Window	136	0	39	136
N2	0 Rad	IH Window	221	6	25	227
N2	0 Rad	IH Window	214	0	9	214
N2	0 Rad	IH Window	172	3	13	175
N2	0 Rad	Non-IH Window	119	1	0	120
N2	0 Rad	Non-IH Window	129	0	0	129
N2	0 Rad	Non-IH Window	99	1	0	100
N2	0 Rad	Non-IH Window	120	1	0	121
N2	0 Rad	Non-IH Window	96	0	0	96
N2	0 Rad	Non-IH Window	85	0	0	85
N2	0 Rad	Non-IH Window	67	0	0	67
N2	0 Rad	Non-IH Window	87	0	0	87
N2	0 Rad	Non-IH Window	81	0	0	81
N2	0 Rad	Non-IH Window	80	2	0	82
N2	0 Rad	Non-IH Window	48	0	0	48
N2	0 Rad	Non-IH Window	83	2	0	85
N2	0 Rad	Non-IH Window	75	0	0	75
N2	0 Rad	Non-IH Window	83	0	0	83
N2	0 Rad	Non-IH Window	90	0	0	90
N2	2500 Rad	IH Window	152	4	43	156
N2	2500 Rad	IH Window	195	7	64	202
N2	2500 Rad	IH Window	144	10	91	154
N2	2500 Rad	IH Window	175	5	95	180
N2	2500 Rad	IH Window	182	15	34	197
N2	2500 Rad	IH Window	188	8	24	196
N2	2500 Rad	IH Window	205	3	20	208
N2	2500 Rad	IH Window	213	8	28	221
N2	2500 Rad	IH Window	199	15	27	214
N2	2500 Rad	IH Window	185	8	25	193
N2	2500 Rad	IH Window	226	10	21	236
N2	2500 Rad	IH Window	204	2	0	206
N2	2500 Rad	IH Window	161	7	26	168
N2	2500 Rad	IH Window	159	13	25	172
N2	2500 Rad	IH Window	148	19	42	167
N2	2500 Rad	Non-IH Window	120	0	0	120
N2	2500 Rad	Non-IH Window	94	1	0	95
N2	2500 Rad	Non-IH Window	92	1	0	93
N2	2500 Rad	Non-IH Window	79	0	0	79
N2	2500 Rad	Non-IH Window	79	1	0	80
N2	2500 Rad	Non-IH Window	61	3	0	64
N2	2500 Rad	Non-IH Window	79	0	0	79
N2	2500 Rad	Non-IH Window	64	0	0	64
N2	2500 Rad	Non-IH Window	59	3	0	62
N2	2500 Rad	Non-IH Window	78	0	0	78
N2	2500 Rad	Non-IH Window	75	0	0	75
N2	2500 Rad	Non-IH Window	69	1	0	70
N2	2500 Rad	Non-IH Window	65	1	0	66
N2	2500 Rad	Non-IH Window	57	1	0	58
N2	2500 Rad	Non-IH Window	65	4	0	69
N2	5000 Rad	IH Window	162	5	45	167
N2	5000 Rad	IH Window	147	20	20	167
N2	5000 Rad	IH Window	188	26	22	214
N2	5000 Rad	IH Window	153	20	43	173
N2	5000 Rad	IH Window	166	13	34	179
N2	5000 Rad	IH Window	166	12	55	178
N2	5000 Rad	IH Window	126	58	22	184
N2	5000 Rad	IH Window	180	9	35	189
N2	5000 Rad	IH Window	196	16	9	212
N2	5000 Rad	IH Window	186	14	46	200
N2	5000 Rad	IH Window	88	122	2	210
N2	5000 Rad	IH Window	63	122	2	185
N2	5000 Rad	IH Window	147	9	40	156
N2	5000 Rad	IH Window	161	54	1	215
N2	5000 Rad	IH Window	138	40	46	178
N2	5000 Rad	Non-IH Window	73	6	0	79
N2	5000 Rad	Non-IH Window	85	3	0	88
N2	5000 Rad	Non-IH Window	85	2	0	87
N2	5000 Rad	Non-IH Window	79	2	0	81
N2	5000 Rad	Non-IH Window	66	1	0	67
N2	5000 Rad	Non-IH Window	78	4	0	82
N2	5000 Rad	Non-IH Window	42	16	0	58
N2	5000 Rad	Non-IH Window	82	2	0	84
N2	5000 Rad	Non-IH Window	74	1	0	75
N2	5000 Rad	Non-IH Window	74	2	0	76
N2	5000 Rad	Non-IH Window	21	36	0	57
N2	5000 Rad	Non-IH Window	11	46	0	57
N2	5000 Rad	Non-IH Window	70	0	0	70
N2	5000 Rad	Non-IH Window	46	20	0	66
N2	5000 Rad	Non-IH Window	73	7	0	80
polq-1(tm2572)	0 Rad	IH Window	256	3	0	259
polq-1(tm2572)	0 Rad	IH Window	151	2	0	153
polq-1(tm2572)	0 Rad	IH Window	235	4	3	239
polq-1(tm2572)	0 Rad	IH Window	256	7	8	263
polq-1(tm2572)	0 Rad	IH Window	2	0	8	2
polq-1(tm2572)	0 Rad	IH Window	61	1	0	62
polq-1(tm2572)	0 Rad	IH Window	114	30	1	144
polq-1(tm2572)	0 Rad	IH Window	189	17	0	206
polq-1(tm2572)	0 Rad	IH Window	192	3	0	195
polq-1(tm2572)	0 Rad	IH Window	12	6	37	18
polq-1(tm2572)	0 Rad	Non-IH Window	70	0	0	70
polq-1(tm2572)	0 Rad	Non-IH Window	64	0	0	64
polq-1(tm2572)	0 Rad	Non-IH Window	82	0	0	82
polq-1(tm2572)	0 Rad	Non-IH Window	80	2	0	82
polq-1(tm2572)	0 Rad	Non-IH Window	87	3	0	90
polq-1(tm2572)	0 Rad	Non-IH Window	36	0	0	36
polq-1(tm2572)	0 Rad	Non-IH Window	33	5	0	38
polq-1(tm2572)	0 Rad	Non-IH Window	33	0	0	33
polq-1(tm2572)	0 Rad	Non-IH Window	56	1	0	57
polq-1(tm2572)	0 Rad	Non-IH Window	16	3	3	19
polq-1(tm2572)	2500 Rad	IH Window	137	30	0	167
polq-1(tm2572)	2500 Rad	IH Window	219	9	0	228
polq-1(tm2572)	2500 Rad	IH Window	225	7	2	232
polq-1(tm2572)	2500 Rad	IH Window	227	13	0	240
polq-1(tm2572)	2500 Rad	IH Window	144	3	13	147
polq-1(tm2572)	2500 Rad	IH Window	174	15	14	189
polq-1(tm2572)	2500 Rad	IH Window	61	9	0	70
polq-1(tm2572)	2500 Rad	IH Window	173	17	20	190
polq-1(tm2572)	2500 Rad	IH Window	66	28	0	94
polq-1(tm2572)	2500 Rad	IH Window	11	27	18	38
polq-1(tm2572)	2500 Rad	Non-IH Window	66	4	0	70
polq-1(tm2572)	2500 Rad	Non-IH Window	75	1	0	76
polq-1(tm2572)	2500 Rad	Non-IH Window	60	7	0	67
polq-1(tm2572)	2500 Rad	Non-IH Window	7	1	0	8
polq-1(tm2572)	2500 Rad	Non-IH Window	39	7	0	46
polq-1(tm2572)	2500 Rad	Non-IH Window	7	3	0	10
polq-1(tm2572)	2500 Rad	Non-IH Window	49	4	0	53
polq-1(tm2572)	2500 Rad	Non-IH Window	4	2	0	6
polq-1(tm2572)	2500 Rad	Non-IH Window	0	0	0	0
polq-1(tm2572)	5000 Rad	IH Window	73	64	0	137
polq-1(tm2572)	5000 Rad	IH Window	0	0	0	0
polq-1(tm2572)	5000 Rad	IH Window	56	85	0	141
polq-1(tm2572)	5000 Rad	IH Window	12	5	0	17
polq-1(tm2572)	5000 Rad	IH Window	82	106	0	188
polq-1(tm2572)	5000 Rad	IH Window	22	38	0	60
polq-1(tm2572)	5000 Rad	IH Window	49	47	0	96
polq-1(tm2572)	5000 Rad	IH Window	123	53	1	176
polq-1(tm2572)	5000 Rad	IH Window	60	44	0	104
polq-1(tm2572)	5000 Rad	IH Window	41	20	0	61
polq-1(tm2572)	5000 Rad	Non-IH Window	39	16	0	55
polq-1(tm2572)	5000 Rad	Non-IH Window	0	0	0	0
polq-1(tm2572)	5000 Rad	Non-IH Window	38	30	0	68
polq-1(tm2572)	5000 Rad	Non-IH Window	0	0	0	0
polq-1(tm2572)	5000 Rad	Non-IH Window	46	8	0	54
polq-1(tm2572)	5000 Rad	Non-IH Window	8	18	1	26
polq-1(tm2572)	5000 Rad	Non-IH Window	6	11	0	17
polq-1(tm2572)	5000 Rad	Non-IH Window	29	13	0	42
polq-1(tm2572)	5000 Rad	Non-IH Window	16	13	0	29
polq-1(tm2572)	5000 Rad	Non-IH Window	7	6	0	13
polq-1(tm2572) MATED	0 Rad	IH Window	231	8	0	239
polq-1(tm2572) MATED	0 Rad	IH Window	48	3	0	51
polq-1(tm2572) MATED	0 Rad	IH Window	18	0	0	18
polq-1(tm2572) MATED	0 Rad	IH Window	168	0	0	168
polq-1(tm2572) MATED	0 Rad	IH Window	191	1	0	192
polq-1(tm2572) MATED	0 Rad	Non-IH Window	67	0	0	67
polq-1(tm2572) MATED	0 Rad	Non-IH Window	29	0	0	29
polq-1(tm2572) MATED	0 Rad	Non-IH Window	35	2	0	37
polq-1(tm2572) MATED	0 Rad	Non-IH Window	38	0	0	38
polq-1(tm2572) MATED	0 Rad	Non-IH Window	59	4	0	63
polq-1(tm2572) MATED	2500 Rad	IH Window	222	3	0	225
polq-1(tm2572) MATED	2500 Rad	IH Window	217	3	0	220
polq-1(tm2572) MATED	2500 Rad	IH Window	185	0	0	185
polq-1(tm2572) MATED	2500 Rad	IH Window	124	9	0	133
polq-1(tm2572) MATED	2500 Rad	IH Window	233	10	0	243
polq-1(tm2572) MATED	2500 Rad	IH Window	134	25	1	159
polq-1(tm2572) MATED	2500 Rad	IH Window	171	24	3	195
polq-1(tm2572) MATED	2500 Rad	IH Window	133	2	0	135
polq-1(tm2572) MATED	2500 Rad	IH Window	0	8	0	8
polq-1(tm2572) MATED	2500 Rad	IH Window	0	0	0	0
polq-1(tm2572) MATED	2500 Rad	Non-IH Window	51	1	1	52
polq-1(tm2572) MATED	2500 Rad	Non-IH Window	53	6	1	59
polq-1(tm2572) MATED	2500 Rad	Non-IH Window	64	2	0	66
polq-1(tm2572) MATED	2500 Rad	Non-IH Window	7	2	0	9
polq-1(tm2572) MATED	2500 Rad	Non-IH Window	71	1	0	72
polq-1(tm2572) MATED	2500 Rad	Non-IH Window	23	1	0	24
polq-1(tm2572) MATED	2500 Rad	Non-IH Window	55	7	0	62
polq-1(tm2572) MATED	2500 Rad	Non-IH Window	43	0	0	43
polq-1(tm2572) MATED	2500 Rad	Non-IH Window	0	0	0	0
polq-1(tm2572) MATED	2500 Rad	Non-IH Window	0	0	0	0
polq-1(tm2572) MATED	5000 Rad	IH Window	51	0	0	51
polq-1(tm2572) MATED	5000 Rad	IH Window	162	18	0	180
polq-1(tm2572) MATED	5000 Rad	IH Window	100	5	0	105
polq-1(tm2572) MATED	5000 Rad	IH Window	36	1	0	37
polq-1(tm2572) MATED	5000 Rad	IH Window	162	11	0	173
polq-1(tm2572) MATED	5000 Rad	IH Window	57	1	0	58
polq-1(tm2572) MATED	5000 Rad	IH Window	165	5	0	170
polq-1(tm2572) MATED	5000 Rad	IH Window	137	12	0	149
polq-1(tm2572) MATED	5000 Rad	IH Window	146	12	0	158
polq-1(tm2572) MATED	5000 Rad	IH Window	67	26	1	93
polq-1(tm2572) MATED	5000 Rad	Non-IH Window	0	0	0	0
polq-1(tm2572) MATED	5000 Rad	Non-IH Window	68	2	0	70
polq-1(tm2572) MATED	5000 Rad	Non-IH Window	56	1	0	57
polq-1(tm2572) MATED	5000 Rad	Non-IH Window	6	5	0	11
polq-1(tm2572) MATED	5000 Rad	Non-IH Window	76	2	0	78
polq-1(tm2572) MATED	5000 Rad	Non-IH Window	17	3	3	20
polq-1(tm2572) MATED	5000 Rad	Non-IH Window	42	3	0	45
polq-1(tm2572) MATED	5000 Rad	Non-IH Window	44	1	0	45
polq-1(tm2572) MATED	5000 Rad	Non-IH Window	46	3	0	49
polq-1(tm2572) MATED	5000 Rad	Non-IH Window	13	4	0	17
smc-5(ok2421)	0 Rad	IH Window	92	5	20	97
smc-5(ok2421)	0 Rad	IH Window	188	5	11	193
smc-5(ok2421)	0 Rad	IH Window	178	17	49	195
smc-5(ok2421)	0 Rad	IH Window	170	12	77	182
smc-5(ok2421)	0 Rad	IH Window	127	21	164	148
smc-5(ok2421)	0 Rad	IH Window	164	5	40	169
smc-5(ok2421)	0 Rad	IH Window	175	8	17	183
smc-5(ok2421)	0 Rad	IH Window	222	12	5	234
smc-5(ok2421)	0 Rad	IH Window	102	7	8	109
smc-5(ok2421)	0 Rad	IH Window	156	10	47	166
smc-5(ok2421)	0 Rad	IH Window	238	33	8	271
smc-5(ok2421)	0 Rad	IH Window	204	4	26	208
smc-5(ok2421)	0 Rad	IH Window	217	9	20	226
smc-5(ok2421)	0 Rad	IH Window	157	13	2	170
smc-5(ok2421)	0 Rad	IH Window	226	12	31	238
smc-5(ok2421)	0 Rad	Non-IH Window	60	4	0	64
smc-5(ok2421)	0 Rad	Non-IH Window	93	0	0	93
smc-5(ok2421)	0 Rad	Non-IH Window	95	0	0	95
smc-5(ok2421)	0 Rad	Non-IH Window	83	1	0	84
smc-5(ok2421)	0 Rad	Non-IH Window	99	2	0	101
smc-5(ok2421)	0 Rad	Non-IH Window	67	0	0	67
smc-5(ok2421)	0 Rad	Non-IH Window	76	0	0	76
smc-5(ok2421)	0 Rad	Non-IH Window	81	1	0	82
smc-5(ok2421)	0 Rad	Non-IH Window	83	0	0	83
smc-5(ok2421)	0 Rad	Non-IH Window	85	1	0	86
smc-5(ok2421)	0 Rad	Non-IH Window	70	0	0	70
smc-5(ok2421)	0 Rad	Non-IH Window	82	0	0	82
smc-5(ok2421)	0 Rad	Non-IH Window	76	0	0	76
smc-5(ok2421)	0 Rad	Non-IH Window	61	2	0	63
smc-5(ok2421)	0 Rad	Non-IH Window	65	1	0	66
smc-5(ok2421)	2500 Rad	IH Window	70	112	49	182
smc-5(ok2421)	2500 Rad	IH Window	61	59	33	120
smc-5(ok2421)	2500 Rad	IH Window	74	102	54	176
smc-5(ok2421)	2500 Rad	IH Window	62	79	6	141
smc-5(ok2421)	2500 Rad	IH Window	46	36	28	82
smc-5(ok2421)	2500 Rad	IH Window	92	38	38	130
smc-5(ok2421)	2500 Rad	IH Window	106	71	1	177
smc-5(ok2421)	2500 Rad	IH Window	89	79	6	168
smc-5(ok2421)	2500 Rad	IH Window	93	78	11	171
smc-5(ok2421)	2500 Rad	IH Window	93	71	6	164
smc-5(ok2421)	2500 Rad	IH Window	71	64	19	135
smc-5(ok2421)	2500 Rad	IH Window	74	88	1	162
smc-5(ok2421)	2500 Rad	IH Window	78	73	6	151
smc-5(ok2421)	2500 Rad	IH Window	77	62	0	139
smc-5(ok2421)	2500 Rad	IH Window	83	65	16	148
smc-5(ok2421)	2500 Rad	Non-IH Window	21	57	0	78
smc-5(ok2421)	2500 Rad	Non-IH Window	23	58	0	81
smc-5(ok2421)	2500 Rad	Non-IH Window	25	53	0	78
smc-5(ok2421)	2500 Rad	Non-IH Window	24	68	0	92
smc-5(ok2421)	2500 Rad	Non-IH Window	36	54	0	90
smc-5(ok2421)	2500 Rad	Non-IH Window	56	25	0	81
smc-5(ok2421)	2500 Rad	Non-IH Window	42	27	0	69
smc-5(ok2421)	2500 Rad	Non-IH Window	45	35	0	80
smc-5(ok2421)	2500 Rad	Non-IH Window	33	32	0	65
smc-5(ok2421)	2500 Rad	Non-IH Window	43	42	0	85
smc-5(ok2421)	2500 Rad	Non-IH Window	25	41	0	66
smc-5(ok2421)	2500 Rad	Non-IH Window	21	33	0	54
smc-5(ok2421)	2500 Rad	Non-IH Window	27	39	0	66
smc-5(ok2421)	2500 Rad	Non-IH Window	21	22	0	43
smc-5(ok2421)	2500 Rad	Non-IH Window	34	37	0	71
smc-5(ok2421)	5000 Rad	IH Window	1	144	19	145
smc-5(ok2421)	5000 Rad	IH Window	0	137	6	137
smc-5(ok2421)	5000 Rad	IH Window	0	129	12	129
smc-5(ok2421)	5000 Rad	IH Window	0	155	1	155
smc-5(ok2421)	5000 Rad	IH Window	0	134	1	134
smc-5(ok2421)	5000 Rad	IH Window	20	156	1	176
smc-5(ok2421)	5000 Rad	IH Window	19	143	0	162
smc-5(ok2421)	5000 Rad	IH Window	14	25	0	39
smc-5(ok2421)	5000 Rad	IH Window	9	123	5	132
smc-5(ok2421)	5000 Rad	IH Window	10	144	0	154
smc-5(ok2421)	5000 Rad	IH Window	11	169	0	180
smc-5(ok2421)	5000 Rad	IH Window	14	167	2	181
smc-5(ok2421)	5000 Rad	IH Window	11	153	0	164
smc-5(ok2421)	5000 Rad	IH Window	16	145	12	161
smc-5(ok2421)	5000 Rad	IH Window	12	140	21	152
smc-5(ok2421)	5000 Rad	Non-IH Window	1	90	0	91
smc-5(ok2421)	5000 Rad	Non-IH Window	0	63	0	63
smc-5(ok2421)	5000 Rad	Non-IH Window	0	74	0	74
smc-5(ok2421)	5000 Rad	Non-IH Window	0	78	0	78
smc-5(ok2421)	5000 Rad	Non-IH Window	0	72	0	72
smc-5(ok2421)	5000 Rad	Non-IH Window	3	67	0	70
smc-5(ok2421)	5000 Rad	Non-IH Window	3	54	0	57
smc-5(ok2421)	5000 Rad	Non-IH Window	4	40	0	44
smc-5(ok2421)	5000 Rad	Non-IH Window	1	60	0	61
smc-5(ok2421)	5000 Rad	Non-IH Window	1	77	0	78
smc-5(ok2421)	5000 Rad	Non-IH Window	3	59	0	62
smc-5(ok2421)	5000 Rad	Non-IH Window	2	66	0	68
smc-5(ok2421)	5000 Rad	Non-IH Window	0	62	0	62
smc-5(ok2421)	5000 Rad	Non-IH Window	1	69	0	70
smc-5(ok2421)	5000 Rad	Non-IH Window	4	57	0	61
smc-5(ok2421);brc-1(xoe4)	0 Rad	IH Window	113	8	57	121
smc-5(ok2421);brc-1(xoe4)	0 Rad	IH Window	90	30	93	120
smc-5(ok2421);brc-1(xoe4)	0 Rad	IH Window	109	2	30	111
smc-5(ok2421);brc-1(xoe4)	0 Rad	IH Window	91	14	75	105
smc-5(ok2421);brc-1(xoe4)	0 Rad	IH Window	126	22	7	148
smc-5(ok2421);brc-1(xoe4)	0 Rad	IH Window	48	4	2	52
smc-5(ok2421);brc-1(xoe4)	0 Rad	IH Window	121	16	41	137
smc-5(ok2421);brc-1(xoe4)	0 Rad	IH Window	107	8	17	115
smc-5(ok2421);brc-1(xoe4)	0 Rad	IH Window	154	19	1	173
smc-5(ok2421);brc-1(xoe4)	0 Rad	IH Window	38	42	6	80
smc-5(ok2421);brc-1(xoe4)	0 Rad	IH Window	4	6	0	10
smc-5(ok2421);brc-1(xoe4)	0 Rad	IH Window	96	39	0	135
smc-5(ok2421);brc-1(xoe4)	0 Rad	IH Window	2	0	0	2
smc-5(ok2421);brc-1(xoe4)	0 Rad	IH Window	125	14	6	139
smc-5(ok2421);brc-1(xoe4)	0 Rad	Non-IH Window	68	2	0	70
smc-5(ok2421);brc-1(xoe4)	0 Rad	Non-IH Window	63	9	0	72
smc-5(ok2421);brc-1(xoe4)	0 Rad	Non-IH Window	64	2	4	66
smc-5(ok2421);brc-1(xoe4)	0 Rad	Non-IH Window	73	1	0	74
smc-5(ok2421);brc-1(xoe4)	0 Rad	Non-IH Window	2	1	0	3
smc-5(ok2421);brc-1(xoe4)	0 Rad	Non-IH Window	66	5	0	71
smc-5(ok2421);brc-1(xoe4)	0 Rad	Non-IH Window	27	2	1	29
smc-5(ok2421);brc-1(xoe4)	0 Rad	Non-IH Window	70	7	1	77
smc-5(ok2421);brc-1(xoe4)	0 Rad	Non-IH Window	76	3	0	79
smc-5(ok2421);brc-1(xoe4)	0 Rad	Non-IH Window	76	4	0	80
smc-5(ok2421);brc-1(xoe4)	0 Rad	Non-IH Window	42	31	0	73
smc-5(ok2421);brc-1(xoe4)	0 Rad	Non-IH Window	6	7	0	13
smc-5(ok2421);brc-1(xoe4)	0 Rad	Non-IH Window	27	7	0	34
smc-5(ok2421);brc-1(xoe4)	0 Rad	Non-IH Window	1	0	0	1
smc-5(ok2421);brc-1(xoe4)	0 Rad	Non-IH Window	85	1	0	86
smc-5(ok2421);brc-1(xoe4)	2500 Rad	IH Window	43	44	87	87
smc-5(ok2421);brc-1(xoe4)	2500 Rad	IH Window	50	34	98	84
smc-5(ok2421);brc-1(xoe4)	2500 Rad	IH Window	60	18	164	78
smc-5(ok2421);brc-1(xoe4)	2500 Rad	IH Window	56	55	18	111
smc-5(ok2421);brc-1(xoe4)	2500 Rad	IH Window	59	70	121	129
smc-5(ok2421);brc-1(xoe4)	2500 Rad	IH Window	79	65	4	144
smc-5(ok2421);brc-1(xoe4)	2500 Rad	IH Window	104	81	21	185
smc-5(ok2421);brc-1(xoe4)	2500 Rad	IH Window	2	71	0	73
smc-5(ok2421);brc-1(xoe4)	2500 Rad	IH Window	62	68	5	130
smc-5(ok2421);brc-1(xoe4)	2500 Rad	IH Window	41	108	12	149
smc-5(ok2421);brc-1(xoe4)	2500 Rad	IH Window	5	96	2	101
smc-5(ok2421);brc-1(xoe4)	2500 Rad	IH Window	75	52	8	127
smc-5(ok2421);brc-1(xoe4)	2500 Rad	IH Window	85	48	25	133
smc-5(ok2421);brc-1(xoe4)	2500 Rad	IH Window	3	54	0	57
smc-5(ok2421);brc-1(xoe4)	2500 Rad	IH Window	1	52	5	53
smc-5(ok2421);brc-1(xoe4)	2500 Rad	Non-IH Window	23	33	0	56
smc-5(ok2421);brc-1(xoe4)	2500 Rad	Non-IH Window	41	24	0	65
smc-5(ok2421);brc-1(xoe4)	2500 Rad	Non-IH Window	40	19	0	59
smc-5(ok2421);brc-1(xoe4)	2500 Rad	Non-IH Window	41	24	0	65
smc-5(ok2421);brc-1(xoe4)	2500 Rad	Non-IH Window	47	24	0	71
smc-5(ok2421);brc-1(xoe4)	2500 Rad	Non-IH Window	49	22	0	71
smc-5(ok2421);brc-1(xoe4)	2500 Rad	Non-IH Window	56	17	0	73
smc-5(ok2421);brc-1(xoe4)	2500 Rad	Non-IH Window	44	14	0	58
smc-5(ok2421);brc-1(xoe4)	2500 Rad	Non-IH Window	35	22	0	57
smc-5(ok2421);brc-1(xoe4)	2500 Rad	Non-IH Window	3	52	0	55
smc-5(ok2421);brc-1(xoe4)	2500 Rad	Non-IH Window	42	27	0	69
smc-5(ok2421);brc-1(xoe4)	2500 Rad	Non-IH Window	46	21	0	67
smc-5(ok2421);brc-1(xoe4)	2500 Rad	Non-IH Window	0	23	0	23
smc-5(ok2421);brc-1(xoe4)	2500 Rad	Non-IH Window	13	9	1	22
smc-5(ok2421);brc-1(xoe4)	5000 Rad	IH Window	19	51	62	70
smc-5(ok2421);brc-1(xoe4)	5000 Rad	IH Window	28	73	56	101
smc-5(ok2421);brc-1(xoe4)	5000 Rad	IH Window	33	68	25	101
smc-5(ok2421);brc-1(xoe4)	5000 Rad	IH Window	27	77	46	104
smc-5(ok2421);brc-1(xoe4)	5000 Rad	IH Window	34	73	39	107
smc-5(ok2421);brc-1(xoe4)	5000 Rad	IH Window	28	85	8	113
smc-5(ok2421);brc-1(xoe4)	5000 Rad	IH Window	25	48	6	73
smc-5(ok2421);brc-1(xoe4)	5000 Rad	IH Window	29	101	11	130
smc-5(ok2421);brc-1(xoe4)	5000 Rad	IH Window	36	112	10	148
smc-5(ok2421);brc-1(xoe4)	5000 Rad	IH Window	29	124	5	153
smc-5(ok2421);brc-1(xoe4)	5000 Rad	IH Window	25	106	1	131
smc-5(ok2421);brc-1(xoe4)	5000 Rad	IH Window	4	68	0	72
smc-5(ok2421);brc-1(xoe4)	5000 Rad	IH Window	9	101	1	110
smc-5(ok2421);brc-1(xoe4)	5000 Rad	IH Window	3	84	5	87
smc-5(ok2421);brc-1(xoe4)	5000 Rad	IH Window	4	49	6	53
smc-5(ok2421);brc-1(xoe4)	5000 Rad	Non-IH Window	22	36	0	58
smc-5(ok2421);brc-1(xoe4)	5000 Rad	Non-IH Window	16	52	0	68
smc-5(ok2421);brc-1(xoe4)	5000 Rad	Non-IH Window	8	53	0	61
smc-5(ok2421);brc-1(xoe4)	5000 Rad	Non-IH Window	23	36	0	59
smc-5(ok2421);brc-1(xoe4)	5000 Rad	Non-IH Window	20	28	0	48
smc-5(ok2421);brc-1(xoe4)	5000 Rad	Non-IH Window	12	48	0	60
smc-5(ok2421);brc-1(xoe4)	5000 Rad	Non-IH Window	10	53	0	63
smc-5(ok2421);brc-1(xoe4)	5000 Rad	Non-IH Window	9	63	0	72
smc-5(ok2421);brc-1(xoe4)	5000 Rad	Non-IH Window	17	55	0	72
smc-5(ok2421);brc-1(xoe4)	5000 Rad	Non-IH Window	20	60	0	80
smc-5(ok2421);brc-1(xoe4)	5000 Rad	Non-IH Window	18	39	0	57
smc-5(ok2421);brc-1(xoe4)	5000 Rad	Non-IH Window	1	22	0	23
smc-5(ok2421);brc-1(xoe4)	5000 Rad	Non-IH Window	1	31	0	32
smc-5(ok2421);brc-1(xoe4)	5000 Rad	Non-IH Window	3	58	0	61
smc-5(ok2421);brc-1(xoe4)	5000 Rad	Non-IH Window	2	33	0	35
smc-5(ok2421);brc-1(xoe4) MATED	0 Rad	IH Window	192	29	1	221
smc-5(ok2421);brc-1(xoe4) MATED	0 Rad	IH Window	5	37	0	42
smc-5(ok2421);brc-1(xoe4) MATED	0 Rad	IH Window	9	99	2	108
smc-5(ok2421);brc-1(xoe4) MATED	0 Rad	IH Window	38	135	1	173
smc-5(ok2421);brc-1(xoe4) MATED	0 Rad	Non-IH Window	62	12	0	74
smc-5(ok2421);brc-1(xoe4) MATED	0 Rad	Non-IH Window	1	6	0	7
smc-5(ok2421);brc-1(xoe4) MATED	0 Rad	Non-IH Window	10	28	0	38
smc-5(ok2421);brc-1(xoe4) MATED	0 Rad	Non-IH Window	31	7	0	38
smc-5(ok2421);brc-1(xoe4) MATED	2500 Rad	IH Window	1	44	0	45
smc-5(ok2421);brc-1(xoe4) MATED	2500 Rad	IH Window	62	100	0	162
smc-5(ok2421);brc-1(xoe4) MATED	2500 Rad	IH Window	52	109	14	161
smc-5(ok2421);brc-1(xoe4) MATED	2500 Rad	IH Window	0	1	0	1
smc-5(ok2421);brc-1(xoe4) MATED	2500 Rad	Non-IH Window	0	13	0	13
smc-5(ok2421);brc-1(xoe4) MATED	2500 Rad	Non-IH Window	21	11	0	32
smc-5(ok2421);brc-1(xoe4) MATED	2500 Rad	Non-IH Window	40	16	0	56
smc-5(ok2421);brc-1(xoe4) MATED	2500 Rad	Non-IH Window	1	1	0	2
smc-5(ok2421);brc-1(xoe4) MATED	5000 Rad	IH Window	26	145	0	171
smc-5(ok2421);brc-1(xoe4) MATED	5000 Rad	IH Window	2	116	0	118
smc-5(ok2421);brc-1(xoe4) MATED	5000 Rad	IH Window	26	130	0	156
smc-5(ok2421);brc-1(xoe4) MATED	5000 Rad	IH Window	0	0	0	0
smc-5(ok2421);brc-1(xoe4) MATED	5000 Rad	IH Window	7	119	0	126
smc-5(ok2421);brc-1(xoe4) MATED	5000 Rad	Non-IH Window	4	61	0	65
smc-5(ok2421);brc-1(xoe4) MATED	5000 Rad	Non-IH Window	0	39	0	39
smc-5(ok2421);brc-1(xoe4) MATED	5000 Rad	Non-IH Window	3	51	0	54
smc-5(ok2421);brc-1(xoe4) MATED	5000 Rad	Non-IH Window	5	50	0	55
smc-5(ok2421);brc-1(xoe4) MATED	5000 Rad	Non-IH Window	5	39	0	44
smc-5(ok2421);brc-1(xoe4);lig-4(ok716)	0 Rad	IH Window	89	51	35	140
smc-5(ok2421);brc-1(xoe4);lig-4(ok716)	0 Rad	IH Window	186	23	0	209
smc-5(ok2421);brc-1(xoe4);lig-4(ok716)	0 Rad	IH Window	149	22	60	171
smc-5(ok2421);brc-1(xoe4);lig-4(ok716)	0 Rad	IH Window	118	10	1	128
smc-5(ok2421);brc-1(xoe4);lig-4(ok716)	0 Rad	IH Window	143	15	67	158
smc-5(ok2421);brc-1(xoe4);lig-4(ok716)	0 Rad	IH Window	106	30	20	136
smc-5(ok2421);brc-1(xoe4);lig-4(ok716)	0 Rad	IH Window	114	1	8	115
smc-5(ok2421);brc-1(xoe4);lig-4(ok716)	0 Rad	IH Window	81	4	28	85
smc-5(ok2421);brc-1(xoe4);lig-4(ok716)	0 Rad	IH Window	188	26	16	214
smc-5(ok2421);brc-1(xoe4);lig-4(ok716)	0 Rad	IH Window	137	9	43	146
smc-5(ok2421);brc-1(xoe4);lig-4(ok716)	0 Rad	IH Window	3	117	4	120
smc-5(ok2421);brc-1(xoe4);lig-4(ok716)	0 Rad	IH Window	42	80	8	122
smc-5(ok2421);brc-1(xoe4);lig-4(ok716)	0 Rad	IH Window	16	57	0	73
smc-5(ok2421);brc-1(xoe4);lig-4(ok716)	0 Rad	IH Window	178	42	0	220
smc-5(ok2421);brc-1(xoe4);lig-4(ok716)	0 Rad	IH Window	104	37	8	141
smc-5(ok2421);brc-1(xoe4);lig-4(ok716)	0 Rad	Non-IH Window	23	19	0	42
smc-5(ok2421);brc-1(xoe4);lig-4(ok716)	0 Rad	Non-IH Window	66	3	0	69
smc-5(ok2421);brc-1(xoe4);lig-4(ok716)	0 Rad	Non-IH Window	65	3	0	68
smc-5(ok2421);brc-1(xoe4);lig-4(ok716)	0 Rad	Non-IH Window	51	6	0	57
smc-5(ok2421);brc-1(xoe4);lig-4(ok716)	0 Rad	Non-IH Window	70	3	0	73
smc-5(ok2421);brc-1(xoe4);lig-4(ok716)	0 Rad	Non-IH Window	62	20	0	82
smc-5(ok2421);brc-1(xoe4);lig-4(ok716)	0 Rad	Non-IH Window	66	5	0	71
smc-5(ok2421);brc-1(xoe4);lig-4(ok716)	0 Rad	Non-IH Window	70	3	0	73
smc-5(ok2421);brc-1(xoe4);lig-4(ok716)	0 Rad	Non-IH Window	66	3	0	69
smc-5(ok2421);brc-1(xoe4);lig-4(ok716)	0 Rad	Non-IH Window	61	8	0	69
smc-5(ok2421);brc-1(xoe4);lig-4(ok716)	0 Rad	Non-IH Window	1	39	0	40
smc-5(ok2421);brc-1(xoe4);lig-4(ok716)	0 Rad	Non-IH Window	27	9	0	36
smc-5(ok2421);brc-1(xoe4);lig-4(ok716)	0 Rad	Non-IH Window	6	22	0	28
smc-5(ok2421);brc-1(xoe4);lig-4(ok716)	0 Rad	Non-IH Window	59	8	0	67
smc-5(ok2421);brc-1(xoe4);lig-4(ok716)	0 Rad	Non-IH Window	61	11	0	72
smc-5(ok2421);brc-1(xoe4);lig-4(ok716)	2500 Rad	IH Window	37	131	0	168
smc-5(ok2421);brc-1(xoe4);lig-4(ok716)	2500 Rad	IH Window	57	81	0	138
smc-5(ok2421);brc-1(xoe4);lig-4(ok716)	2500 Rad	IH Window	75	101	18	176
smc-5(ok2421);brc-1(xoe4);lig-4(ok716)	2500 Rad	IH Window	2	6	1	8
smc-5(ok2421);brc-1(xoe4);lig-4(ok716)	2500 Rad	IH Window	81	104	19	185
smc-5(ok2421);brc-1(xoe4);lig-4(ok716)	2500 Rad	IH Window	66	127	1	193
smc-5(ok2421);brc-1(xoe4);lig-4(ok716)	2500 Rad	IH Window	55	92	28	147
smc-5(ok2421);brc-1(xoe4);lig-4(ok716)	2500 Rad	IH Window	62	110	44	172
smc-5(ok2421);brc-1(xoe4);lig-4(ok716)	2500 Rad	IH Window	50	84	21	134
smc-5(ok2421);brc-1(xoe4);lig-4(ok716)	2500 Rad	IH Window	34	49	9	83
smc-5(ok2421);brc-1(xoe4);lig-4(ok716)	2500 Rad	IH Window	22	51	6	73
smc-5(ok2421);brc-1(xoe4);lig-4(ok716)	2500 Rad	IH Window	46	110	0	156
smc-5(ok2421);brc-1(xoe4);lig-4(ok716)	2500 Rad	IH Window	52	80	14	132
smc-5(ok2421);brc-1(xoe4);lig-4(ok716)	2500 Rad	IH Window	37	90	8	127
smc-5(ok2421);brc-1(xoe4);lig-4(ok716)	2500 Rad	IH Window	1	1	0	2
smc-5(ok2421);brc-1(xoe4);lig-4(ok716)	2500 Rad	Non-IH Window	33	21	0	54
smc-5(ok2421);brc-1(xoe4);lig-4(ok716)	2500 Rad	Non-IH Window	20	17	0	37
smc-5(ok2421);brc-1(xoe4);lig-4(ok716)	2500 Rad	Non-IH Window	36	24	0	60
smc-5(ok2421);brc-1(xoe4);lig-4(ok716)	2500 Rad	Non-IH Window	0	0	0	0
smc-5(ok2421);brc-1(xoe4);lig-4(ok716)	2500 Rad	Non-IH Window	42	32	0	74
smc-5(ok2421);brc-1(xoe4);lig-4(ok716)	2500 Rad	Non-IH Window	58	17	0	75
smc-5(ok2421);brc-1(xoe4);lig-4(ok716)	2500 Rad	Non-IH Window	49	17	0	66
smc-5(ok2421);brc-1(xoe4);lig-4(ok716)	2500 Rad	Non-IH Window	30	23	0	53
smc-5(ok2421);brc-1(xoe4);lig-4(ok716)	2500 Rad	Non-IH Window	41	12	0	53
smc-5(ok2421);brc-1(xoe4);lig-4(ok716)	2500 Rad	Non-IH Window	43	16	0	59
smc-5(ok2421);brc-1(xoe4);lig-4(ok716)	2500 Rad	Non-IH Window	13	42	0	55
smc-5(ok2421);brc-1(xoe4);lig-4(ok716)	2500 Rad	Non-IH Window	39	22	0	61
smc-5(ok2421);brc-1(xoe4);lig-4(ok716)	2500 Rad	Non-IH Window	40	14	0	54
smc-5(ok2421);brc-1(xoe4);lig-4(ok716)	2500 Rad	Non-IH Window	13	24	0	37
smc-5(ok2421);brc-1(xoe4);lig-4(ok716)	2500 Rad	Non-IH Window	1	0	0	1
smc-5(ok2421);brc-1(xoe4);lig-4(ok716)	5000 Rad	IH Window	14	141	0	155
smc-5(ok2421);brc-1(xoe4);lig-4(ok716)	5000 Rad	IH Window	0	0	0	0
smc-5(ok2421);brc-1(xoe4);lig-4(ok716)	5000 Rad	IH Window	22	123	6	145
smc-5(ok2421);brc-1(xoe4);lig-4(ok716)	5000 Rad	IH Window	18	141	20	159
smc-5(ok2421);brc-1(xoe4);lig-4(ok716)	5000 Rad	IH Window	20	102	0	122
smc-5(ok2421);brc-1(xoe4);lig-4(ok716)	5000 Rad	IH Window	14	75	18	89
smc-5(ok2421);brc-1(xoe4);lig-4(ok716)	5000 Rad	IH Window	6	88	9	94
smc-5(ok2421);brc-1(xoe4);lig-4(ok716)	5000 Rad	IH Window	4	40	23	44
smc-5(ok2421);brc-1(xoe4);lig-4(ok716)	5000 Rad	IH Window	0	0	0	0
smc-5(ok2421);brc-1(xoe4);lig-4(ok716)	5000 Rad	IH Window	28	129	8	157
smc-5(ok2421);brc-1(xoe4);lig-4(ok716)	5000 Rad	IH Window	7	72	29	79
smc-5(ok2421);brc-1(xoe4);lig-4(ok716)	5000 Rad	IH Window	8	79	30	87
smc-5(ok2421);brc-1(xoe4);lig-4(ok716)	5000 Rad	IH Window	8	87	0	95
smc-5(ok2421);brc-1(xoe4);lig-4(ok716)	5000 Rad	IH Window	0	16	0	16
smc-5(ok2421);brc-1(xoe4);lig-4(ok716)	5000 Rad	IH Window	20	94	3	114
smc-5(ok2421);brc-1(xoe4);lig-4(ok716)	5000 Rad	Non-IH Window	14	35	0	49
smc-5(ok2421);brc-1(xoe4);lig-4(ok716)	5000 Rad	Non-IH Window	5	41	0	46
smc-5(ok2421);brc-1(xoe4);lig-4(ok716)	5000 Rad	Non-IH Window	4	62	0	66
smc-5(ok2421);brc-1(xoe4);lig-4(ok716)	5000 Rad	Non-IH Window	6	50	0	56
smc-5(ok2421);brc-1(xoe4);lig-4(ok716)	5000 Rad	Non-IH Window	6	60	0	66
smc-5(ok2421);brc-1(xoe4);lig-4(ok716)	5000 Rad	Non-IH Window	3	31	0	34
smc-5(ok2421);brc-1(xoe4);lig-4(ok716)	5000 Rad	Non-IH Window	3	26	0	29
smc-5(ok2421);brc-1(xoe4);lig-4(ok716)	5000 Rad	Non-IH Window	0	47	0	47
smc-5(ok2421);brc-1(xoe4);lig-4(ok716)	5000 Rad	Non-IH Window	0	0	0	0
smc-5(ok2421);brc-1(xoe4);lig-4(ok716)	5000 Rad	Non-IH Window	4	59	0	63
smc-5(ok2421);brc-1(xoe4);lig-4(ok716)	5000 Rad	Non-IH Window	1	51	0	52
smc-5(ok2421);brc-1(xoe4);lig-4(ok716)	5000 Rad	Non-IH Window	7	87	0	94
smc-5(ok2421);brc-1(xoe4);lig-4(ok716)	5000 Rad	Non-IH Window	2	13	0	15
smc-5(ok2421);brc-1(xoe4);lig-4(ok716)	5000 Rad	Non-IH Window	2	14	0	16
smc-5(ok2421);brc-1(xoe4);lig-4(ok716)	5000 Rad	Non-IH Window	11	57	0	68
smc-5(ok2421);brc-1(xoe4);polq-1(tm2572)	0 Rad	IH Window	6	62	8	68
smc-5(ok2421);brc-1(xoe4);polq-1(tm2572)	0 Rad	IH Window	0	16	3	16
smc-5(ok2421);brc-1(xoe4);polq-1(tm2572)	0 Rad	IH Window	75	47	1	122
smc-5(ok2421);brc-1(xoe4);polq-1(tm2572)	0 Rad	IH Window	0	1	1	1
smc-5(ok2421);brc-1(xoe4);polq-1(tm2572)	0 Rad	IH Window	93	5	52	98
smc-5(ok2421);brc-1(xoe4);polq-1(tm2572)	0 Rad	IH Window	0	0	0	0
smc-5(ok2421);brc-1(xoe4);polq-1(tm2572)	0 Rad	IH Window	0	2	25	2
smc-5(ok2421);brc-1(xoe4);polq-1(tm2572)	0 Rad	IH Window	41	83	18	124
smc-5(ok2421);brc-1(xoe4);polq-1(tm2572)	0 Rad	IH Window	0	0	0	0
smc-5(ok2421);brc-1(xoe4);polq-1(tm2572)	0 Rad	IH Window	94	30	70	124
smc-5(ok2421);brc-1(xoe4);polq-1(tm2572)	0 Rad	IH Window	0	0	12	0
smc-5(ok2421);brc-1(xoe4);polq-1(tm2572)	0 Rad	IH Window	0	0	5	0
smc-5(ok2421);brc-1(xoe4);polq-1(tm2572)	0 Rad	IH Window	88	15	66	103
smc-5(ok2421);brc-1(xoe4);polq-1(tm2572)	0 Rad	IH Window	4	21	7	25
smc-5(ok2421);brc-1(xoe4);polq-1(tm2572)	0 Rad	Non-IH Window	13	16	0	29
smc-5(ok2421);brc-1(xoe4);polq-1(tm2572)	0 Rad	Non-IH Window	9	5	0	14
smc-5(ok2421);brc-1(xoe4);polq-1(tm2572)	0 Rad	Non-IH Window	44	0	0	44
smc-5(ok2421);brc-1(xoe4);polq-1(tm2572)	0 Rad	Non-IH Window	0	8	4	8
smc-5(ok2421);brc-1(xoe4);polq-1(tm2572)	0 Rad	Non-IH Window	62	0	0	62
smc-5(ok2421);brc-1(xoe4);polq-1(tm2572)	0 Rad	Non-IH Window	0	1	1	1
smc-5(ok2421);brc-1(xoe4);polq-1(tm2572)	0 Rad	Non-IH Window	0	10	4	10
smc-5(ok2421);brc-1(xoe4);polq-1(tm2572)	0 Rad	Non-IH Window	28	27	0	55
smc-5(ok2421);brc-1(xoe4);polq-1(tm2572)	0 Rad	Non-IH Window	0	0	0	0
smc-5(ok2421);brc-1(xoe4);polq-1(tm2572)	0 Rad	Non-IH Window	50	3	0	53
smc-5(ok2421);brc-1(xoe4);polq-1(tm2572)	0 Rad	Non-IH Window	0	0	0	0
smc-5(ok2421);brc-1(xoe4);polq-1(tm2572)	0 Rad	Non-IH Window	0	0	6	0
smc-5(ok2421);brc-1(xoe4);polq-1(tm2572)	0 Rad	Non-IH Window	48	6	0	54
smc-5(ok2421);brc-1(xoe4);polq-1(tm2572)	0 Rad	Non-IH Window	7	24	0	31
smc-5(ok2421);brc-1(xoe4);polq-1(tm2572)	2500 Rad	IH Window	7	44	0	51
smc-5(ok2421);brc-1(xoe4);polq-1(tm2572)	2500 Rad	IH Window	1	49	0	50
smc-5(ok2421);brc-1(xoe4);polq-1(tm2572)	2500 Rad	IH Window	0	40	8	40
smc-5(ok2421);brc-1(xoe4);polq-1(tm2572)	2500 Rad	IH Window	1	67	39	68
smc-5(ok2421);brc-1(xoe4);polq-1(tm2572)	2500 Rad	IH Window	0	27	0	27
smc-5(ok2421);brc-1(xoe4);polq-1(tm2572)	2500 Rad	IH Window	2	65	5	67
smc-5(ok2421);brc-1(xoe4);polq-1(tm2572)	2500 Rad	IH Window	0	17	7	17
smc-5(ok2421);brc-1(xoe4);polq-1(tm2572)	2500 Rad	IH Window	11	44	4	55
smc-5(ok2421);brc-1(xoe4);polq-1(tm2572)	2500 Rad	IH Window	17	35	19	52
smc-5(ok2421);brc-1(xoe4);polq-1(tm2572)	2500 Rad	IH Window	0	1	0	1
smc-5(ok2421);brc-1(xoe4);polq-1(tm2572)	2500 Rad	IH Window	42	39	0	81
smc-5(ok2421);brc-1(xoe4);polq-1(tm2572)	2500 Rad	IH Window	5	45	46	50
smc-5(ok2421);brc-1(xoe4);polq-1(tm2572)	2500 Rad	IH Window	0	30	0	30
smc-5(ok2421);brc-1(xoe4);polq-1(tm2572)	2500 Rad	IH Window	0	20	2	20
smc-5(ok2421);brc-1(xoe4);polq-1(tm2572)	2500 Rad	IH Window	15	86	2	101
smc-5(ok2421);brc-1(xoe4);polq-1(tm2572)	2500 Rad	Non-IH Window	1	32	0	33
smc-5(ok2421);brc-1(xoe4);polq-1(tm2572)	2500 Rad	Non-IH Window	0	14	0	14
smc-5(ok2421);brc-1(xoe4);polq-1(tm2572)	2500 Rad	Non-IH Window	0	31	0	31
smc-5(ok2421);brc-1(xoe4);polq-1(tm2572)	2500 Rad	Non-IH Window	2	44	0	46
smc-5(ok2421);brc-1(xoe4);polq-1(tm2572)	2500 Rad	Non-IH Window	2	30	0	32
smc-5(ok2421);brc-1(xoe4);polq-1(tm2572)	2500 Rad	Non-IH Window	0	44	0	44
smc-5(ok2421);brc-1(xoe4);polq-1(tm2572)	2500 Rad	Non-IH Window	0	18	0	18
smc-5(ok2421);brc-1(xoe4);polq-1(tm2572)	2500 Rad	Non-IH Window	3	49	1	52
smc-5(ok2421);brc-1(xoe4);polq-1(tm2572)	2500 Rad	Non-IH Window	14	33	0	47
smc-5(ok2421);brc-1(xoe4);polq-1(tm2572)	2500 Rad	Non-IH Window	0	17	0	17
smc-5(ok2421);brc-1(xoe4);polq-1(tm2572)	2500 Rad	Non-IH Window	0	7	0	7
smc-5(ok2421);brc-1(xoe4);polq-1(tm2572)	2500 Rad	Non-IH Window	2	54	0	56
smc-5(ok2421);brc-1(xoe4);polq-1(tm2572)	2500 Rad	Non-IH Window	0	36	0	36
smc-5(ok2421);brc-1(xoe4);polq-1(tm2572)	2500 Rad	Non-IH Window	0	16	0	16
smc-5(ok2421);brc-1(xoe4);polq-1(tm2572)	2500 Rad	Non-IH Window	3	34	0	37
smc-5(ok2421);brc-1(xoe4);polq-1(tm2572)	5000 Rad	IH Window	0	30	3	30
smc-5(ok2421);brc-1(xoe4);polq-1(tm2572)	5000 Rad	IH Window	0	16	1	16
smc-5(ok2421);brc-1(xoe4);polq-1(tm2572)	5000 Rad	IH Window	0	8	1	8
smc-5(ok2421);brc-1(xoe4);polq-1(tm2572)	5000 Rad	IH Window	0	22	5	22
smc-5(ok2421);brc-1(xoe4);polq-1(tm2572)	5000 Rad	IH Window	0	29	0	29
smc-5(ok2421);brc-1(xoe4);polq-1(tm2572)	5000 Rad	IH Window	0	19	17	19
smc-5(ok2421);brc-1(xoe4);polq-1(tm2572)	5000 Rad	IH Window	0	14	2	14
smc-5(ok2421);brc-1(xoe4);polq-1(tm2572)	5000 Rad	IH Window	1	24	0	25
smc-5(ok2421);brc-1(xoe4);polq-1(tm2572)	5000 Rad	IH Window	5	94	13	99
smc-5(ok2421);brc-1(xoe4);polq-1(tm2572)	5000 Rad	IH Window	19	121	16	140
smc-5(ok2421);brc-1(xoe4);polq-1(tm2572)	5000 Rad	IH Window	3	116	1	119
smc-5(ok2421);brc-1(xoe4);polq-1(tm2572)	5000 Rad	IH Window	0	8	0	8
smc-5(ok2421);brc-1(xoe4);polq-1(tm2572)	5000 Rad	IH Window	0	83	12	83
smc-5(ok2421);brc-1(xoe4);polq-1(tm2572)	5000 Rad	IH Window	2	56	0	58
smc-5(ok2421);brc-1(xoe4);polq-1(tm2572)	5000 Rad	IH Window	0	0	0	0
smc-5(ok2421);brc-1(xoe4);polq-1(tm2572)	5000 Rad	Non-IH Window	0	2	0	2
smc-5(ok2421);brc-1(xoe4);polq-1(tm2572)	5000 Rad	Non-IH Window	0	6	1	6
smc-5(ok2421);brc-1(xoe4);polq-1(tm2572)	5000 Rad	Non-IH Window	0	2	0	2
smc-5(ok2421);brc-1(xoe4);polq-1(tm2572)	5000 Rad	Non-IH Window	0	18	1	18
smc-5(ok2421);brc-1(xoe4);polq-1(tm2572)	5000 Rad	Non-IH Window	0	12	0	12
smc-5(ok2421);brc-1(xoe4);polq-1(tm2572)	5000 Rad	Non-IH Window	0	36	4	36
smc-5(ok2421);brc-1(xoe4);polq-1(tm2572)	5000 Rad	Non-IH Window	0	15	0	15
smc-5(ok2421);brc-1(xoe4);polq-1(tm2572)	5000 Rad	Non-IH Window	0	20	0	20
smc-5(ok2421);brc-1(xoe4);polq-1(tm2572)	5000 Rad	Non-IH Window	0	46	0	46
smc-5(ok2421);brc-1(xoe4);polq-1(tm2572)	5000 Rad	Non-IH Window	0	57	0	57
smc-5(ok2421);brc-1(xoe4);polq-1(tm2572)	5000 Rad	Non-IH Window	2	25	0	27
smc-5(ok2421);brc-1(xoe4);polq-1(tm2572)	5000 Rad	Non-IH Window	0	36	1	36
smc-5(ok2421);brc-1(xoe4);polq-1(tm2572)	5000 Rad	Non-IH Window	0	25	1	25
smc-5(ok2421);brc-1(xoe4);polq-1(tm2572)	5000 Rad	Non-IH Window	0	0	0	0
smc-5(ok2421);brc-1(xoe4);polq-1(tm2572) MATED	0 Rad	IH Window	0	3	0	3
smc-5(ok2421);brc-1(xoe4);polq-1(tm2572) MATED	0 Rad	IH Window	3	54	1	57
smc-5(ok2421);brc-1(xoe4);polq-1(tm2572) MATED	0 Rad	IH Window	55	24	1	79
smc-5(ok2421);brc-1(xoe4);polq-1(tm2572) MATED	0 Rad	IH Window	0	0	0	0
smc-5(ok2421);brc-1(xoe4);polq-1(tm2572) MATED	0 Rad	IH Window	0	68	1	68
smc-5(ok2421);brc-1(xoe4);polq-1(tm2572) MATED	0 Rad	IH Window	13	143	0	156
smc-5(ok2421);brc-1(xoe4);polq-1(tm2572) MATED	0 Rad	IH Window	8	83	0	91
smc-5(ok2421);brc-1(xoe4);polq-1(tm2572) MATED	0 Rad	IH Window	47	123	4	170
smc-5(ok2421);brc-1(xoe4);polq-1(tm2572) MATED	0 Rad	IH Window	1	44	3	45
smc-5(ok2421);brc-1(xoe4);polq-1(tm2572) MATED	0 Rad	Non-IH Window	4	0	0	4
smc-5(ok2421);brc-1(xoe4);polq-1(tm2572) MATED	0 Rad	Non-IH Window	0	0	0	0
smc-5(ok2421);brc-1(xoe4);polq-1(tm2572) MATED	0 Rad	Non-IH Window	2	11	0	13
smc-5(ok2421);brc-1(xoe4);polq-1(tm2572) MATED	0 Rad	Non-IH Window	33	2	0	35
smc-5(ok2421);brc-1(xoe4);polq-1(tm2572) MATED	0 Rad	Non-IH Window	0	0	0	0
smc-5(ok2421);brc-1(xoe4);polq-1(tm2572) MATED	0 Rad	Non-IH Window	0	19	0	19
smc-5(ok2421);brc-1(xoe4);polq-1(tm2572) MATED	0 Rad	Non-IH Window	0	30	2	30
smc-5(ok2421);brc-1(xoe4);polq-1(tm2572) MATED	0 Rad	Non-IH Window	10	19	0	29
smc-5(ok2421);brc-1(xoe4);polq-1(tm2572) MATED	0 Rad	Non-IH Window	38	24	0	62
smc-5(ok2421);brc-1(xoe4);polq-1(tm2572) MATED	0 Rad	Non-IH Window	0	2	2	2
smc-5(ok2421);brc-1(xoe4);polq-1(tm2572) MATED	2500 Rad	IH Window	0	17	0	17
smc-5(ok2421);brc-1(xoe4);polq-1(tm2572) MATED	2500 Rad	IH Window	0	44	1	44
smc-5(ok2421);brc-1(xoe4);polq-1(tm2572) MATED	2500 Rad	IH Window	41	117	1	158
smc-5(ok2421);brc-1(xoe4);polq-1(tm2572) MATED	2500 Rad	IH Window	4	7	0	11
smc-5(ok2421);brc-1(xoe4);polq-1(tm2572) MATED	2500 Rad	IH Window	0	43	0	43
smc-5(ok2421);brc-1(xoe4);polq-1(tm2572) MATED	2500 Rad	IH Window	0	51	0	51
smc-5(ok2421);brc-1(xoe4);polq-1(tm2572) MATED	2500 Rad	IH Window	0	41	0	41
smc-5(ok2421);brc-1(xoe4);polq-1(tm2572) MATED	2500 Rad	IH Window	44	36	0	80
smc-5(ok2421);brc-1(xoe4);polq-1(tm2572) MATED	2500 Rad	Non-IH Window	0	3	0	3
smc-5(ok2421);brc-1(xoe4);polq-1(tm2572) MATED	2500 Rad	Non-IH Window	0	15	0	15
smc-5(ok2421);brc-1(xoe4);polq-1(tm2572) MATED	2500 Rad	Non-IH Window	5	30	0	35
smc-5(ok2421);brc-1(xoe4);polq-1(tm2572) MATED	2500 Rad	Non-IH Window	0	2	0	2
smc-5(ok2421);brc-1(xoe4);polq-1(tm2572) MATED	2500 Rad	Non-IH Window	0	25	1	25
smc-5(ok2421);brc-1(xoe4);polq-1(tm2572) MATED	2500 Rad	Non-IH Window	0	18	0	18
smc-5(ok2421);brc-1(xoe4);polq-1(tm2572) MATED	2500 Rad	Non-IH Window	0	11	0	11
smc-5(ok2421);brc-1(xoe4);polq-1(tm2572) MATED	2500 Rad	Non-IH Window	2	4	0	6
smc-5(ok2421);brc-1(xoe4);polq-1(tm2572) MATED	5000 Rad	IH Window	8	75	0	83
smc-5(ok2421);brc-1(xoe4);polq-1(tm2572) MATED	5000 Rad	IH Window	0	66	0	66
smc-5(ok2421);brc-1(xoe4);polq-1(tm2572) MATED	5000 Rad	IH Window	2	59	0	61
smc-5(ok2421);brc-1(xoe4);polq-1(tm2572) MATED	5000 Rad	IH Window	13	115	1	128
smc-5(ok2421);brc-1(xoe4);polq-1(tm2572) MATED	5000 Rad	IH Window	2	81	0	83
smc-5(ok2421);brc-1(xoe4);polq-1(tm2572) MATED	5000 Rad	IH Window	0	0	0	0
smc-5(ok2421);brc-1(xoe4);polq-1(tm2572) MATED	5000 Rad	IH Window	0	55	0	55
smc-5(ok2421);brc-1(xoe4);polq-1(tm2572) MATED	5000 Rad	IH Window	0	44	0	44
smc-5(ok2421);brc-1(xoe4);polq-1(tm2572) MATED	5000 Rad	IH Window	0	96	0	96
smc-5(ok2421);brc-1(xoe4);polq-1(tm2572) MATED	5000 Rad	IH Window	0	9	0	9
smc-5(ok2421);brc-1(xoe4);polq-1(tm2572) MATED	5000 Rad	Non-IH Window	4	26	0	30
smc-5(ok2421);brc-1(xoe4);polq-1(tm2572) MATED	5000 Rad	Non-IH Window	0	25	0	25
smc-5(ok2421);brc-1(xoe4);polq-1(tm2572) MATED	5000 Rad	Non-IH Window	0	18	0	18
smc-5(ok2421);brc-1(xoe4);polq-1(tm2572) MATED	5000 Rad	Non-IH Window	3	58	0	61
smc-5(ok2421);brc-1(xoe4);polq-1(tm2572) MATED	5000 Rad	Non-IH Window	1	21	0	22
smc-5(ok2421);brc-1(xoe4);polq-1(tm2572) MATED	5000 Rad	Non-IH Window	0	4	0	4
smc-5(ok2421);brc-1(xoe4);polq-1(tm2572) MATED	5000 Rad	Non-IH Window	0	22	0	22
smc-5(ok2421);brc-1(xoe4);polq-1(tm2572) MATED	5000 Rad	Non-IH Window	0	14	0	14
smc-5(ok2421);brc-1(xoe4);polq-1(tm2572) MATED	5000 Rad	Non-IH Window	0	29	0	29
smc-5(ok2421);brc-1(xoe4);polq-1(tm2572) MATED	5000 Rad	Non-IH Window	1	7	0	8
